# Supplementary material for: Reporting quality for abstracts of randomised trials on child and adolescent depression prevention: a meta-epidemiological study on adherence to CONSORT for abstracts
Source: PubMed Central journal article supplement — BMJ Open. 2022 Aug 3;12(8):e061873. doi: 10.1136/bmjopen-2022-061873 (PMC9352996; doi:10.1136/bmjopen-2022-061873), 2022-08-03
Supplement: bmjopen-2022-061873.draft_revisions.pdf [file bmjopen-2022-061873.draft_revisions.pdf]

# BMJ Open

BMJ Open is committed to open peer review. As part of this commitment we make the peer review history of every article we publish publicly available.

When an article is published we post the peer reviewers' comments and the authors' responses online. We also post the versions of the paper that were used during peer review. These are the versions that the peer review comments apply to.

The versions of the paper that follow are the versions that were submitted during the peer review process. They are not the versions of record or the final published versions. They should not be cited or distributed as the published version of this manuscript.

BMJ Open is an open access journal and the full, final, typeset and author-corrected version of record of the manuscript is available on our site with no access controls, subscription charges or pay-per-view fees (<http://bmjopen.bmj.com>).

If you have any questions on BMJ Open's open peer review process please email [info.bmjopen@bmj.com](mailto:info.bmjopen@bmj.com)

# BMJ Open

## Reporting quality for abstracts of randomised trials on child and adolescent depression prevention: A meta-epidemiological study on adherence to CONSORT for abstracts

|                               |                                                                                                                                                                                                                                                                                                         |
|-------------------------------|---------------------------------------------------------------------------------------------------------------------------------------------------------------------------------------------------------------------------------------------------------------------------------------------------------|
| Journal:                      | <i>BMJ Open</i>                                                                                                                                                                                                                                                                                         |
| Manuscript ID                 | bmjopen-2022-061873                                                                                                                                                                                                                                                                                     |
| Article Type:                 | Original research                                                                                                                                                                                                                                                                                       |
| Date Submitted by the Author: | 28-Feb-2022                                                                                                                                                                                                                                                                                             |
| Complete List of Authors:     | Wiehn, Jascha; Charité Universitätsmedizin Berlin, Institute of Public Health<br>Nonte, Johanna; Universität Bielefeld, Department of Population Medicine and Health Services Research, Bielefeld School of Public Health<br>Prugger, C; Charite Universitatsmedizin Berlin, Institute of Public Health |
| Keywords:                     | STATISTICS & RESEARCH METHODS, MENTAL HEALTH, PAEDIATRICS, Child & adolescent psychiatry < PSYCHIATRY, Depression & mood disorders < PSYCHIATRY                                                                                                                                                         |
|                               |                                                                                                                                                                                                                                                                                                         |

SCHOLARONE™  
Manuscripts

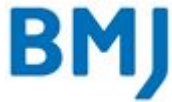

I, the Submitting Author has the right to grant and does grant on behalf of all authors of the Work (as defined in the below author licence), an exclusive licence and/or a non-exclusive licence for contributions from authors who are: i) UK Crown employees; ii) where BMJ has agreed a CC-BY licence shall apply, and/or iii) in accordance with the terms applicable for US Federal Government officers or employees acting as part of their official duties; on a worldwide, perpetual, irrevocable, royalty-free basis to BMJ Publishing Group Ltd ("BMJ") its licensees and where the relevant Journal is co-owned by BMJ to the co-owners of the Journal, to publish the Work in this journal and any other BMJ products and to exploit all rights, as set out in our [licence](#).

The Submitting Author accepts and understands that any supply made under these terms is made by BMJ to the Submitting Author unless you are acting as an employee on behalf of your employer or a postgraduate student of an affiliated institution which is paying any applicable article publishing charge ("APC") for Open Access articles. Where the Submitting Author wishes to make the Work available on an Open Access basis (and intends to pay the relevant APC), the terms of reuse of such Open Access shall be governed by a Creative Commons licence – details of these licences and which [Creative Commons](#) licence will apply to this Work are set out in our licence referred to above.

Other than as permitted in any relevant BMJ Author's Self Archiving Policies, I confirm this Work has not been accepted for publication elsewhere, is not being considered for publication elsewhere and does not duplicate material already published. I confirm all authors consent to publication of this Work and authorise the granting of this licence.

1  
2  
3 1 Title of the article: Reporting quality for abstracts of randomised trials on child and adolescent  
4  
5 2 depression prevention: A meta-epidemiological study on adherence to CONSORT for abstracts  
6  
7

8 3 Corresponding author: Jascha Wiehn; [jascha.wiehn@charite.de](mailto:jascha.wiehn@charite.de), Charitéplatz 1, 10117 Berlin  
9

10  
11 4 First author: Jascha Wiehn, Institute of Public Health, Charité – Universitätsmedizin Berlin, Berlin,  
12  
13 5 Germany  
14

15  
16 6 Second author: Johanna Nonte, Department of Population Medicine and Health Services  
17  
18 7 Research, Bielefeld School of Public Health, Bielefeld University, Bielefeld, Germany  
19

20  
21 8 Third author: Christof Prugger, Institute of Public Health, Charité – Universitätsmedizin Berlin,  
22  
23 9 Berlin, Germany  
24

25 10 Word count: 3,850  
26  
27

28 11  
29  
30  
31  
32  
33  
34  
35  
36  
37  
38  
39  
40  
41  
42  
43  
44  
45  
46  
47  
48  
49  
50  
51  
52  
53  
54  
55  
56  
57  
58  
59  
60

## 12 **ABSTRACT**

### 13 **Objectives**

14 This meta-epidemiological study aimed to investigate adherence to CONSORT for abstracts in  
15 reports of randomised trials on child and adolescent depression prevention. Secondary objective  
16 was to examine factors associated with overall reporting quality.

### 18 **Participants**

19 Trials were eligible if the sample consisted of children and adolescents under 18 years with or  
20 without an increased risk for depression or subthreshold depression.

### 22 **Interventions**

23 We included reports on RCTs and CRTs assessing universal, selective, and indicated  
24 interventions aiming to prevent the onset of depression or reducing depressive symptoms.

### 26 **Primary and secondary outcome measures**

27 As the primary outcome measure, we assessed for each trial abstract whether information  
28 recommended by CONSORT was adequately reported, inadequately reported, or not reported.

29 Moreover, we calculated a summative score of overall reporting quality and analysed associations  
30 with trial and journal characteristics.

### 32 **Results**

1  
2  
3 33 We identified 169 eligible studies, 103 (61%) RCTs and 66 (39%) CRTs. Adequate reporting  
4  
5 34 varied considerably across CONSORT items: while 9 out of 10 abstracts adequately reported the  
6  
7 35 study objective, no abstract adequately provided information on blinding. Important adverse  
8  
9 36 events or side effects were only adequately reported in one out of 169 abstracts. Summative  
10  
11 37 scores for the abstracts' overall reporting quality ranged from 17% to 83%, with a median of 40%.  
12  
13 38 Scores were associated with the number of authors, abstract word count, journal impact factor,  
14  
15 39 year of publication and abstract structure.  
16  
17  
18  
19  
20

## 21 **Conclusions**

22  
23  
24 42 Reporting quality for abstracts of trials on child and adolescent depression prevention is  
25  
26 43 suboptimal. To help health professionals make informed judgments, efforts for improving  
27  
28 44 adherence to reporting guidelines for abstracts are needed.  
29  
30

## 31 **Strengths and limitations of this study**

- 32  
33  
34  
35  
36 47
- 37 • This study is the first to systematically assess the reporting quality for abstracts of  
38 randomized trials on paediatric depression prevention.
  - 39 • Our extensive, reproducible search strategy identified 169 eligible journal articles reflecting  
40 the available evidence from such trials published 2003 to 2020.
  - 41 • Two reviewers independently screened abstracts and extracted data using standardised  
42 methods, but the reviewers were not blinded to meta-data such as study authors, journal  
43 name or year of publication.
  - 44 • Since no method has so far been established for determining overall reporting quality of  
45 abstracts, we approximated overall reporting quality by calculating a summative score  
46 based on CONSORT items.
- 47  
48  
49  
50  
51  
52  
53  
54  
55  
56  
57  
58  
59  
60

1  
2  
3  
4  
5  
6  
7  
8  
9  
10  
11  
12  
13  
14  
15  
16  
17  
18  
19  
20  
21  
22  
23  
24  
25  
26  
27  
28  
29  
30  
31  
32  
33  
34  
35  
36  
37  
38  
39  
40  
41  
42  
43  
44  
45  
46  
47  
48  
49  
50  
51  
52  
53  
54  
55  
56  
57  
58  
59  
60

- 57 • Because we applied a topic-based approach without restricting the information source to  
58 specific journals, our study findings offer insights into general reporting quality in trials on  
59 childhood depression prevention.

For peer review only

## 1 INTRODUCTION

Reports of trials should provide all necessary information allowing readers to evaluate the reproducibility, validity and utility of studies and findings. [1, 2] Poor reporting of health research leads, at the very least, to avoidable waste of resources [3] and can ultimately jeopardize patient care. [4] The same applies to abstracts of trials. Due to time, access and language constraints, health professionals often use abstracts as the primary source of information to learn about a trial, [5, 6] and the way abstracts report study details can influence their decisions in patient management. [7] Researchers conducting systematic reviews and meta-analyses may incorrectly exclude eligible studies in title and abstract screening due to poor reporting which can distort evidence synthesis. [8] Moreover, indexers of literature databases rely on adequate title and abstract reporting to correctly determine search terms such as medical subject headings, otherwise relevant journal articles cannot be found, read and quoted to affect medical practice.

For these reasons, authors of randomized trial reports are encouraged to follow the Consolidated Standards of Reporting Trials (CONSORT) guidelines [5–8] and its extension for abstracts (CONSORT-A). [9, 10] CONSORT-A was published in 2008 to provide guidance to authors on information to be reported in abstracts of randomized controlled trials (RCTs). In 2012, the guidelines were further complemented by a module for cluster randomized trial (CRT) abstracts (CONSORT-C). [11] Although some improvement in reporting quality of trials has been observed over recent years, [12] general adherence to CONSORT guidelines remains suboptimal in articles published both in general medicine [13–17] and psychiatry/psychology journals. [18–20] Similar results have been reported from studies on adherence to CONSORT-A for abstract reporting in various health disciplines including one previous study on abstracts of psychiatric RCTs.[21] However, no prior study has investigated the abstract reporting quality of depression prevention trials in young people. We therefore aimed to evaluate to what extent CONSORT-A and CONSORT-C criteria are met by abstracts of reports on child and adolescent depression



1  
2  
3 85 prevention trials. Secondary objective of our study was to explore trial and journal characteristics  
4  
5 86 associated with the abstracts' overall reporting quality.  
6  
7

## 8 87 **2 METHODS**

### 9 88 **2.1 Eligibility criteria**

10  
11  
12  
13  
14 89 We included reports on RCTs and CRTs assessing universal, selective and indicated interventions  
15  
16 90 aiming to prevent the onset of depression or reducing depressive symptoms in children and  
17  
18 91 adolescents under 18 years with or without an increased risk for depression or subthreshold  
19  
20 92 depression. A detailed list of the eligibility criteria is provided in Supplementary S1. We only  
21  
22 93 included research articles published in peer-reviewed journals, the primary source of information  
23  
24 94 for paediatric health specialists,[22] and we considered the period between January 1, 2003 and  
25  
26 95 August 5, 2020 to assess reporting quality before and after the publication of CONSORT-A and -  
27  
28 96 C guidelines.  
29  
30

### 31 97 **2.2 Information sources**

32  
33  
34 98 We searched the electronic literature databases MEDLINE (via PubMed and Ovid®), EMBASE  
35  
36 99 (via Ovid®), PsychINFO (via EBSCOhost®), PsycArticles (via EBSCOhost®), and CENTRAL (via  
37  
38 100 Cochrane Library) on March 9, 2019 and updated the search on August 8, 2019. Search strings  
39  
40 101 were developed in collaboration with a trained librarian. The electronic search strategy for  
41  
42 102 MEDLINE via PubMed is shown in Supplementary S2. Electronic search strategies for the other  
43  
44 103 databases are provided in an online repository  
45  
46 104 ([https://osf.io/ahzwn/?view\\_only=e2f08c5c0d2d4936ba88d38968aba5d9](https://osf.io/ahzwn/?view_only=e2f08c5c0d2d4936ba88d38968aba5d9)). Additional articles  
47  
48 105 were retrieved by hand-searching four specialty journals and the reference lists of systematic  
49  
50 106 reviews (Supplementary S3).  
51  
52  
53  
54  
55  
56  
57  
58  
59  
60

## 2.3 Study selection

After merging records from literature databases and removing duplicates, records of 4,279 articles entered title and abstract screening, and 520 articles were subsequently evaluated in full text screening by three pairs of independent reviewers (Figure 1). In consensus, 162 articles were judged to be eligible and 276 articles were judged to be not eligible. The reviewers disagreed in 82 cases and reached a consensus through discussions to include 5 and exclude 67 articles. Ten discussions did not result in consensus, so a third reviewer decided to discard eight and include two articles. Interrater reliability as assessed by Cohen's kappa (unweighted) for the agreement between the three reviewer pairs (article eligible vs. non-eligible) was moderate in the title and abstract screening with  $\kappa = 0.39$ ,  $\kappa = 0.47$  and  $\kappa = 0.55$  and higher in the full-text screening with  $\kappa = 0.59$ ,  $\kappa = 0.73$  and  $\kappa = 0.67$ .

## 2.4 Data collection

Two independent reviewers extracted information from the 169 identified articles into piloted spreadsheets with drop-down menus. The reviewers first determined whether randomization was performed on an individual (RCT) or cluster level (CRT) and subsequently assessed all abstracts according to CONSORT-A and CRTs additionally according to CONSORT-C. [10, 11] For each item, the reviewers judged whether the abstract reported information adequately, inadequately or not at all. For interrater reliability on CONSORT items, please refer to Supplementary S4.

For items with multiple dimensions, we operationalized each dimension separately and then created item variables for analysis based on the extracted information. For example, CONSORT-A item 03 *Participants* requires reporting the eligibility criteria for participants and settings where the data were collected. Thus, if both dimensions were reported adequately (or not at all), then the item was judged as adequately reported (or as not reported). However, if either the eligibility criteria for participants or for settings was reported inadequately, the item was judged as

1  
2  
3 131 inadequately reported. Additional variables for which data were extracted are listed in  
4  
5 132 Supplementary S5.  
6  
7

## 8 133 **2.5 Statistical analysis**

9  
10 134 We used descriptive statistics to summarize the extent to which RCT and CRT abstracts adhered  
11  
12 135 to the 15 CONSORT-A items and CRT abstracts adhered to the additional eight CONSORT-C  
13  
14 136 items. For each CONSORT item we thus present the proportion of trial abstracts adequately,  
15  
16 137 inadequately, or not reporting the item information as required by the appropriate guideline.  
17

18  
19 138 We calculated summative scores of overall reporting quality grading CONSORT items as follows:  
20  
21 139 (i) adequately reported (2 points), (ii) inadequately reported (1 point), and (iii) not reported (0  
22  
23 140 points). Depending on the study design, these overall reporting quality scores (RQS) could thus  
24  
25 141 theoretically range from 0 to 30 for RCTs (15 CONSORT-A items) and from 0 to 46 for CRTs (eight  
26  
27 142 additional CONSORT-C items). We transformed RQS to standardized percentages with possible  
28  
29 143 ranges from 0 (lowest reporting quality) to 100 (highest reporting quality).  
30  
31

32  
33 144 We compared unstructured (1 section), structured (2-4 sections) and highly structured (>4  
34  
35 145 sections) abstracts [23] in relation to RQS using the Kruskal-Wallis test. We fitted separate linear  
36  
37 146 regression models to quantify associations between overall reporting quality and (i) number of  
38  
39 147 authors, (ii) sample size, (iii) number of sampling points, (iv) abstract word count, (v) journal impact  
40  
41 148 factor and (vi) year of publication. Because of heavily skewed distributions (Supplementary S6)  
42  
43 149 we log-transformed (log 10) the first five abovementioned variables for analysis. It should be noted  
44  
45 150 that this is descriptive modelling not aiming at prediction or causal inference. [24] We used RStudio  
46  
47 151 (R version 4.1.1) for data analysis.  
48  
49

## 50 152 **2.6 Patient and public involvement**

51  
52 153 Instead of patient data we used information of previously published trial reports. Thus, no patients  
53  
54 154 or public were involved in this study. Yet, our results can inform authors, editors, reviewers, and  
55  
56 155 readers of the scientific literature.  
57  
58

## 156 **3 RESULTS**

### 157 **3.1 Characteristics of included abstracts**

158 We identified 169 articles, of which 61% were reports on RCTs (n=103) and 39% reports on CRTs  
159 (n=66). More than half of these articles were published between 2015 and 2020 (Supplementary  
160 S7). Median number of authors was five (range: 1 – 24, Q1: 4, Q3: 8). Sample size ranged from  
161 23 to 12,391 participants, with a median of 271 (Q1: 120, Q3: 670). Twenty-one of the reported  
162 studies were performed at a single site, while 117 were reports of multicenter studies. Median  
163 abstract word count was 225 words, with range from 68 to 623 (Q1: 175, Q3: 253). The median  
164 journal impact factor was 3.2 (Q1: 2.1, Q3: 4.3). Fifty-seven percent of the included abstracts were  
165 unstructured (n=97), one-third of the abstracts were structured with two to four sections (n=56),  
166 and the remaining 10% were highly structured (n=16), i.e., with more than four sections.

### 167 **3.2 Adherence to CONSORT for abstracts**

168 Figure 2 summarizes the results on adherence to CONSORT for abstracts items, i.e. the  
169 proportion of trial abstracts reporting item information adequately, inadequately and not at all  
170 (please see also Supplementary S4 for exact figures). The percentage of adequate reporting  
171 among general items ranged from 58.0% (item *01 Title*) to 30.2% (item *02 Trial design*). With  
172 regards to trial methodology, the highest percentage of adequate reporting was in item *05*  
173 *Objective*. Nine out of ten trial abstracts adequately reported the specific study objective or  
174 hypothesis. On the contrary, not a single trial abstract adequately reported whether participants,  
175 care givers and those assessing the outcomes were blinded to group assignment (item *08*  
176 *Blinding*). Regarding trial results, item *13 Conclusions* had the highest percentage of adequate  
177 reporting (36.7%) and item *12 Harms* the lowest (0.6%).

### 178 **3.3 Overall reporting quality and associated factors**

179 The distribution of the RQS among all abstracts and stratified by study design is depicted in Figure  
180 3. In all abstracts, the median RQS was 40% (range 17 – 47) with 25<sup>th</sup> and 75<sup>th</sup> percentile of 33%

1  
2  
3 181 and 47%, respectively. The RQS was slightly higher in RCT abstracts than in CRT abstracts  
4  
5 182 (median 43% vs. 37%). The graphs in Figure 4 visualize the relationship of trial and journal  
6  
7 183 characteristics with RQS. Number of authors, abstract word count and journal impact factor were  
8  
9 184 positively associated with RQS. For example, for every 10% increase in the journal impact factor,  
10  
11 185 the RQS increased by about 1.9 percentage points (calculation: coefficient  $5.6 \times \log(1.10) \approx 1.9$ ).  
12  
13 186 Moreover, RQS increased with each year after publication of CONSORT-A in 2008. Structured (2-  
14  
15 187 4 sections) and in particular highly structured abstracts (>4 sections) had a higher RQS than  
16  
17 188 unstructured abstracts (1 section). Sample size and number of sampling points were not related  
18  
19 189 to RQS.  
20  
21  
22

## 23 190 **4 DISCUSSION**

24  
25  
26 191 In the present study, we assessed reporting quality for abstracts of child and adolescent  
27  
28 192 depression prevention trial reports. Overall, we found that adherence with CONSORT-A and  
29  
30 193 -C for abstracts is suboptimal in journal articles reporting on such studies between 2003 and  
31  
32 194 2020. Reporting quality plays a crucial role generating and translating scientific evidence as  
33  
34 195 it increases transparency and accuracy and thereby enables health professionals to identify,  
35  
36 196 evaluate, replicate and implement trial results. Thus, the scientific interest in assessing and  
37  
38 197 improving reporting quality of trials has steadily increased over time.[25]  
39  
40  
41

### 42 198 **4.1 Comparison with previous studies**

43  
44 199 Meta-epidemiological studies of reporting quality follow two distinct methodological approaches.  
45  
46 200 In the journal-based approach, one or more journals are selected, usually top journals in a specific  
47  
48 201 field with a high-impact factor, and the published articles are assessed. Examples comprise  
49  
50 202 studies on the abstract reporting quality in general [15, 16, 26–28] and internal medicine, [29–  
51  
52 203 31] anesthesiology, [32–34] surgery, [35, 36] nursing [37] and critical care.[38] The only prior  
53  
54 204 study on abstracts of psychiatric trials followed this approach as well. [21] However, the  
55  
56  
57  
58  
59

1  
2  
3 205 restriction to top journals could affect generalizability, as a higher impact factor may be associated  
4  
5 206 with better reporting quality. [21, 29, 37, 39–43] Thus, journal-based meta-epidemiological studies  
6  
7 207 might overestimate the quality of abstract reporting. On the contrary, in the topic-based approach,  
8  
9 208 no constraints are made regarding the journals. Instead, literature databases are systematically  
10  
11 209 searched for articles on a specific disease, therapy or other topic.[39, 40, 43–49] This increases  
12  
13 210 the variety of journals, making it difficult to draw conclusions about reporting quality of specific  
14  
15 211 journals. However, the topic-based approach increases generalizability by also including journals  
16  
17 212 with a lower impact factor and thus provide a more complete picture of reporting quality.  
18  
19

20  
21 213 Another methodological aspect that differs between studies is the selected time frame for eligible  
22  
23 214 studies. While some studies cover one [15, 16, 37, 46] or two years, [27, 32, 40, 47, 50, 51] others  
24  
25 215 look at several decades.[39] Moreover, studies differ regarding the temporal relation to the release  
26  
27 216 of CONSORT-A in 2008. For example, Chen et al. cover a period prior to the guideline release  
28  
29 217 (1998 to 2007),[26] the work by Menne et al. concerns a post-release period (2016 to 2021),[52]  
30  
31 218 and some but not all studies including the year 2008 compare periods up to and after the  
32  
33 219 publication of CONSORT-A.[21, 27, 29, 30, 33, 35, 37, 39, 41, 42, 44]  
34  
35

36 220 In setting our study within the available evidence, special mention deserves the study by Song et  
37  
38 221 al. that applied a journal-based approach investigating reporting quality in RCT abstracts  
39  
40 222 published in high-impact psychiatry journals both prior (2005-2007) and after (2012-2014) the  
41  
42 223 release of CONSORT-A. [21] In this systematic review of RCT abstracts in psychiatry,[21] about  
43  
44 224 one out of five included trials addressed depression, and few studies among children or  
45  
46 225 adolescents with clinical depression were evaluated. [53, 54] However, in contrast to our study,  
47  
48 226 with the exception of one single RCT, Song et al. left trials on non-pharmacological interventions  
49  
50 227 in childhood prevention unconsidered.  
51  
52  
53  
54  
55  
56  
57  
58  
59  
60

#### 228 4.1.1 General items

229 In our study, the general items *01 Title* and *02 Trial design* were adequately reported in about  
230 60% and 30% of trial abstracts, respectively. Similarly, Song et al. reported in their study that  
231 66% of trials stated "randomized" in the title but only 14% of trials described the study design  
232 in the abstract.[21] It is noticeable that studies which have chosen a time frame closer to the  
233 present tend to have higher reporting quality on these items. For example, Menne et al.  
234 including trial abstracts published in the period from 2016 to 2021 found all studies adequately  
235 reported the title and a quarter of trial abstracts had adequate information on trial design.[52]  
236 On the other hand, Cui et al. evaluating trial abstracts published between 1999 and 2012  
237 found only 5.5% and 3% of abstracts adequately reported the title and trial design,  
238 respectively.[39]

239 CONSORT-C requires that abstracts are denoted as cluster randomized in the title (item *01*  
240 *Title (cluster extension)*). In our study, however, only one third of all CRT abstracts adequately  
241 reported this item. To our knowledge, the present study is the first to examine adherence to  
242 CONSORT-C guidelines in CRT abstracts. Yet, some meta-epidemiological studies examined  
243 adherence to CONSORT-C for full texts, which includes the same item. For example, Chan  
244 et al. showed that about two thirds of pilot or feasibility CRT reports published between 2011  
245 and 2014 adequately met this CONSORT item. [55] Similarly, Ivers et al., Diaz-Ordaz et al.,  
246 and Walleser et al. found that 48%, 60%, and 98% of CRTs, respectively, state in the title or  
247 abstract that the study is a CRT. [56–58]

#### 248 4.1.2 Trial methodology

249 Among all 169 included abstracts, 36% adequately reported both eligibility criteria for participants  
250 and setting. In line with many previous studies,[16, 21, 29, 34, 38, 59] we extracted the originally  
251 combined information for CONSORT item *03 Participants* using separate dimensions: (i) eligibility

1  
2  
3 252 criteria for participants and (ii) eligibility criteria for settings. Some differences to Song et al. can  
4  
5 253 be observed for these sub-dimensions (participants: 81% in this study vs. 95% in Song et al.;  
6  
7 254 setting: 36% in this study vs. 32% in Song et al.). In contrast, other studies assessed reporting  
8  
9 255 of eligibility criteria for participants only.[27, 44, 50, 60] It is not surprising that these studies show  
10  
11 256 the highest proportions of adequate reporting for this item.

12  
13  
14 257 We found that 98% of abstracts failed to adequately include information on how participants were  
15  
16 258 assigned to interventions and that 96% of abstracts lacked complete information on whether  
17  
18 259 participants, program deliverer and data collectors/analysts were blinded. Generally, this issue of  
19  
20 260 inadequate abstract reporting of CONSORT items *07 Randomization* and *08 Blinding* can be  
21  
22 261 observed both in studies using journal- and topic-based approaches; with a few exceptions,[16,  
23  
24 262 37, 43–45, 49] most previous studies reported adherence to these items of well below 10%. [15,  
25  
26 263 21, 26, 27, 29–36, 38–42, 46, 47, 50, 51, 61–64]

### 264 4.1.3 Trial results

265 We found that the number of participants randomized to each group was adequately reported in  
266 approximately a third of all abstracts. The proportion of adequately reporting abstracts drops to  
267 four percent when it comes to the number of participants analyzed in each group. This gap  
268 between adequate reporting of numbers randomized versus numbers analyzed has also been  
269 observed in previous meta-epidemiological studies. As an example, Fleming et al. reported  
270 that 96% of abstracts published in leading orthodontic journals between 2006 and 2011  
271 provided adequate information on the number of participants randomized, but only one in four  
272 of the included abstracts adequately reported the number of participants analyzed.[61]

273 Only one article in our sample elaborated on adverse or unintended effects in the abstract,  
274 whereas all other 168 abstracts failed to mention important adverse events or side effects (item  
275 *12 Harms*). Other meta-epidemiological studies found considerably higher proportions of



276 adequate reporting for this item, particularly trials that also included pharmacologic interventions.  
277 [27, 35, 45]

278 Finally, our study showed that about 12% of abstracts adequately reported the item *15 Funding*.  
279 Many meta-epidemiological studies even found the proportion of abstracts that adequately report  
280 funding is in the single digits [21, 31, 34, 38, 41, 47, 52, 63] or even zero percent. [30, 32, 33, 35,  
281 36, 39, 42, 46, 50, 51, 61, 64] However, it may be rather the journal regulations than CONSORT  
282 to influence whether funding information appears in the abstract or in another place, for example  
283 at the end of the manuscript.

#### 284 4.1.4 Associations with overall reporting quality

285 We found that most of the trial and journal characteristics investigated in our study were  
286 associated with overall abstract reporting quality.

287 In line with previous findings,[29, 40–42, 47, 63] we observed that overall reporting quality  
288 increases with the number of authors. In contrast, some studies found no such relationship.[21,  
289 37, 47, 51, 61, 62] Other studies suggest, although not consistently[65], that the involvement of  
290 methodologists is associated with higher reporting quality.[57, 66, 67] However, number of authors  
291 may reflect at least to some extent whether author groups include methodologists.

292 Our data suggests that a higher journal impact factor correlates with increased overall reporting  
293 quality. If the impact factor is an indicator for journal quality,[68] journals with a higher impact factor  
294 may apply more rigorous quality control to reporting. This result would thus underline that  
295 restricting studies to top journals may hamper generalizability.

296 We observed that structured abstracts showed higher overall reporting quality compared to  
297 unstructured abstracts. With some exceptions,[16, 41, 47, 49, 61] many meta-epidemiological  
298 studies have shown similar results both since [21, 29, 37, 40, 42, 43, 51, 52] and before the

1  
2  
3 299 publication of CONSORT-A.[69–75] However, few studies also suggest that structured abstracts  
4  
5 300 are not superior [76–78] and that abstract structure was unrelated to reporting quality.[79]  
6  
7

8 301 It may take time for guidelines to spread and be applied by authors, reviewers and editors. Our  
9  
10 302 data provide some indication that overall reporting quality is improving over time: although the  
11  
12 303 RQS remained basically unchanged between 2003 and 2007, a clear increase was observed in  
13  
14 304 the period between 2008 and 2020. Guo et al. reported a significant increase of reporting quality  
15  
16 305 per year between 1984 and 2010. [43] Chhapola et al. similarly found positive temporal trends  
17  
18 306 when comparing the slopes of reporting quality of 2003 to 2007 vs. 2010 to 2014.[80] Menne et  
19  
20 307 al. analysed reporting quality between 2016 and 2021 and observed no increase of reporting  
21  
22 308 quality over these years. [52] However, most studies observed that abstract reporting quality was  
23  
24 309 higher in the period after publication compared to the period prior to CONSORT-A publication. [21,  
25  
26 310 27, 30, 35, 39, 41, 42]  
27  
28

## 29 311 **4.2 Strengths and limitations**

31  
32 312 This study is the first on reporting quality of trial abstracts in childhood depression prevention. Key  
33  
34 313 strength of our study is the topic-based approach we have chosen; compared to journal-based  
35  
36 314 studies, our results provide a more complete picture of abstract reporting in the field. We carried  
37  
38 315 out an extensive, reproducible methodology to screen the literature for eligible studies and retrieve  
39  
40 316 study information. We analysed abstracts published over a broad timespan allowing for  
41  
42 317 comparison of reporting quality before and after publication of CONSORT guidelines. We assess  
43  
44 318 adherence not only to CONSORT-A for RCT abstracts but also to CONSORT-C for CRT abstracts,  
45  
46 319 which was not evaluated by any prior study.  
47  
48

49 320 We applied CONSORT to measure reporting quality, although it was not designed for this purpose.  
50  
51 321 However, in the current absence of standardized tools for assessment, validated guidelines such  
52  
53 322 as CONSORT are the best available choice to evaluate reporting quality. Moreover, CONSORT  
54  
55 323 for social and psychological interventions were not checked for adherence. [81, 82] However,  
56  
57  
58  
59

1  
2  
3 324 these guidelines were only published in 2017 and 2018, respectively, and thus few studies could  
4  
5 325 have considered these standards. We assess the reporting quality of trial abstracts and cannot  
6  
7 326 draw conclusions about the quality of reporting in the main text. Reviewers were not blinded to  
8  
9 327 trial and journal characteristics such as authors, publication date and impact factor, during the  
10  
11 328 study selection and the data extraction. We can therefore not exclude the possibility of bias in the  
12  
13 329 evaluation due to metadata insight of the judging reviewers.  
14  
15

16 330 When we calculated overall reporting quality scores, we treated each CONSORT item equally,  
17  
18 331 although some items could be more or less relevant than others.[31, 38, 44] These scores are  
19  
20 332 simplified proxies to represent reporting quality with a single measure. The assessment of  
21  
22 333 reporting quality should however primarily be based on the individual items. [32]  
23  
24

25 334 We used descriptive modelling to explore factors associated of reporting quality; neither predictive  
26  
27 335 nor causal conclusions can be derived from this. Unmeasured factors such as journal  
28  
29 336 endorsement of CONSORT [83] may also be associated with reporting quality. Findings from our  
30  
31 337 secondary research aim may thus be incomplete and should be interpreted with caution.  
32  
33

### 34 338 **4.3 Conclusions**

35  
36  
37 339 CONSORT extensions are valuable tools for authors, reviewers and editors to formulate trial  
38  
39 340 abstracts in a transparent and comprehensible way. Although these tools have been openly  
40  
41 341 available for years, the reporting quality of RCT and CRT abstracts on the prevention of  
42  
43 342 depression in children and adolescents remains suboptimal. Of particular concern is inadequate  
44  
45 343 reporting of methodological CONSORT-A items such as *07 Randomization* and *08 Blinding*, which  
46  
47 344 are critical for readers seeking to evaluate reproducibility, validity and utility, since lack of  
48  
49 345 information on allocation concealment or blinding hamper to assess the risks of potential bias.  
50  
51 346 Another issue of particular concern is poor reporting of CONSORT-A item *12 Harms*. Side effects  
52  
53 347 are reported more commonly in pharmacological studies than in social or psychological studies,  
54  
55  
56  
57  
58  
59  
60

1  
2  
3 348 [84] however, unintended adverse effects may also occur in social or psychological studies and  
4  
5 349 should therefore also be reported in the corresponding abstracts.[82]  
6  
7

8 350 Some CONSORT-A and -C items such as *05 Objective* are adequately reported in most  
9  
10 351 depression prevention trial abstracts, and this should be the benchmark for all items. Interventions  
11  
12 352 aimed at strengthening abstract reporting quality are thus needed. According to Blanco et al., such  
13  
14 353 interventions should aim to train authors, reviewers and editors on the practical use of CONSORT  
15  
16 354 and its extensions.[85] Moreover, academic institutions could promote CONSORT and other  
17  
18 355 reporting guidelines. Further interventions proposed by Blanco and colleagues would aim to  
19  
20 356 improve understanding, encourage and check adherence, as performed by our study, provide  
21  
22 357 critical feedback and involve methodology experts in the publication process.[85] These efforts  
23  
24 358 will very likely not only benefit the scientific community and practitioners in the field, but may  
25  
26 359 ultimately improve mental health care for children and adolescents worldwide.  
27  
28  
29

30 360  
31  
32 361 **Funding statement.** This research received no specific grant from any funding agency in the  
33  
34 362 public, commercial or not-for-profit sectors.  
35  
36

37 363 **Authors' contributions.** JW is the guarantor. JW conceived the idea for the project. JW and CP  
38  
39 364 developed the concept and methods. JW and JN performed the data selection and extraction. CP  
40  
41 365 gave final instructions when consensus could not be reached. JW performed the statistical  
42  
43 366 analysis and interpreted the study findings. JW drafted the first version of the manuscript. CP  
44  
45 367 contributed to data interpretation, writing, and editing. All authors reviewed and approved the final  
46  
47 368 manuscript before submission.  
48  
49

50  
51 369 **Ethics.** We analysed information from published abstracts and not from human subjects or  
52  
53 370 animals. Therefore, ethics committee approval is not required for this study.  
54  
55  
56  
57  
58  
59

371 **Registration.** Even though reporting quality may indirectly affect patient care in the long-term, we  
372 did not assess outcomes of direct patient or clinical relevance. As this is a pre-requisite for  
373 registration, we could not register this study in the international prospective register of systematic  
374 reviews database (PROSPERO).

375 **Competing interests' statement.** All authors declare that they have no competing interests  
376 regarding the publication of this article.

377 **Acknowledgements.** We would like to thank Dr Jan Taubitz at the Medical Library, Charité -  
378 Universitätsmedizin Berlin, who with his expertise provided support for the research project in the  
379 development and evaluation of the literature search strategy.

380 **Reporting guidelines.** Strictly speaking, meta-epidemiological studies are not systematic  
381 reviews. [86] Nevertheless, we used an adapted version of the Preferred Reporting Items for  
382 Systematic Reviews and Meta-Analyses (PRISMA) checklist to report our research (see PRISMA  
383 checklist available from the OSF repository). [87]

384 **Data sharing statement.** Statistical code and dataset available from the OSF repository, DOI:  
385 [https://osf.io/ahzwn/?view\\_only=e2f08c5c0d2d4936ba88d38968aba5d9](https://osf.io/ahzwn/?view_only=e2f08c5c0d2d4936ba88d38968aba5d9)

386 **Keywords.** Meta-research, methodology research, quality of reporting, mental health, paediatrics,  
387 psychiatry, psychology

388 Additional MeSH: Depression, Research Report, Reproducibility of Results, Checklist, Reference  
389 Standards, Quality Control, Child, Adolescent

## 390 **FIGURES AND ILLUSTRATIONS**

391 Figure 1: PRISMA flowchart depicting the study selection process.

392 Figure 2: Percentage of abstracts adhering to CONSORT items in 169 trial reports on the  
393 prevention of depression in children and adolescents.

1  
2  
3 394 Figure 3: Distribution of overall reporting quality by study design.  
4

5  
6 395 Figure 4: Associations of overall reporting quality with abstract and journal characteristics.  
7  
8  
9  
10  
11  
12  
13  
14  
15  
16  
17  
18  
19  
20  
21  
22  
23  
24  
25  
26  
27  
28  
29  
30  
31  
32  
33  
34  
35  
36  
37  
38  
39  
40  
41  
42  
43  
44  
45  
46  
47  
48  
49  
50  
51  
52  
53  
54  
55  
56  
57  
58  
59  
60

396 **REFERENCES**

- 397 1 Brown SD, Farrow D, Hill DF, et al. A Duty to Describe. *Perspect Psychol Sci*  
398 2014;9(6):626–40.
- 399 2 Simera, I., Moher, D., Hirst, A., Hoey, J., Schulz, K. F., & Altman, D. G. Transparent and  
400 accurate reporting increases reliability, utility, and impact of your research: reporting  
401 guidelines and the EQUATOR Network. *BMC medicine* 2010;8(24).
- 402 3 Chalmers I, Glasziou P. Avoidable waste in the production and reporting of research  
403 evidence. *The Lancet* 2009;374(9683):86–89.
- 404 4 Altman DG, Moher D. Importance of Transparent Reporting of Health Research. In: Moher  
405 D, Altman DG, Schulz KF, et al., eds. *Guidelines for Reporting Health Research: A User's*  
406 *Manual*: John Wiley & Sons, Ltd 2014:1–13.
- 407 5 Begg C. Improving the Quality of Reporting of Randomized Controlled Trials. *JAMA*  
408 1996;276(8):637.
- 409 6 Moher D, Schulz KF, Altman DG. The CONSORT statement: revised recommendations for  
410 improving the quality of reports of parallel-group randomised trials. *The Lancet*  
411 2001;357(9263):1191–94.
- 412 7 Schulz KF, Altman DG, Moher D. CONSORT 2010 Statement: updated guidelines for  
413 reporting parallel group randomised trials. *BMJ* 2010;340(mar23 1):c332-c332.
- 414 8 Moher D, Hopewell S, Schulz KF, et al. CONSORT 2010 Explanation and Elaboration:  
415 updated guidelines for reporting parallel group randomised trials. *BMJ* 2010;340(mar23  
416 1):c869-c869.
- 417 9 Hopewell S, Clarke M, Moher D, et al. CONSORT for reporting randomised trials in journal  
418 and conference abstracts. *The Lancet* 2008;371(9609):281–83.
- 419 10 Hopewell S, Clarke M, Moher D, et al. CONSORT for Reporting Randomized Controlled  
420 Trials in Journal and Conference Abstracts: Explanation and Elaboration. *JAMA*  
421 2008;5(1):e20.

- 1  
2  
3 422 11 Campbell MK, Piaggio G, Elbourne DR, et al. Consort 2010 statement: extension to cluster  
4  
5 423 randomised trials. *BMJ* 2012;345(sep04 1):e5661-e5661.  
6  
7 424 12 Dechartres A, Trinquart L, Atal I, et al. Evolution of poor reporting and inadequate methods  
8  
9 425 over time in 20 920 randomised controlled trials included in Cochrane reviews: research on  
10  
11 426 research study. *BMJ* 2017:j2490.  
12  
13 427 13 Turner L, Shamseer L, Altman DG, et al. Does use of the CONSORT Statement impact the  
14  
15 428 completeness of reporting of randomised controlled trials published in medical journals? A  
16  
17 429 Cochrane review. *Systematic Reviews* 2012;1(1):60. [https://doi.org/10.1186/2046-4053-1-](https://doi.org/10.1186/2046-4053-1-60)  
18  
19 430 60.  
20  
21 431 14 Moher D, Jones A, Lepage L, et al. Use of the CONSORT Statement and Quality of  
22  
23 432 Reports of Randomized Trials. *JAMA* 2001;285(15):1992.  
24  
25 433 15 Berwanger O, Ribeiro RA, Finkelsztejn A, et al. The quality of reporting of trial abstracts is  
26  
27 434 suboptimal: Survey of major general medical journals. *J Clin Epidemiol* 2009;62(4):387–92.  
28  
29 435 16 Ghimire S, Kyung E, Kang W, et al. Assessment of adherence to the CONSORT statement  
30  
31 436 for quality of reports on randomized controlled trial abstracts from four high-impact general  
32  
33 437 medical journals. *Trials* 2012;13(1):77. <https://doi.org/10.1186/1745-6215-13-77>.  
34  
35 438 17 Samaan Z, Mbuagbaw L, Kosa S, et al. A systematic scoping review of adherence to  
36  
37 439 reporting guidelines in health care literature. *JMDH* 2013:169.  
38  
39 440 18 Stinson JN. Clinical Trials in the Journal of Pediatric Psychology: Applying the CONSORT  
40  
41 441 Statement. *Journal of Pediatric Psychology* 2003;28(3):159–67.  
42  
43 442 19 Han C, Kwak K, Marks DM, et al. The impact of the CONSORT statement on reporting of  
44  
45 443 randomized clinical trials in psychiatry. *Contemporary Clinical Trials* 2009;30(2):116–22.  
46  
47 444 20 Grant SP, Mayo-Wilson E, Melendez-Torres GJ, et al. Reporting Quality of Social and  
48  
49 445 Psychological Intervention Trials: A Systematic Review of Reporting Guidelines and Trial  
50  
51 446 Publications. *PLoS One* 2013;8(5):e65442.  
52  
53  
54  
55  
56  
57  
58  
59  
60



- 1  
2  
3 447 21 Song SY, Kim B, Kim I, et al. Assessing reporting quality of randomized controlled trial  
4  
5 448 abstracts in psychiatry: Adherence to CONSORT for abstracts: A systematic review. *PLoS*  
6  
7 449 *One* 2017;12(11):e0187807.  
8  
9 450 22 Jones TH, Hanney S, Buxton MJ. The information sources and journals consulted or read  
10  
11 451 by UK paediatricians to inform their clinical practice and those which they consider  
12  
13 452 important: a questionnaire survey. *BMC Pediatr* 2007;1. doi:10.1186/1471-2431-7-1  
14  
15 453 [published Online First: 15 January 2007].  
16  
17 454 23 Hua F, Walsh T, Glenn A-M, et al. Structure formats of randomised controlled trial  
18  
19 455 abstracts: a cross-sectional analysis of their current usage and association with  
20  
21 456 methodology reporting. *BMC Med Res Methodol* 2018;18(1):6. doi:10.1186/s12874-017-  
22  
23 457 0469-3 [published Online First: 10 January 2018].  
24  
25 458 24 Shmueli G. To Explain or to Predict? *Statist. Sci.* 2010;25(3):289–310.  
26  
27 459 25 Dechartres A, Charles P, Hopewell S, et al. Reviews assessing the quality or the reporting  
28  
29 460 of randomized controlled trials are increasing over time but raised questions about how  
30  
31 461 quality is assessed. *J Clin Epidemiol* 2011;64(2):136–44.  
32  
33 462 26 Chen Y, Li J, Ai C, et al. Assessment of the quality of reporting in abstracts of randomized  
34  
35 463 controlled trials published in five leading Chinese medical journals. *PLoS One*  
36  
37 464 2010;5(8):e11926. doi:10.1371/journal.pone.0011926 [published Online First: 2 August  
38  
39 465 2010].  
40  
41 466 27 Mbuagbaw L, Thabane M, Vanniyasingam T, et al. Improvement in the quality of abstracts  
42  
43 467 in major clinical journals since CONSORT extension for abstracts: a systematic review.  
44  
45 468 *Contemporary Clinical Trials* 2014;38(2):245–50. doi:10.1016/j.cct.2014.05.012 [published  
46  
47 469 Online First: 23 May 2014].  
48  
49 470 28 Hays M, Andrews M, Wilson R, et al. Reporting quality of randomised controlled trial  
50  
51 471 abstracts among high-impact general medical journals: a review and analysis. *BMJ Open*  
52  
53 472 2016;6(7):e011082.  
54  
55  
56  
57  
58  
59  
60

- 1  
2  
3 473 29 Bigna JJR, Noubiap JJN, Asangbeh SL, et al. Abstracts reporting of HIV/AIDS randomized  
4  
5 474 controlled trials in general medicine and infectious diseases journals: completeness to date  
6  
7 475 and improvement in the quality since CONSORT extension for abstracts. *BMC Med Res*  
8  
9 476 *Methodol* 2016;16(1):138. doi:10.1186/s12874-016-0243-y [published Online First: 13  
10  
11 477 October 2016].
- 13 478 30 Sriganesh K, Bharadwaj S, Wang M, et al. Quality of abstracts of randomized control trials  
14  
15 479 in five top pain journals: A systematic survey. *Contemporary Clinical Trials*  
16  
17 480 *Communications* 2017;7:64–68. doi:10.1016/j.conctc.2017.06.001 [published Online First:  
18  
19 481 9 June 2017].
- 22 482 31 Khan MS, Shaikh A, Ochani RK, et al. Assessing the Quality of Abstracts in Randomized  
23  
24 483 Controlled Trials Published in High Impact Cardiovascular Journals. *Circ: Cardiovascular*  
25  
26 484 *Quality and Outcomes* 2019;12(5):532.
- 28 485 32 Chow JTY, Turkstra TP, Yim E, et al. The degree of adherence to CONSORT reporting  
29  
30 486 guidelines for the abstracts of randomised clinical trials published in anaesthesia journals:  
31  
32 487 A cross-sectional study of reporting adherence in 2010 and 2016. *Eur J Anaesthesiol*  
33  
34 488 2018;942–48. doi:10.1097/EJA.0000000000000880 [published Online First: 17 September  
35  
36 489 2018].
- 39 490 33 Can OS, Yilmaz AA, Hasdogan M, et al. Has the quality of abstracts for randomised  
40  
41 491 controlled trials improved since the release of Consolidated Standards of Reporting Trial  
42  
43 492 guideline for abstract reporting? A survey of four high-profile anaesthesia journals. *Eur J*  
44  
45 493 *Anaesthesiol* 2011;28(7):485–92.
- 47 494 34 Janackovic K, Puljak L. Reporting quality of randomized controlled trial abstracts in the  
48  
49 495 seven highest-ranking anesthesiology journals. *Trials* 2018;19(1):591.  
50  
51 496 <https://pubmed.ncbi.nlm.nih.gov/30373644>.
- 53 497 35 Speich B, Mc Cord KA, Agarwal A, et al. Reporting Quality of Journal Abstracts for Surgical  
54  
55 498 Randomized Controlled Trials Before and After the Implementation of the CONSORT

- 1  
2  
3 499 Extension for Abstracts. *World J Surg* 2019;2371–78. doi:10.1007/s00268-019-05064-1  
4  
5 500 [published Online First: 20 June 2019].  
6  
7 501 36 Gallo L, Wakeham S, Dunn E, et al. The Reporting Quality of Randomized Controlled Trial  
8  
9 502 Abstracts in Plastic Surgery. *Aesthet Surg J* 2020;40(3):335–41.  
10  
11 503 37 Zhang J, RN WS, Ying Y, et al. Abstracts Reporting of Randomized Controlled Trials in Ten  
12  
13 504 Highest-ranking Nursing Journals: Improvement in the Quality Since CONSORT Extension  
14  
15 505 for Abstracts 2021.  
16  
17 506 38 Kuriyama A, Takahashi N, Nakayama T. Reporting of critical care trial abstracts: a  
18  
19 507 comparison before and after the announcement of CONSORT guideline for abstracts.  
20  
21 508 *Trials* 2017;18(1):32. doi:10.1186/s13063-017-1786-x [published Online First: 21 January  
22  
23 509 2017].  
24  
25 510 39 Cui Q, Tian J, Song X, et al. Does the CONSORT checklist for abstracts improve the  
26  
27 511 quality of reports of randomized controlled trials on clinical pathways? *J Eval Clin Pract*  
28  
29 512 2014;20(6):827–33. doi:10.1111/jep.12200 [published Online First: 11 June 2014].  
30  
31 513 40 Wang D, Chen L, Wang L, et al. Abstracts for reports of randomized trials of COVID-19  
32  
33 514 interventions had low quality and high spin. *J Clin Epidemiol* 2021;139:107–20.  
34  
35 515 41 Hua F, Deng L, Kau CH, et al. Reporting quality of randomized controlled trial abstracts.  
36  
37 516 *The Journal of the American Dental Association* 2015;146(9):669-678.e1.  
38  
39 517 42 Chen J, Li Z, Liu B, et al. Quality improvement in randomized controlled trial abstracts in  
40  
41 518 prosthodontics since the publication of CONSORT guideline for abstracts: a systematic  
42  
43 519 review. *J Dent* 2018;23–29. doi:10.1016/j.jdent.2018.04.025 [published Online First: 6 May  
44  
45 520 2018].  
46  
47 521 43 Guo J-W, Iribarren SJ. Reporting quality for abstracts of randomized controlled trials in  
48  
49 522 cancer nursing research. *Cancer Nurs* 2014;37(6):436–44.  
50  
51 523 44 Baulig C, Krummenauer F, Geis B, et al. Reporting quality of randomised controlled trial  
52  
53 524 abstracts on age-related macular degeneration health care: a cross-sectional quantification  
54  
55  
56  
57  
58  
59  
60

- 1  
2  
3 525 of the adherence to CONSORT abstract reporting recommendations. *BMJ Open*  
4  
5 526 2018;8(5):e021912. doi:10.1136/bmjopen-2018-021912 [published Online First: 22 May  
6  
7 527 2018].  
8  
9 528 45 Sivendran S, Newport K, Horst M, et al. Reporting quality of abstracts in phase III clinical  
10  
11 529 trials of systemic therapy in metastatic solid malignancies. *Trials* 2015;16:341.  
12  
13 530 doi:10.1186/s13063-015-0885-9 [published Online First: 8 August 2015].  
14  
15 531 46 Kumar S, Mohammad H, Vora H, et al. Reporting Quality of Randomized Controlled Trials  
16  
17 532 of Periodontal Diseases in Journal Abstracts-A Cross-sectional Survey and Bibliometric  
18  
19 533 Analysis. *J Evid Based Dent Pract* 2018;18(2):130-141.e22.  
20  
21 534 doi:10.1016/j.jebdp.2017.08.005 [published Online First: 21 September 2017].  
22  
23 535 47 Fang X, Hua F, Riley P, et al. Abstracts of published randomized controlled trials in  
24  
25 536 Endodontics: reporting quality and spin. *Int Endod J* 2020;53(8):1050–61.  
26  
27 537 48 Shaqman M, Al-Abedalla K, Wagner J, et al. Reporting quality and spin in abstracts of  
28  
29 538 randomized clinical trials of periodontal therapy and cardiovascular disease outcomes.  
30  
31 539 *PLoS One* 2020;15(4):e0230843. <https://doi.org/10.1371/journal.pone.0230843>.  
32  
33 540 49 Knippschild S, Loddenkemper J, Tulka S, et al. Assessment of reporting quality in  
34  
35 541 randomised controlled clinical trial abstracts of dental implantology published from 2014 to  
36  
37 542 2016. *BMJ Open* 2021;11(8):e045372.  
38  
39 543 50 Wang L, Li Y, Li J, et al. Quality of reporting of trial abstracts needs to be improved: using  
40  
41 544 the CONSORT for abstracts to assess the four leading Chinese medical journals of  
42  
43 545 traditional Chinese medicine. *Trials* 2010;11:75.  
44  
45 546 <https://pubmed.ncbi.nlm.nih.gov/20615225>.  
46  
47 547 51 Jin L, Hua F, Cao Q. Reporting quality of randomized controlled trial abstracts published in  
48  
49 548 leading laser medicine journals: an assessment using the CONSORT for abstracts  
50  
51 549 guidelines. *Lasers Med Sci* 2016;31(8):1583–90. doi:10.1007/s10103-016-2018-4  
52  
53 550 [published Online First: 30 June 2016].  
54  
55  
56  
57  
58  
59  
60

- 1  
2  
3 551 52 Menne MC, Pandis N, Faggion CM. Reporting quality of abstracts of randomized controlled  
4  
5 552 trials related to implant dentistry. *J Periodontol* 2021.  
6  
7 553 53 Goodyer I, Dubicka B, Wilkinson P, et al. Selective serotonin reuptake inhibitors (SSRIs)  
8  
9 554 and routine specialist care with and without cognitive behaviour therapy in adolescents with  
10  
11 555 major depression: randomised controlled trial. *BMJ* 2007;335(7611):142.  
12  
13 556 <https://pubmed.ncbi.nlm.nih.gov/17556431>.  
14  
15 557 54 Richardson LP, Ludman E, McCauley E, et al. Collaborative care for adolescents with  
16  
17 558 depression in primary care: a randomized clinical trial. *JAMA* 2014;312(8):809–16.  
18  
19 559 <https://pubmed.ncbi.nlm.nih.gov/25157724>.  
20  
21 560 55 Chan CL, Leyrat C, Eldridge SM. Quality of reporting of pilot and feasibility cluster  
22  
23 561 randomised trials: a systematic review. *BMJ Open* 2017;7(11):e016970.  
24  
25 562 56 Ivers NM, Taljaard M, Dixon S, et al. Impact of CONSORT extension for cluster  
26  
27 563 randomised trials on quality of reporting and study methodology: review of random sample  
28  
29 564 of 300 trials, 2000-8. *BMJ* 2011;343:d5886.  
30  
31 565 57 Diaz-Ordaz K, Froud R, Sheehan B, et al. A systematic review of cluster randomised trials  
32  
33 566 in residential facilities for older people suggests how to improve quality. *BMC Med Res*  
34  
35 567 *Methodol* 2013;13(1):127. <https://doi.org/10.1186/1471-2288-13-127>.  
36  
37 568 58 Walleser S, Hill SR, Bero LA. Characteristics and quality of reporting of cluster randomized  
38  
39 569 trials in children: reporting needs improvement. *J Clin Epidemiol* 2011;64(12):1331–40.  
40  
41 570 59 Hua F, Sun Q, Zhao T, et al. Reporting quality of randomised controlled trial abstracts  
42  
43 571 presented at the SLEEP Annual Meetings: a cross-sectional study. *BMJ Open*  
44  
45 572 2019;9(7):e029270. doi:10.1136/bmjopen-2019-029270 [published Online First: 16 July  
46  
47 573 2019].  
48  
49 574 60 Yoon U, Knobloch K. Quality of reporting in sports injury prevention abstracts according to  
50  
51 575 the CONSORT and STROBE criteria: an analysis of the World Congress of Sports Injury  
52  
53  
54  
55  
56  
57  
58  
59  
60

- 1  
2  
3 576 Prevention in 2005 and 2008. *Br J Sports Med* 2012;46(3):202–06.  
4  
5 577 doi:10.1136/bjism.2008.053876 [published Online First: 26 July 2009].  
6  
7 578 61 Fleming PS, Buckley N, Seehra J, et al. Reporting quality of abstracts of randomized  
8  
9 579 controlled trials published in leading orthodontic journals from 2006 to 2011. *Am J Orthod*  
10  
11 580 *Dentofacial Orthop* 2012;142(4):451–58.  
12  
13 581 62 Seehra J, Wright NS, Polychronopoulou A, et al. Reporting quality of abstracts of  
14  
15 582 randomized controlled trials published in dental specialty journals. *J Evid Based Dent Pract*  
16  
17 583 2013;13(1):1–8.  
18  
19 584 63 Kiriakou J, Pandis N, Madianos P, et al. Assessing the reporting quality in abstracts of  
20  
21 585 randomized controlled trials in leading journals of oral implantology. *J Evid Based Dent*  
22  
23 586 *Pract* 2014;14(1):9–15. doi:10.1016/j.jebdp.2013.10.018 [published Online First: 19  
24  
25 587 December 2013].  
26  
27 588 64 Faggion Jr. CM, Giannakopoulos NN. Quality of Reporting in Abstracts of Randomized  
28  
29 589 Controlled Trials Published in Leading Journals of Periodontology and Implant Dentistry: A  
30  
31 590 Survey. *J Periodontol* 2012;83(10):1251–56.  
32  
33 591 65 Péron J, You B, Gan HK, et al. Influence of statistician involvement on reporting of  
34  
35 592 randomized clinical trials in medical oncology. *Anticancer Drugs* 2013;24(3):306–09.  
36  
37 593 66 Kloukos D, Papageorgiou SN, Doulis I, et al. Reporting quality of randomised controlled  
38  
39 594 trials published in prosthodontic and implantology journals. *J Oral Rehabil*  
40  
41 595 2015;42(12):914–25.  
42  
43 596 67 Pandis N, Polychronopoulou A, Eliades T. An assessment of quality characteristics of  
44  
45 597 randomised control trials published in dental journals. *J Dent* 2010;38(9):713–21.  
46  
47 598 <https://www.sciencedirect.com/science/article/pii/S0300571210001235>.  
48  
49 599 68 Saha S, Saint S, Christakis DA. Impact factor: a valid measure of journal quality? *J Med*  
50  
51 600 *Libr Assoc* 2003;91(1):42–46. <https://pubmed.ncbi.nlm.nih.gov/12572533>.  
52  
53  
54  
55  
56  
57  
58  
59  
60

- 1  
2  
3 601 69 Trakas K, Addis A, Kruk D, et al. Quality Assessment of Pharmacoeconomic Abstracts of  
4  
5 602 Original Research Articles in Selected Journals. *Annals of Pharmacotherapy*  
6  
7 603 1997;31(4):423–28.  
8  
9 604 70 McIntosh N. Abstract information and structure at scientific meetings. *The Lancet*  
10  
11 605 1996;347(9000):544–45.  
12  
13 606 71 Taddio A, Pain T, Fassos FF, et al. Quality of nonstructured and structured abstracts of  
14  
15 607 original research articles in the British Medical Journal, the Canadian Medical Association  
16  
17 608 Journal and the Journal of the American Medical Association. *CMAJ* 1994;150(10):1611–  
18  
19 609 15. <https://pubmed.ncbi.nlm.nih.gov/8174031>.  
20  
21  
22 610 72 Dupuy A, Khosrotehrani K, Lebbé C, et al. Quality of Abstracts in 3 Clinical Dermatology  
23  
24 611 Journals. *Arch Dermatol* 2003;139(5):589–93.  
25  
26 612 73 Burns KEA, Adhikari NKJ, Kho M, et al. Abstract reporting in randomized clinical trials of  
27  
28 613 acute lung injury: An audit and assessment of a quality of reporting score\*. *Critical Care*  
29  
30 614 *Medicine* 2005;33(9).  
31  
32 615 74 Sandeep Sharma, Jayne E. Harrison. Structured abstracts: Do they improve the quality of  
33  
34 616 information in abstracts? *American Journal of Orthodontics and Dentofacial Orthopedics*  
35  
36 617 2006;130(4):523–30. [https://www.ajodo.org/article/S0889-5406\(06\)00893-6/fulltext](https://www.ajodo.org/article/S0889-5406(06)00893-6/fulltext).  
37  
38  
39 618 75 Rosen AB, Greenberg D, Stone PW, et al. Quality of Abstracts of Papers Reporting  
40  
41 619 Original Cost-Effectiveness Analyses. *Medical Decision Making* 2005;25(4):424–28.  
42  
43 620 76 Scherer RW. Reporting of Randomized Clinical Trial Descriptors and Use of Structured  
44  
45 621 Abstracts. *JAMA* 1998;280(3):269.  
46  
47 622 77 Einarson TR, Lee C, Smith R, et al. Quality and content of abstracts in papers reporting  
48  
49 623 about drug exposures during pregnancy. *Birth Defect Res A* 2006;76(8):621–28.  
50  
51 624 78 Khosrotehrani K, Dupuy A, Lebbé C, et al. [Abstract quality assessment of articles from the  
52  
53 625 *Annales de Dermatologie*]. *Annales de dermatologie et de venerologie* 2002;129(11).  
54  
55 626 <https://pubmed.ncbi.nlm.nih.gov/12514515/>.  
56  
57  
58  
59  
60

- 1  
2  
3 627 79 Wong H, Truong D, Mahamed A, et al. Quality of structured abstracts of original research  
4  
5 628 articles in the British Medical Journal, the Canadian Medical Association Journal and the  
6  
7 629 Journal of the American Medical Association: a 10-year follow-up study. *Current Medical*  
8  
9 630 *Research and Opinion* 2005;21(4):467–73.
- 11 631 80 Chhapola V, Tiwari S, Brar R, et al. An interrupted time series analysis showed suboptimal  
12  
13 632 improvement in reporting quality of trial abstract. *J Clin Epidemiol* 2016;71:11–17.
- 15 633 81 Boutron I, Altman DG, Moher D, et al. CONSORT Statement for Randomized Trials of  
16  
17 634 Nonpharmacologic Treatments: A 2017 Update and a CONSORT Extension for  
18  
19 635 Nonpharmacologic Trial Abstracts. *Annals of Internal Medicine* 2017;167(1):40–47.
- 22 636 82 Montgomery P, Grant S, Mayo-Wilson E, et al. Reporting randomised trials of social and  
23  
24 637 psychological interventions: the CONSORT-SPI 2018 Extension. *Trials* 2018;19(1):407.  
25  
26 638 <https://doi.org/10.1186/s13063-018-2733-1>.
- 28 639 83 Sarkis-Onofre R, Poletto-Neto V, Cenci MS, et al. CONSORT endorsement improves the  
29  
30 640 quality of reports of randomized clinical trials in dentistry. *J Clin Epidemiol* 2020;122:20–26.
- 32 641 84 McCord J. Cures That Harm: Unanticipated Outcomes of Crime Prevention Programs. *The*  
33  
34 642 *ANNALS of the American Academy of Political and Social Science* 2003;587(1):16–30.
- 36 643 85 Blanco D, Altman D, Moher D, et al. Scoping review on interventions to improve adherence  
37  
38 644 to reporting guidelines in health research. *BMJ Open* 2019;9(5):e026589.
- 40 645 86 Puljak L. Methodological studies evaluating evidence are not systematic reviews. *J Clin*  
41  
42 646 *Epidemiol* 2019;110:98–99. doi:10.1016/j.jclinepi.2019.02.002 [published Online First: 8  
43  
44 647 February 2019].
- 46 648 87 Murad MH, Wang Z. Guidelines for reporting meta-epidemiological methodology research.  
47  
48 649 *Evid Based Med* 2017;22(4):139–42.
- 50 650 88 Puljak L. Reporting checklist for methodological, that is research on research studies is  
51  
52 651 urgently needed. *J Clin Epidemiol* 2019;112:93. doi:10.1016/j.jclinepi.2019.04.014  
53  
54 652 [published Online First: 24 May 2019].



1  
2  
3 653 89 Lawson, D. O., Puljak, L., Pieper, D., Schandelmaier, S., Collins, G. S., Brignardello-  
4  
5 654 Petersen, R., Moher, D., Tugwell, P., Welch, V. A., Samaan, Z., Thombs, B. D., Norskov,  
6  
7 655 A. K., Jakobsen, J. C., Allison, D. B., Mayo-Wilson, E., Young, T., Chan, A. W., Briel, M.,  
8  
9 656 Guyatt, G. H., Thabane, L., & Mbuagbaw, L. Reporting of methodological studies in health  
10  
11 657 research - a protocol for the development of the Methodological Study reporting Checklist  
12  
13 658 (MISTIC). *BMJ Open* 2020(10).  
14  
15  
16 659

For peer review only

1  
2  
3  
4  
5  
6  
7  
8  
9  
10  
11  
12  
13  
14  
15  
16  
17  
18  
19  
20  
21  
22  
23  
24  
25  
26  
27  
28  
29  
30  
31  
32  
33  
34  
35  
36  
37  
38  
39  
40  
41  
42  
43  
44  
45  
46  
47  
48  
49  
50  
51  
52  
53  
54  
55  
56  
57  
58  
59  
60  
61  
62  
63  
Identification  
Screening  
Eligibility  
Included

Records identified through database search between 01.01.2003 and 09.04.2019 (n= 8,043)

Records identified through database search between 01.01.2003 and 05.08.2020 (n= 9,581)

Additional records identified through hand search (n= 75) and reference lists of previous reviews (n= 328)

Records after duplicates removed (n= 4,279)

Title-Abstract-Screening (n= 4,279)

Records excluded if both reviewers vote 'non-eligible' (n= 3,759)

Full-Text-Screening (n= 520)

Records excluded if both reviewers vote 'non-eligible' (n= 276)

Discussion and consensus (n= 82)

Both reviewers agree to discard the record (n= 67)

No consensus leads to third reviewer decision (n= 10)

Third reviewer decides to discard the record (n= 8)

Third reviewer decides to include the record (n= 2)

Both reviewers vote 'eligible' (n= 162)

Both reviewers agree to include the record (n= 5)

Records included in the data synthesis (n= 169)  
For peer review only - <http://bmjopen.bmj.com/site/about/guidelines.xhtml>

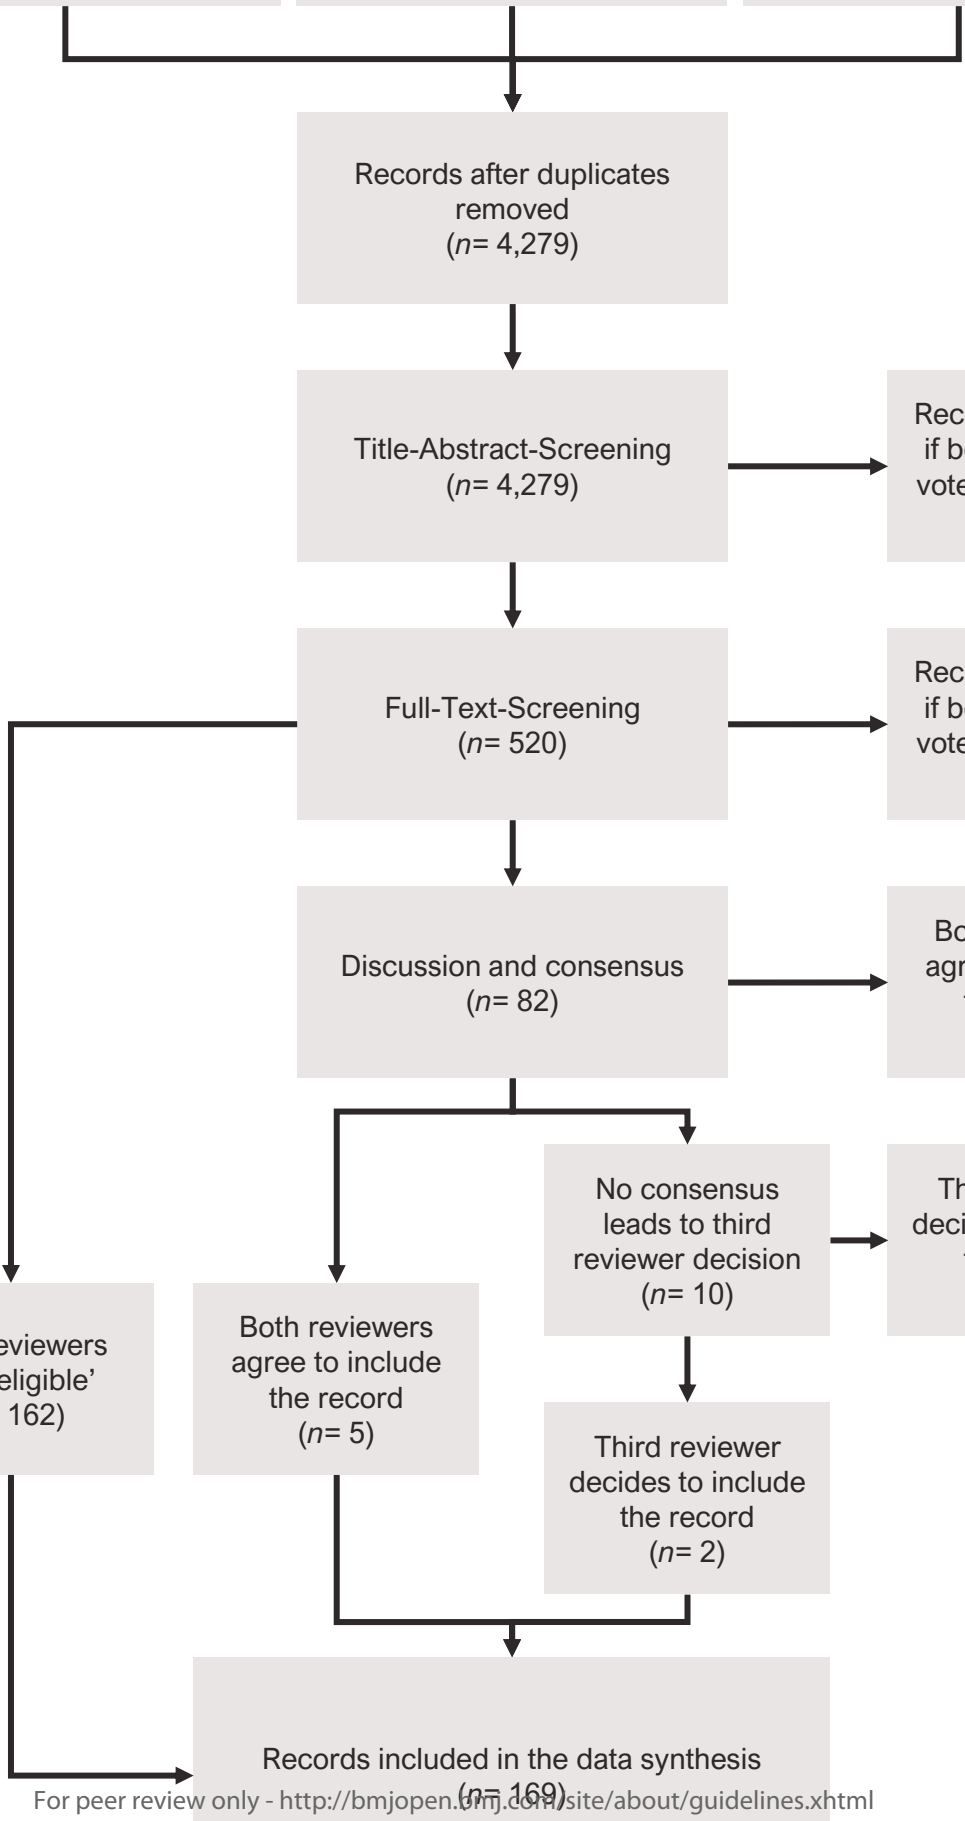

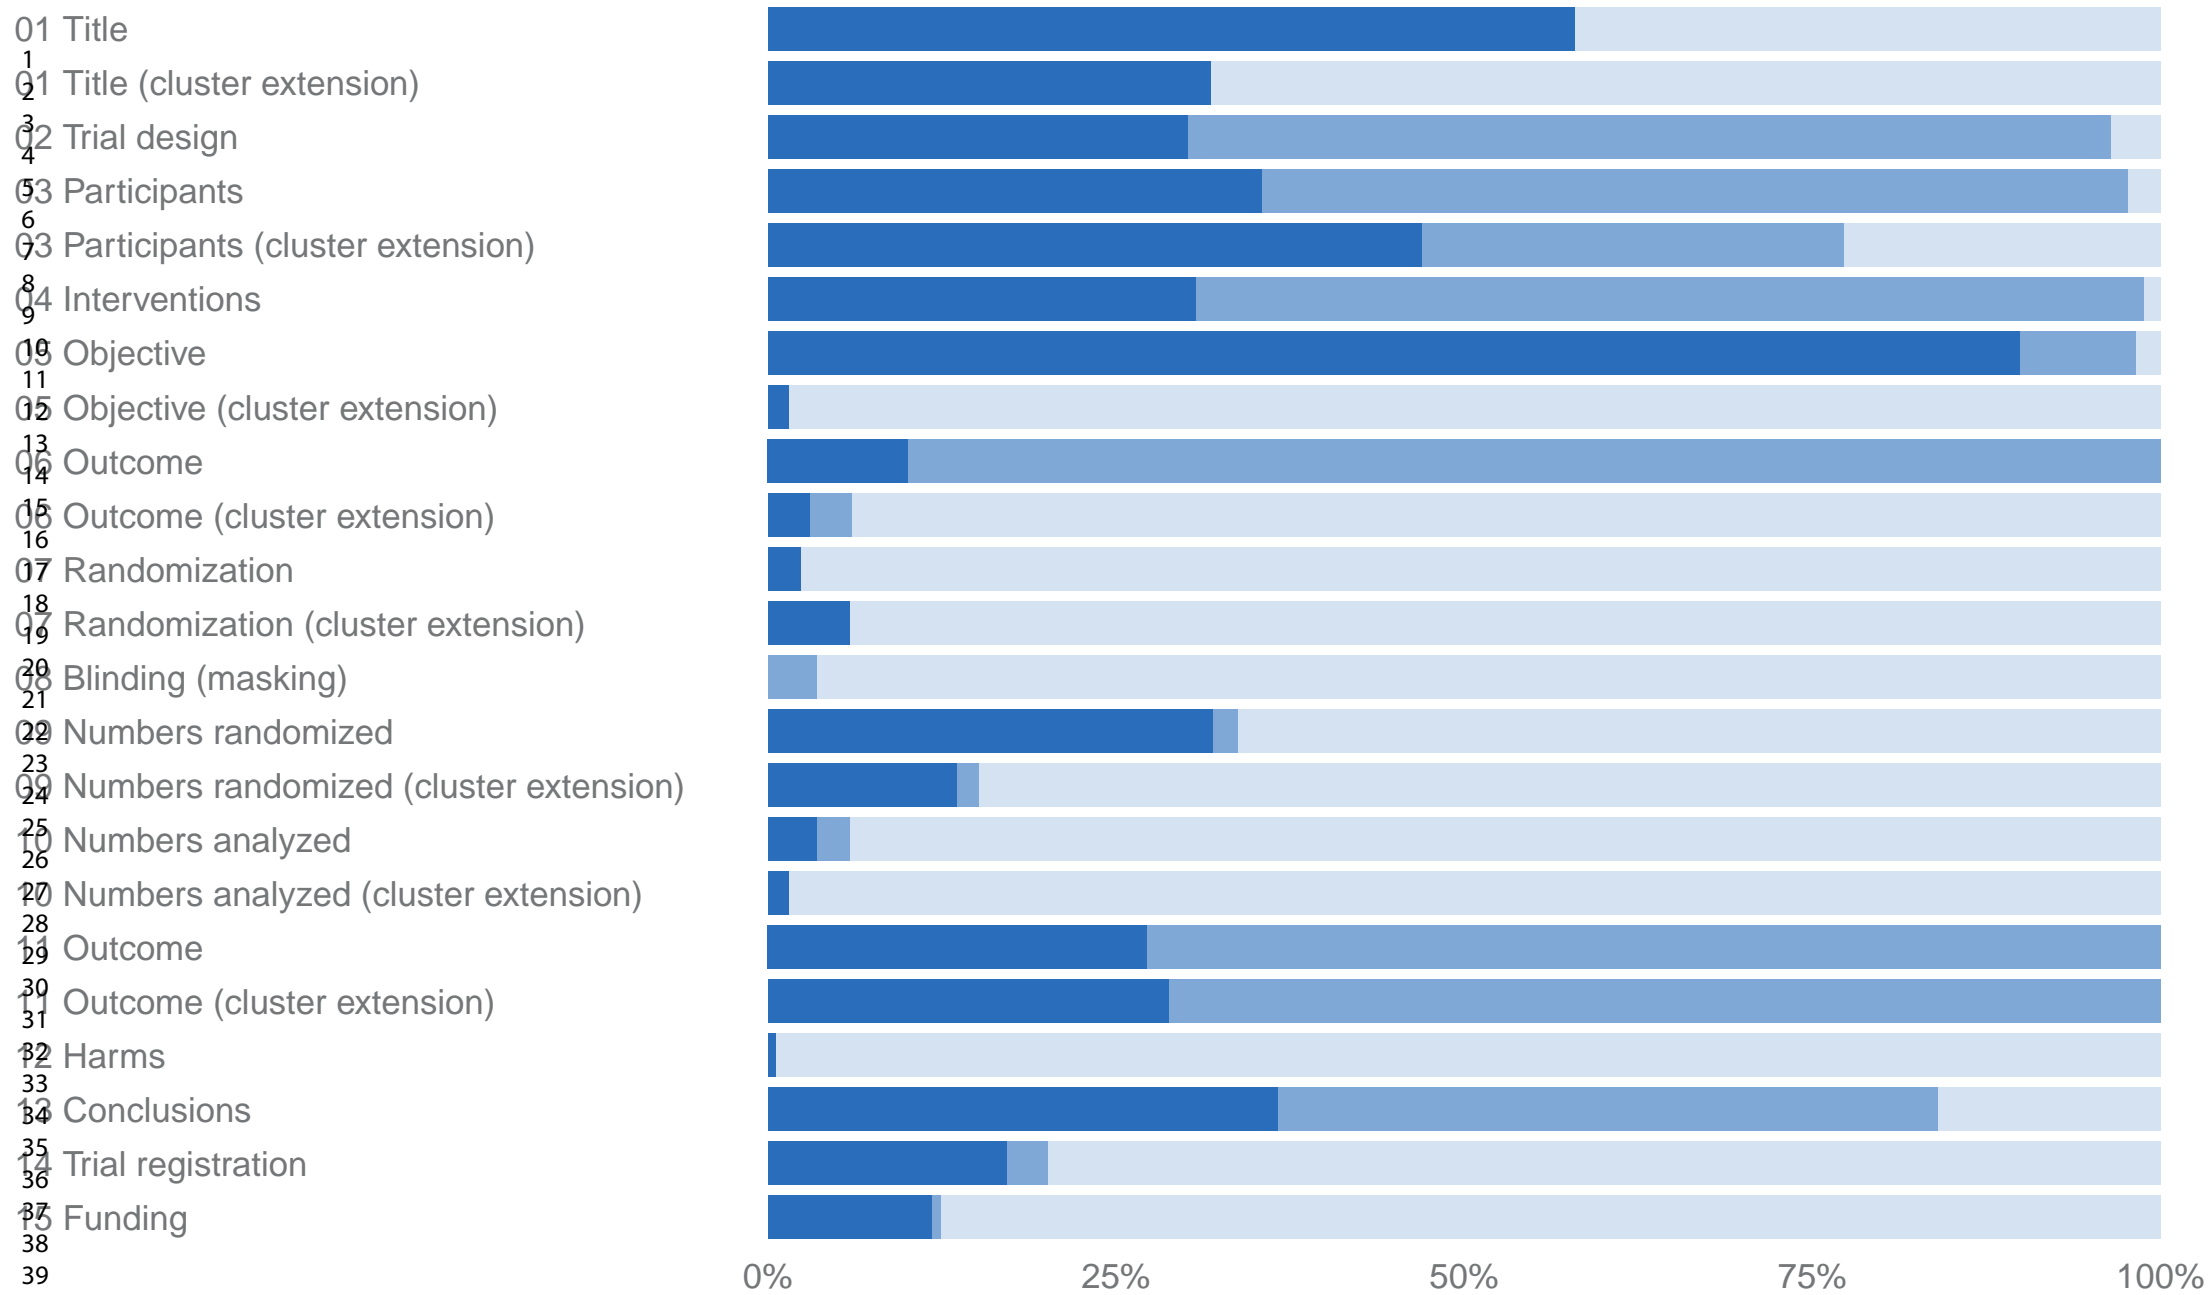

For peer review only - <http://bmjopen.bmj.com/site/about/guidelines.xhtml>

adequately reported    inadequately reported    not reported

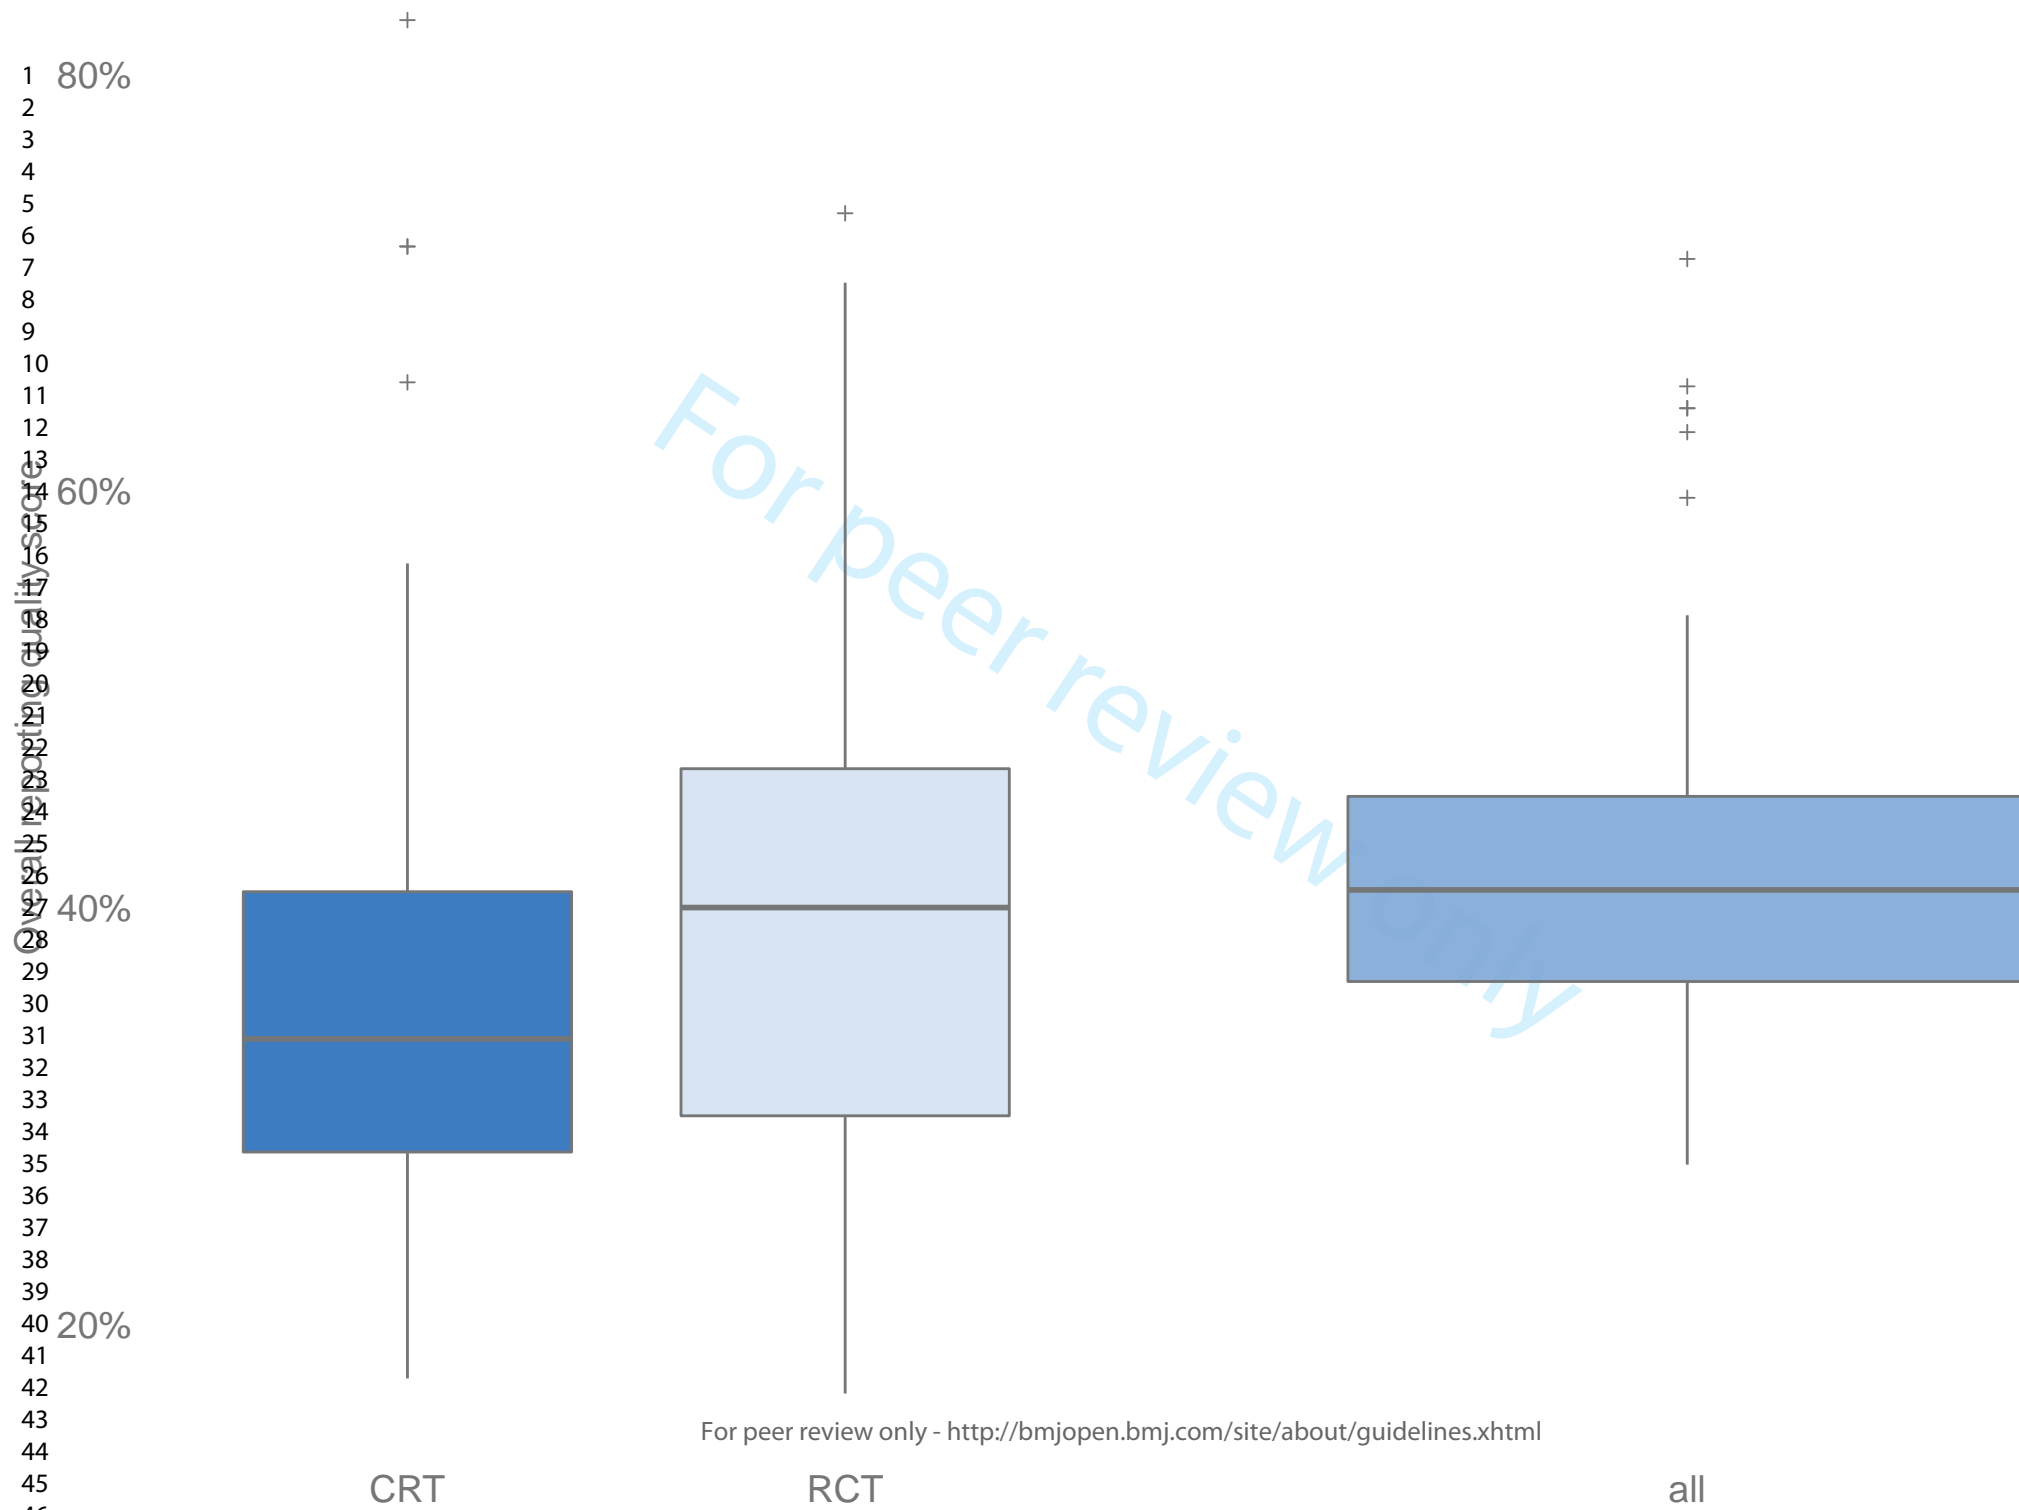

For peer review only - <http://bmjopen.bmj.com/site/about/guidelines.xhtml>

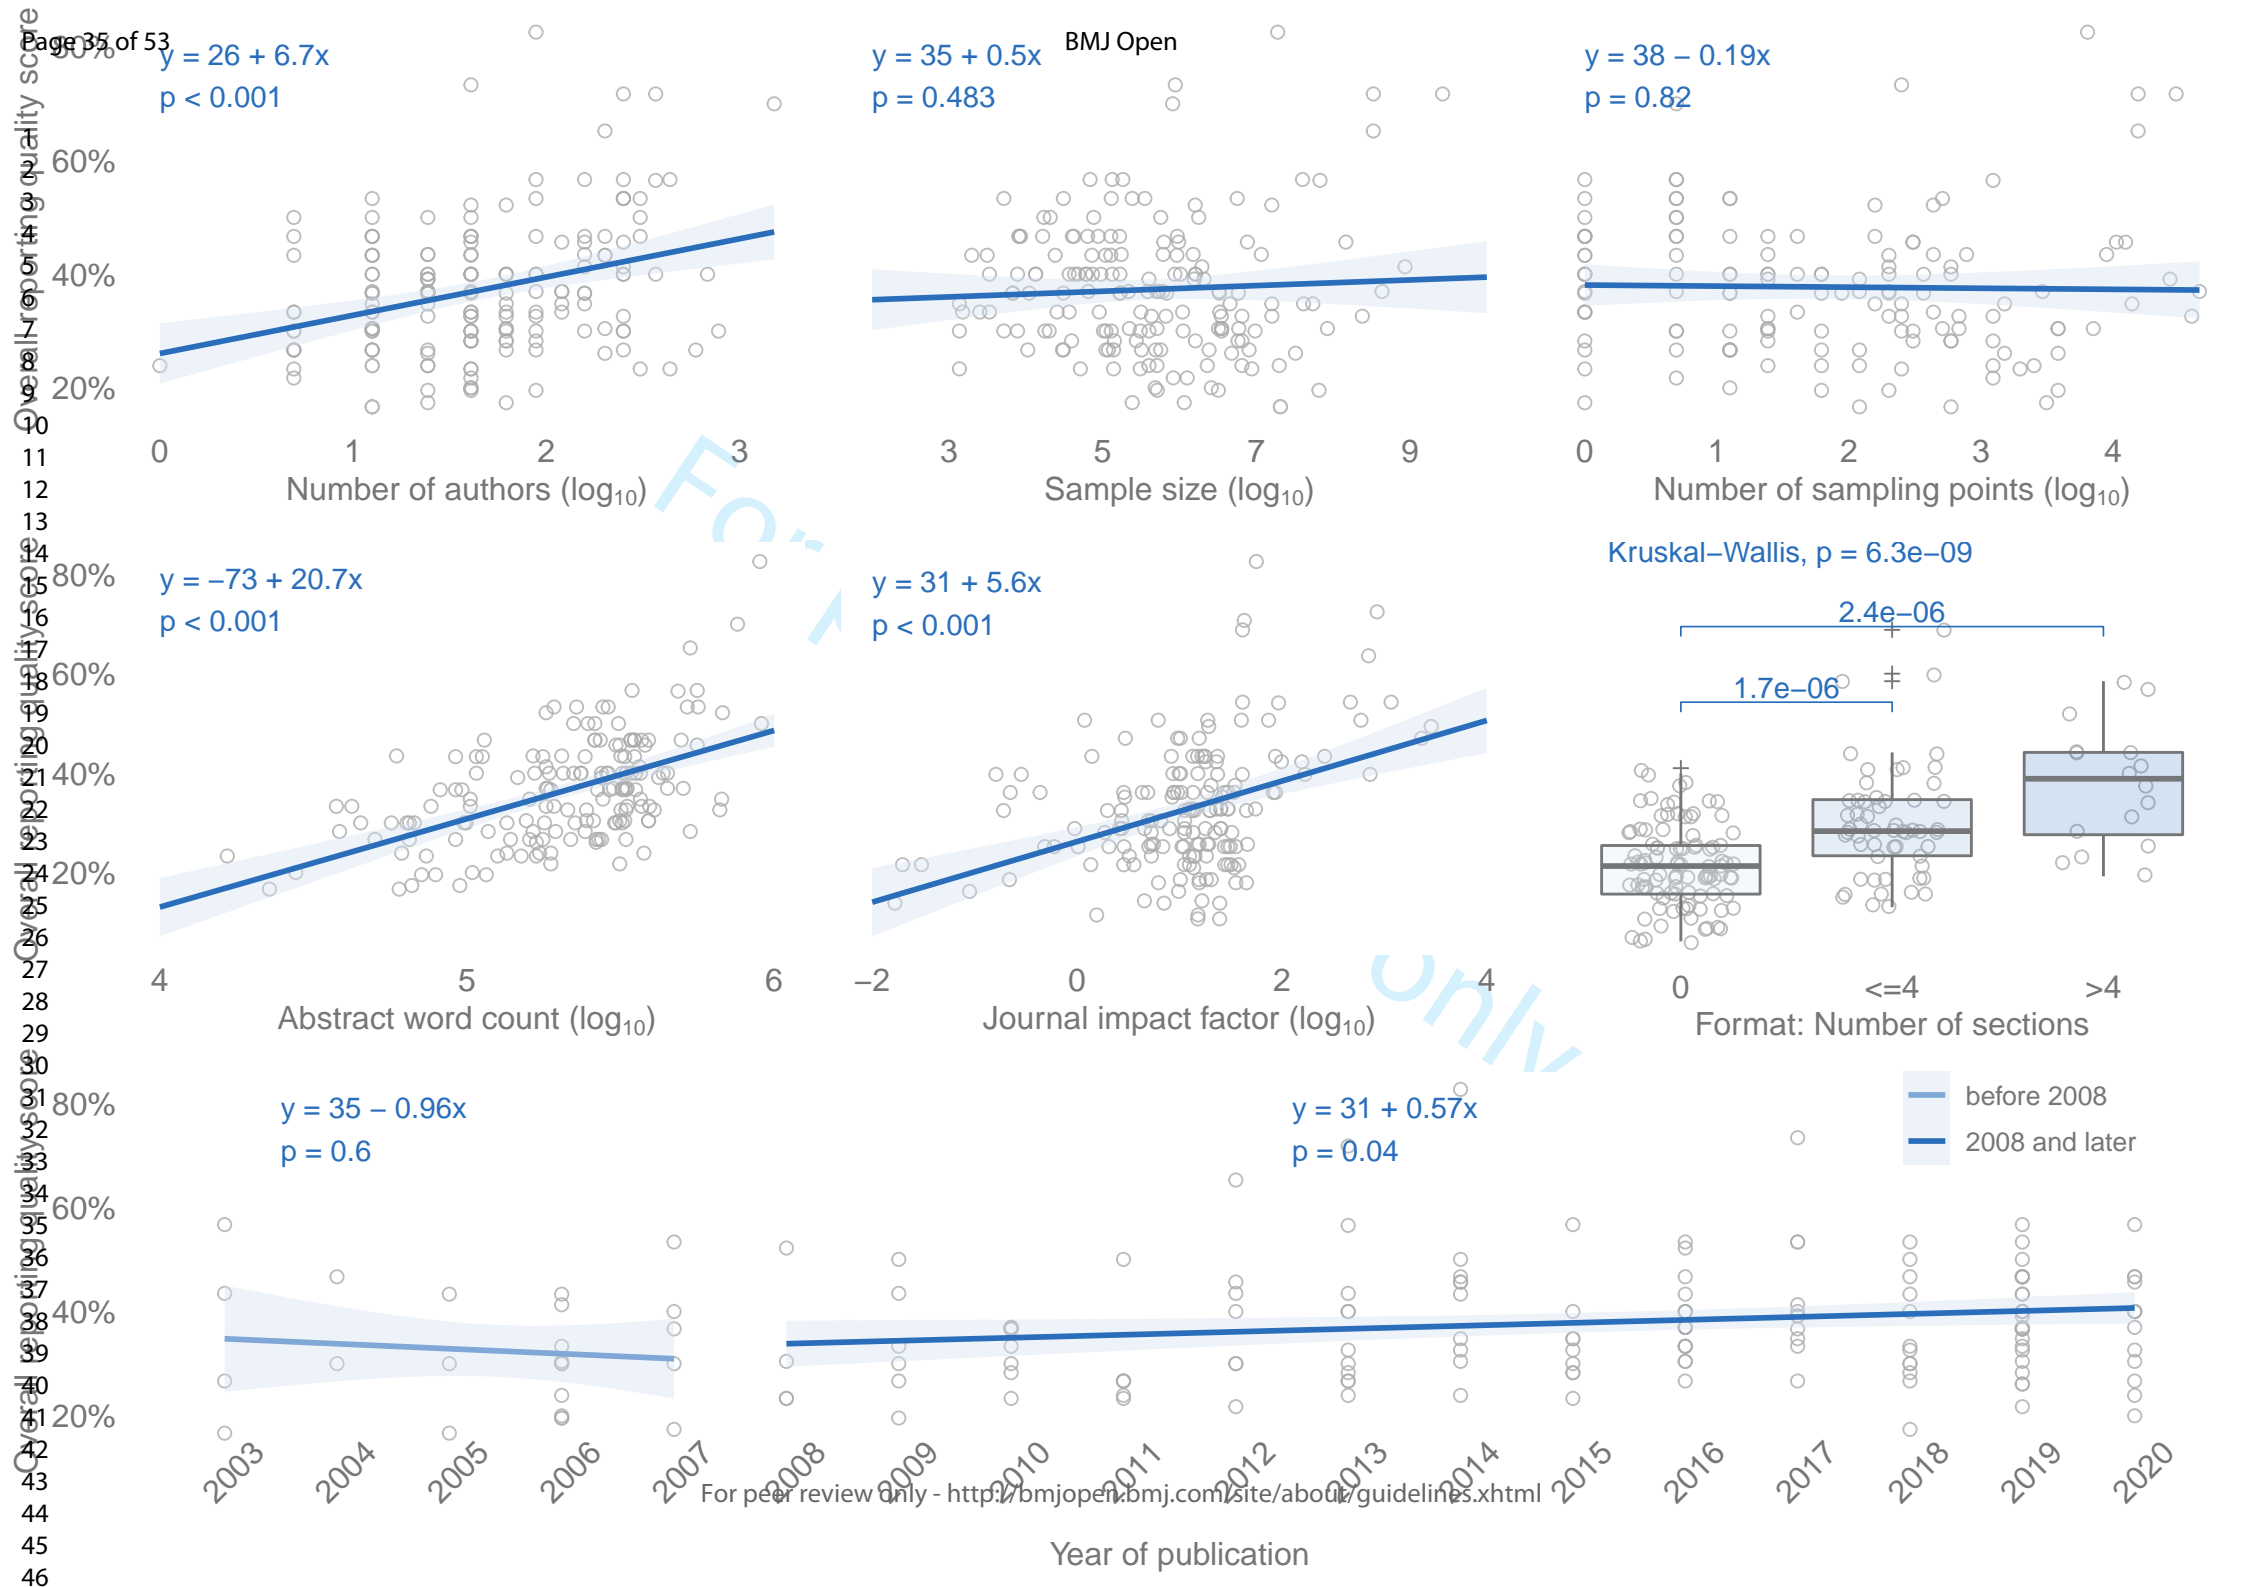

## Supplementary Material

### S 1 Eligibility criteria for the study selection procedure

|              | Inclusion criteria                                                                                                                                                                                                                                                                                                                                                                                                                                                   | Exclusion criteria                                                                                                                                                                                                                                                                                                                         |
|--------------|----------------------------------------------------------------------------------------------------------------------------------------------------------------------------------------------------------------------------------------------------------------------------------------------------------------------------------------------------------------------------------------------------------------------------------------------------------------------|--------------------------------------------------------------------------------------------------------------------------------------------------------------------------------------------------------------------------------------------------------------------------------------------------------------------------------------------|
| Population   | <ul style="list-style-type: none"> <li>• subjects are children or adolescents <math>\leq 18</math> years before treatment initiation (if age range is not available, then use mean age: <math>\leq 18.0</math> years)</li> <li>• clinical or community samples as well as samples drawn from the general population</li> <li>• participants with or without increased risk for depression</li> <li>• participants with or without subthreshold depression</li> </ul> | <ul style="list-style-type: none"> <li>• adult samples (<math>&gt;18</math> years)</li> <li>• clinically depressed samples (<math>\geq 50\%</math> of participants currently meet or formerly met criteria for clinical diagnosis of depression before treatment initiation)</li> </ul>                                                    |
| Intervention | <ul style="list-style-type: none"> <li>• interventions aiming at preventing the onset of depression or reducing depressive symptoms (universal, selective, and indicated prevention)</li> <li>• social, psychological, or educational interventions targeting children and adolescents</li> </ul>                                                                                                                                                                    | <ul style="list-style-type: none"> <li>• interventions aiming at treating depression or preventing its reoccurrence (secondary or tertiary prevention)</li> <li>• interventions only targeting caregiver including any pharmacological and hormonal components or solely relying on music-based or physical activity components</li> </ul> |
| Control      | <ul style="list-style-type: none"> <li>• treatment as usual</li> <li>• wait-list control</li> <li>• attention placebo control</li> <li>• control arm with no treatment</li> </ul>                                                                                                                                                                                                                                                                                    | <ul style="list-style-type: none"> <li>• no control group</li> <li>• drug placebo</li> </ul>                                                                                                                                                                                                                                               |

## S1 Continued

|              | Inclusion criteria                                                                                                                                                                                                                                                                                                                                                                                                                                                                                  | Exclusion criteria                                                                                                                                                                                                                                                                                                                                    |
|--------------|-----------------------------------------------------------------------------------------------------------------------------------------------------------------------------------------------------------------------------------------------------------------------------------------------------------------------------------------------------------------------------------------------------------------------------------------------------------------------------------------------------|-------------------------------------------------------------------------------------------------------------------------------------------------------------------------------------------------------------------------------------------------------------------------------------------------------------------------------------------------------|
| Outcome      | <ul style="list-style-type: none"> <li>outcome assessment before and after treatment initiation</li> <li>meeting diagnostic criteria for unipolar depressive disorder by administering fully structured or semi-structured diagnostic interviews or applying cut-off values on self- or proxy-report screening scales</li> <li>depressive symptom severity by administering fully structured or semi-structured diagnostic interviews or applying self- or proxy-report screening scales</li> </ul> | <ul style="list-style-type: none"> <li>bipolar depression, no depression, or depression only as secondary outcome</li> <li>only cost-effectiveness, process evaluation, surrogate outcome measures or multifactorial outcome index scores</li> </ul>                                                                                                  |
| Study design | <ul style="list-style-type: none"> <li>randomised controlled trials</li> <li>cluster randomised controlled trials</li> </ul>                                                                                                                                                                                                                                                                                                                                                                        | <ul style="list-style-type: none"> <li>meta-analysis</li> <li>systematic reviews</li> <li>narrative reviews/ overview articles</li> <li>observational studies</li> <li>qualitative studies</li> <li>non-controlled trials</li> <li>non-randomised trials</li> <li>quasi-randomised trials</li> <li>cross-over randomised controlled trials</li> </ul> |

## S 2 Electronic search strategy for MEDLINE via PubMed.

| Component                                      | ID  | Search term                                                                         |
|------------------------------------------------|-----|-------------------------------------------------------------------------------------|
| Search filter for the "children" component [1] | #1  | child*[tiab]                                                                        |
|                                                | #2  | adolescent[tiab]                                                                    |
|                                                | #3  | infan*[tiab]                                                                        |
|                                                | #4  | #1 OR #2 OR #3                                                                      |
| MeSH terms for "prevention" component          | #5  | "Mental Health Services"[mesh:noexp] AND Prevention and Control[sh:noexp]           |
|                                                | #6  | "Preventive Health Services"[mesh:noexp] AND Prevention and Control[sh:noexp]       |
|                                                | #7  | "Child Health Services"[mesh:noexp] AND Prevention and Control[sh:noexp]            |
|                                                | #8  | "Adolescent Health Services"[mesh:noexp] AND Prevention and Control[sh:noexp]       |
|                                                | #9  | "Community Mental Health Services"[mesh:noexp] AND Prevention and Control[sh:noexp] |
|                                                | #10 | "Preventive Medicine"[mesh:noexp] AND Prevention and Control[sh:noexp]              |
|                                                | #11 | "Early Intervention (Education)"[mesh:noexp] AND Prevention and Control[sh:noexp]   |
|                                                | #12 | "Health Education"[mesh:noexp] AND Prevention and Control[sh:noexp]                 |
|                                                | #13 | "Health Promotion"[mesh:noexp] AND Prevention and Control[sh:noexp]                 |
|                                                | #14 | "Family Therapy"[mesh:noexp] AND Prevention and Control[sh:noexp]                   |
|                                                | #15 | "Psychotherapy, Group"[mesh:noexp] AND Prevention and Control[sh:noexp]             |
|                                                | #16 | "School Health Services"[mesh:noexp] AND Prevention and Control[sh:noexp]           |
|                                                | #17 | #5 OR #6 OR #7 OR #8 OR #9 OR #10 OR #11 OR #12 OR #13 OR #14 OR #15 OR #16         |



## S 2 Continued.

| Component                                          | ID                       | Search term                                                                                   |
|----------------------------------------------------|--------------------------|-----------------------------------------------------------------------------------------------|
| Keywords for "prevention" component                | #18                      | primary[tiab]                                                                                 |
|                                                    | #19                      | targeted[tiab]                                                                                |
|                                                    | #20                      | universal[tiab]                                                                               |
|                                                    | #21                      | selective[tiab]                                                                               |
|                                                    | #22                      | selected[tiab]                                                                                |
|                                                    | #23                      | indicated[tiab]                                                                               |
|                                                    | #24                      | psycho*[tiab]                                                                                 |
|                                                    | #25                      | educat*[tiab]                                                                                 |
|                                                    | #26                      | social[tiab]                                                                                  |
|                                                    | #27                      | #18 OR #19 OR #20 OR #21 OR #22 OR #23 OR #24 OR #25 OR #26                                   |
|                                                    | #28                      | prevent*[tiab]                                                                                |
|                                                    | #29                      | intervention*[tiab]                                                                           |
|                                                    | #30                      | program*[tiab]                                                                                |
| #31                                                | promot*[tiab]            |                                                                                               |
| #32                                                | #28 OR #29 OR #30 OR #31 |                                                                                               |
| #33                                                | #27 AND #32              |                                                                                               |
| Keywords and MeSH terms for "prevention" component | #34                      | #17 OR #33                                                                                    |
| MeSH terms for "depression" component              | #35                      | "Depression"[mesh:noexp] AND (Epidemiology[sh:noexp] OR Psychology[sh:noexp])                 |
|                                                    | #36                      | "Depressive Disorder"[mesh:noexp] AND (Epidemiology[sh:noexp] OR Psychology[sh:noexp])        |
|                                                    | #37                      | "Depressive Disorder, Major"[mesh:noexp] AND (Epidemiology[sh:noexp] OR Psychology[sh:noexp]) |
|                                                    | #38                      | "Dysthymic Disorder"[mesh:noexp] AND (Epidemiology[sh:noexp] OR Psychology[sh:noexp])         |
|                                                    | #39                      | "Depression, Postpartum"[mesh:noexp] AND (Epidemiology[sh:noexp] OR Psychology[sh:noexp])     |
|                                                    | #40                      | #35 OR #36 OR #37 OR #38 OR #39                                                               |
| Keyword for "depression" component                 | #41                      | depress*[tiab]                                                                                |
| MeSH terms and keywords for "depression" component | #42                      | #40 OR #41                                                                                    |

## S 2 Continued.

| Component                                                          | ID  | Search term                                                                                         |
|--------------------------------------------------------------------|-----|-----------------------------------------------------------------------------------------------------|
| MeSH terms for "study design" component                            | #43 | "Controlled Clinical Trials as Topic"[mesh:noexp] AND (Methods[sh:noexp] OR Epidemiology[sh:noexp]) |
|                                                                    | #44 | exp "Randomized Controlled Trial"[Publication Type]                                                 |
|                                                                    | #45 | #43 OR #44                                                                                          |
| Keywords for "study design" component                              | #46 | random*[tiab]                                                                                       |
|                                                                    | #47 | trial[tiab]                                                                                         |
|                                                                    | #48 | #46 OR #47                                                                                          |
| MeSH terms and keywords for "study design" component               | #49 | #45 OR #48                                                                                          |
| Exclude animal-related research                                    | #50 | exp "Animals"[mesh]                                                                                 |
|                                                                    | #51 | exp "Humans"[mesh]                                                                                  |
|                                                                    | #52 | #50 NOT #51                                                                                         |
|                                                                    | #53 | #49 NOT #52                                                                                         |
| Exclude reviews, meta-analyses and research protocols              | #54 | Review [Publication Type]                                                                           |
|                                                                    | #55 | "Review Literature as Topic"[mesh:noexp]                                                            |
|                                                                    | #56 | #54 OR #55                                                                                          |
|                                                                    | #57 | meta analysis[ti]                                                                                   |
|                                                                    | #58 | review[ti]                                                                                          |
|                                                                    | #59 | protocol[ti]                                                                                        |
|                                                                    | #60 | #57 OR #58 OR #59                                                                                   |
| Components: "child" + "prevention"                                 | #61 | #56 OR #60                                                                                          |
|                                                                    | #62 | #53 NOT #61                                                                                         |
| Components: "child" + "prevention" + "depression"                  | #63 | #4 AND #34                                                                                          |
| Components: "child" + "prevention" + "depression"                  | #64 | #63 AND #42                                                                                         |
| Components: "child" + "prevention" + "depression" + "study design" | #65 | #64 AND #62                                                                                         |
| Restrict to records published between 2003 and 2019                | #66 | #65 AND 2003:2019[dp]                                                                               |

## S3 Hand-searched journals and systematic reviews as additional sources of information

## Journals hand-searched for eligible primary studies

Journal of the American Academy of Child & Adolescent Psychiatry

Journal of Abnormal Child Psychology

Journal of Paediatric Psychology

Behaviour Research and Therapy

## Systematic reviews for which the reference lists were searched for eligible primary studies

Ahlen, J., Lenhard, F., & Ghaderi, A. (2015). Universal prevention for anxiety and depressive symptoms in children: a meta-analysis of randomized and cluster-randomized trials. *The journal of primary prevention*, 36(6), 387-403.

Barry, M. M., Clarke, A. M., Jenkins, R., & Patel, V. (2013). A systematic review of the effectiveness of mental health promotion interventions for young people in low- and middle-income countries. *BMC public health*, 13(1), 835.

Bastounis, A., Callaghan, P., Banerjee, A., & Michail, M. (2016). The effectiveness of the Penn Resiliency Programme (PRP) and its adapted versions in reducing depression and anxiety and improving explanatory style: A systematic review and meta-analysis. *Journal of adolescence*, 52, 37-48.

Brunwasser, S. M., & Garber, J. (2016). Programs for the prevention of youth depression: Evaluation of efficacy, effectiveness, and readiness for dissemination. *Journal of Clinical Child & Adolescent Psychology*, 45(6), 763-783.

Brunwasser, S. M., Gillham, J. E., & Kim, E. S. (2009). A meta-analytic review of the Penn Resiliency Program's effect on depressive symptoms. *Journal of consulting and clinical psychology*, 77(6), 1042-1054.

Calear, A. L., & Christensen, H. (2010). Review of internet-based prevention and treatment programs for anxiety and depression in children and adolescents. *Medical Journal of Australia*, 192(11), S12.

Calear, A. L., & Christensen, H. (2010). Systematic review of school-based prevention and early intervention programs for depression. *Journal of adolescence*, 33(3), 429-438.

Cary, C. E., & McMillen, J. C. (2012). The data behind the dissemination: A systematic review of trauma-focused cognitive behavioral therapy for use with children and youth. *Children and Youth Services Review*, 34(4), 748-757.

Christensen, H., Pallister, E., Smale, S., Hickie, I. B. & Calear, A. L. (2010). Community-based prevention programs for anxiety and depression in youth: A systematic review. *Journal of Primary Prevention*, 31, 139-170.

Corrieri, S., Heider, D., Conrad, I., Blume, A., König, H. H., & Riedel-Heller, S. G. (2013). School-based prevention programs for depression and anxiety in adolescence: A systematic review. *Health promotion international*, 29(3), 427-441.

Cuijpers, P., van Straten, A., Smit, F., Mihalopoulos, C., & Beekman, A. (2008). Preventing the onset of depressive disorders: a meta-analytic review of psychological interventions. *American Journal of Psychiatry*, 165(10), 1272-1280.

Dardas, L. A., van de Water, B., & Simmons, L. A. (2017). Parental involvement in adolescent depression interventions: A systematic review of randomized clinical trials. *International journal of mental health nursing*, 27(2), 555-570.

Dray, J., Bowman, J., Campbell, E., Freund, M., Wolfenden, L., Hodder, R. K., ... & Small, T. (2017). Systematic review of universal resilience-focused interventions targeting child and adolescent mental health in the school setting. *Journal of the American Academy of Child & Adolescent Psychiatry*, 56(10), 813-824.

Ebert, D. D., Zarski, A. C., Christensen, H., Stikkelbroek, Y., Cuijpers, P., Berking, M., & Riper, H. (2015). Internet and computer-based cognitive behavioral therapy for anxiety and depression in youth: a meta-analysis of randomized controlled outcome trials. *PLOS ONE*, 10(3), e0119895.

Erford, B. T., Erford, B. M., Lattanzi, G., Weller, J., Schein, H., Wolf, E., ... & Peacock, E. (2011). Counseling outcomes from 1990 to 2008 for school-age youth with depression: A meta-analysis. *Journal of Counseling & Development*, 89(4), 439-457.

## S3 Continued

## Systematic reviews for which the reference lists were searched for eligible primary studies

- Garber, J., Brunwasser, S. M., Zerr, A. A., Schwartz, K. T., Sova, K., & Weersing, V. R. (2016). Treatment and Prevention of Depression and Anxiety in Youth: Test of Cross-Over Effects. *Depression and anxiety, 33*(10), 939-959.
- Grist, R., Porter, J., & Stallard, P. (2017). Mental health mobile apps for preadolescents and adolescents: a systematic review. *Journal of medical internet research, 19*(5), e176.
- Grist, R., Croker, A., Denne, M., & Stallard, P. (2018). Technology Delivered Interventions for Depression and Anxiety in Children and Adolescents: A Systematic Review and Meta-analysis. *Clinical Child and Family Psychology Review, 22*(2), 147-171.
- Hetrick, S., Cox, G., & Merry, S. (2015). Where to go from here? An exploratory meta-analysis of the most promising approaches to depression prevention programs for children and adolescents. *International journal of environmental research and public health, 12*(5), 4758-4795.
- Hetrick, S. E., Cox, G. R., Witt, K. G., Bir, J. J., & Merry, S. N. (2016). Cognitive behavioural therapy (CBT), third-wave CBT and interpersonal therapy (IPT) based interventions for preventing depression in children and adolescents. *Cochrane Database of Systematic Reviews, 8*.
- Merry, S. N., Hetrick, S. E., Cox, G. R., Brudevold-Iversen, T., Bir, J. J., & McDowell, H. (2012). Psychological and educational interventions for preventing depression in children and adolescents. Evidence-Based Child Health: *A Cochrane Review Journal, 7*(5), 1409-1685.
- Merry, S. N. & Spence, S. H. (2007). Attempting to prevent depression in youth: A systematic review of the evidence. *Early Intervention in Psychiatry, 1*, 128-137.
- Neil, A. L., & Christensen, H. (2007). Australian school-based prevention and early intervention programs for anxiety and depression: a systematic review. *Medical Journal of Australia, 186*(6), 305.
- Richardson, T., Stallard, P., & Velleman, S. (2010). Computerised cognitive behavioural therapy for the prevention and treatment of depression and anxiety in children and adolescents: a systematic review. *Clinical child and family psychology review, 13*(3), 275-290.
- Stice, E., Shaw, H., Bohon, C., Marti, C. N., & Rohde, P. (2009). A meta-analytic review of depression prevention programs for children and adolescents: factors that predict magnitude of intervention effects. *Journal of consulting and clinical psychology, 77*(3), 486.
- Stockings, E. A., Degenhardt, L., Dobbins, T., Lee, Y. Y., Erskine, H. E., Whiteford, H. A., & Patton, G. (2016). Preventing depression and anxiety in young people: a review of the joint efficacy of universal, selective, and indicated prevention. *Psychological medicine, 46*(1), 11-26.
- Werner-Seidler, A., Perry, Y., Calcar, A. L., Newby, J. M., & Christensen, H. (2017). School-based depression and anxiety prevention programs for young people: A systematic review and meta-analysis. *Clinical psychology review, 51*, 30-47.

S4 Interrater-reliability (Cohen's Kappa) and adequate reporting (proportion of trial abstracts) in 169 abstracts assessed according to CONSORT-A and CONSORT-C checklist items.

| Item              | Extension for cluster trials * | Description                                                                                       | Cohen's kappa |               |                 | Proportion of trial abstract that reported... |              |            |
|-------------------|--------------------------------|---------------------------------------------------------------------------------------------------|---------------|---------------|-----------------|-----------------------------------------------|--------------|------------|
|                   |                                |                                                                                                   | unweighted    | equal weights | squared weights | adequately                                    | inadequately | not at all |
| General items     |                                |                                                                                                   |               |               |                 |                                               |              |            |
| 01 Title          | No                             | a) Identification of the study as randomized                                                      | .96           | .96           | .96             | 58.0                                          | -            | 42.0       |
|                   | Yes                            | b) Identification of study as cluster randomized                                                  | 1             |               | 1               | 31.8                                          | -            | 68.2       |
| 02 Trial design   | No                             | Description of the trial design (e.g. parallel, cluster, non-inferiority)                         | .38           | .45           | .53             | 30.2                                          | 66.3         | 3.6        |
| Trial Methodology |                                |                                                                                                   |               |               |                 |                                               |              |            |
| 03 Participants   | No                             | a) Eligibility criteria for participants <u>and</u> the settings where the data were collected ** |               |               |                 | 35.5                                          | 62.1         | 2.4        |
|                   |                                | (i) The authors report eligibility criteria for participants                                      | .77           | .78           | .80             | 80.5                                          | 17.2         | 2.4        |
|                   |                                | (ii) The authors report eligibility criteria for setting                                          | .81           | .85           | .89             | 35.5                                          | 30.2         | 34.3       |
|                   | Yes                            | b) Eligibility criteria for clusters                                                              | .80           |               | .79             | 47.0                                          | 30.3         | 22.7       |
| 04 Interventions  | No                             | Interventions intended for each group **                                                          |               |               |                 | 30.8                                          | 68.0         | 1.2        |
|                   |                                | (i) Authors report essential features of the experimental intervention                            | .80           | .81           | .82             | 52.7                                          | 45.6         | 1.8        |
|                   |                                | (ii) Authors report essential features of the comparison intervention                             | .76           | .82           | .86             | 47.9                                          | 21.3         | 30.8       |
| 05 Objective      | No                             | (a) Specific objective <u>or</u> hypothesis                                                       | .73           | .74           | .76             | 89.9                                          | 8.3          | 1.8        |

|                       |     |                                                                                                                            |     |     |     |      |      |      |
|-----------------------|-----|----------------------------------------------------------------------------------------------------------------------------|-----|-----|-----|------|------|------|
|                       | Yes | (b) Whether objective <u>or</u> hypothesis pertains to the cluster level, the individual participant level, <u>or</u> both | .66 |     | .89 | 1.5  | -    | 98.5 |
| 06 Outcome            | No  | (a) Clearly defined primary outcome for this report **                                                                     |     |     |     | 10.1 | 89.9 | -    |
|                       |     | (i) Authors explicitly state the primary outcome                                                                           | .91 | .91 | .91 | 14.8 | 84.6 | 0.6  |
|                       |     | (ii) Authors explicitly state when the primary outcome was assessed                                                        | .69 | .78 | .84 | 51.5 | 23.1 | 25.4 |
|                       | Yes | (b) Whether the primary outcome pertains to the cluster level, the individual participant level <u>or</u> both             | .56 |     | .61 | 3.0  | 3.0  | 93.9 |
| 07 Randomization      | No  | (a) How participants were allocated to interventions                                                                       | .49 | .59 | .66 | 2.4  | -    | 97.6 |
|                       | Yes | (b) How clusters were allocated to interventions                                                                           | .88 |     | .88 | 6.1  | -    | 93.9 |
| 08 Blinding (masking) | No  | Whether or not participants, care givers, <u>and</u> those assessing the outcomes were blinded to group assignment **      |     |     |     | -    | 3.6  | 96.4 |
|                       |     | (i) Authors describe if participants were blinded                                                                          | .77 | .85 | .92 | 1.2  | 1.8  | 97.0 |
|                       |     | (ii) Authors describe if program deliverer were blinded                                                                    | .77 | .85 | .92 | 1.2  | 1.8  | 97.0 |
|                       |     | (iii) Authors describe if data collectors/analysts were blinded                                                            | .66 | .66 | .66 | 0.6  | 1.8  | 97.6 |
| <b>Trial results</b>  |     |                                                                                                                            |     |     |     |      |      |      |
| 09 Numbers randomized | No  | (a) Number of participants randomized to each group                                                                        | .95 | .97 | .98 | 32.0 | 1.8  | 66.3 |
|                       | Yes | (b) Number of clusters randomized to each group                                                                            | .76 |     | .78 | 13.6 | 1.5  | 84.8 |

|                       |     |                                                                                                      |      |      |      |      |      |      |
|-----------------------|-----|------------------------------------------------------------------------------------------------------|------|------|------|------|------|------|
| 10 Numbers analyzed   | No  | (a) Number of participants analyzed in each group                                                    | .88  | .93  | .96  | 3.6  | 2.4  | 94.1 |
|                       | Yes | (b) Number of clusters analyzed in each group                                                        | 1    |      | 1    | 1.5  | -    | 98.5 |
| 11 Outcome            | No  | (a) For the primary outcome, a result for each group and the estimated effect size and its precision | .94  | .94  | .94  | 27.2 | 72.8 | -    |
|                       | Yes | (b) Results at the cluster <u>or</u> individual level as applicable for each primary outcome         | .96  |      | .96  | 28.8 | 71.2 | -    |
| 12 Harms              | No  | Important adverse events <u>or</u> side effects                                                      | 0*** | 0*** | 0*** | 0.6  | -    | 99.4 |
| 13 Conclusions        | No  | General interpretation of the results **                                                             |      |      |      | 36.7 | 47.3 | 16.0 |
|                       |     | (i) Authors state the conclusions of the trial                                                       | .75  | .79  | .82  | 71.0 | 1.8  | 27.2 |
|                       |     | (ii) Authors state implications for further research or clinical practice                            | .74  | .78  | .81  | 46.2 | 8.3  | 45.6 |
| 14 Trial registration | No  | Registration number <u>and</u> name of trial register **                                             |      |      |      | 17.2 | 3.0  | 79.9 |
|                       |     | (i) Authors provide details on the trial registration number                                         | 1    | 1    | 1    | 20.1 | -    | 79.9 |
|                       |     | (ii) Authors provide details on the name of the trial register                                       | .98  | .98  | .98  | 17.2 | 0.6  | 82.2 |
| 15 Funding            | No  | Source of funding                                                                                    | .88  | .89  | .95  | 11.8 | 0.6  | 87.6 |

Comments: Items corresponding to author contact information and trial status were not assessed because these items are specific to conference abstracts that were excluded from this study. Because journals often have their own standards for positioning funding information, we rated funding as adequately reported if it was reported in the abstract or in a section other than the abstract (e.g., at the end of the article). Due to rounding errors, the percentages may not add up.

1  
2  
3 \* Studies that randomized their intervention on the cluster level were assessed for adherence to CONSORT-A and CONSORT-C (N = 66). Studies that randomized on  
4 the individual level were evaluated for adherence to CONSORT-A, only (N = 103). As a result, all 169 reports were assessed for CONSORT-A, but only 66 cluster  
5 randomized trial reports were additionally checked for CONSORT-C.  
6  
7

8 \*\* For those items where multiple dimensions are required, we operationalized each dimension separately. Subsequently we merged these dimensions into summary  
9 variables. If all dimensions were reported adequately, the summary variable was reported adequately. If at least one dimension was reported inadequately, the summary  
10 variable was reported inadequately. If all dimensions were not reported, the summary variable was not reported.  
11  
12

13 \*\*\* The agreement of the CONSORT items Harms was almost identical. Kappa is nevertheless equal to zero. The correction factor of the kappa formula is responsible  
14 for this paradox. The factor corrects for random agreement between raters. If the proportion of observed agreement is high, it can lower the kappa values toward zero.  
15 For further explanation and examples, see Feinstein and Cicchetti. [2]  
16  
17  
18  
19  
20  
21  
22  
23  
24  
25  
26  
27  
28  
29  
30  
31  
32  
33  
34  
35  
36  
37  
38  
39  
40  
41  
42  
43  
44  
45  
46



## S5 Additional variables extracted during the data collection process.

| Variable                  | Definition                                                                                                                                                                                               | Source                                            |
|---------------------------|----------------------------------------------------------------------------------------------------------------------------------------------------------------------------------------------------------|---------------------------------------------------|
| Number of authors         | The number of authors who have published the trial report.                                                                                                                                               | First page of the trial report                    |
| Sample size               | The number of subjects in all study arms.                                                                                                                                                                | Methods of the manuscript                         |
| Number of sampling points | The number of sampling points in all study arms.                                                                                                                                                         | Methods of the manuscript                         |
| Abstract word count       | The number of words used only for the abstract, excluding keywords, author information and such.                                                                                                         | Abstract of the trial report                      |
| Journal impact factor     | The journal impact factor calculated from data indexed in the Web of Science Core Collection. If data was missing for a certain year, the journal impact factor from the latest year available was used. | Journal Citation Reports as provided by Clarivate |
| Abstract format           | The number of sections used to structure the abstract. Following Hua et al., abstracts were categorized as unstructured (1 section), structured (2-4 sections) or highly structured (>4 sections).[3]    | Abstract of the trial report                      |
| Year of publication       | The year in which the trial report was first published.                                                                                                                                                  | First page of the trial report                    |

S6 Boxplots visualizing the distribution of continuous variables possibly related to overall reporting quality.

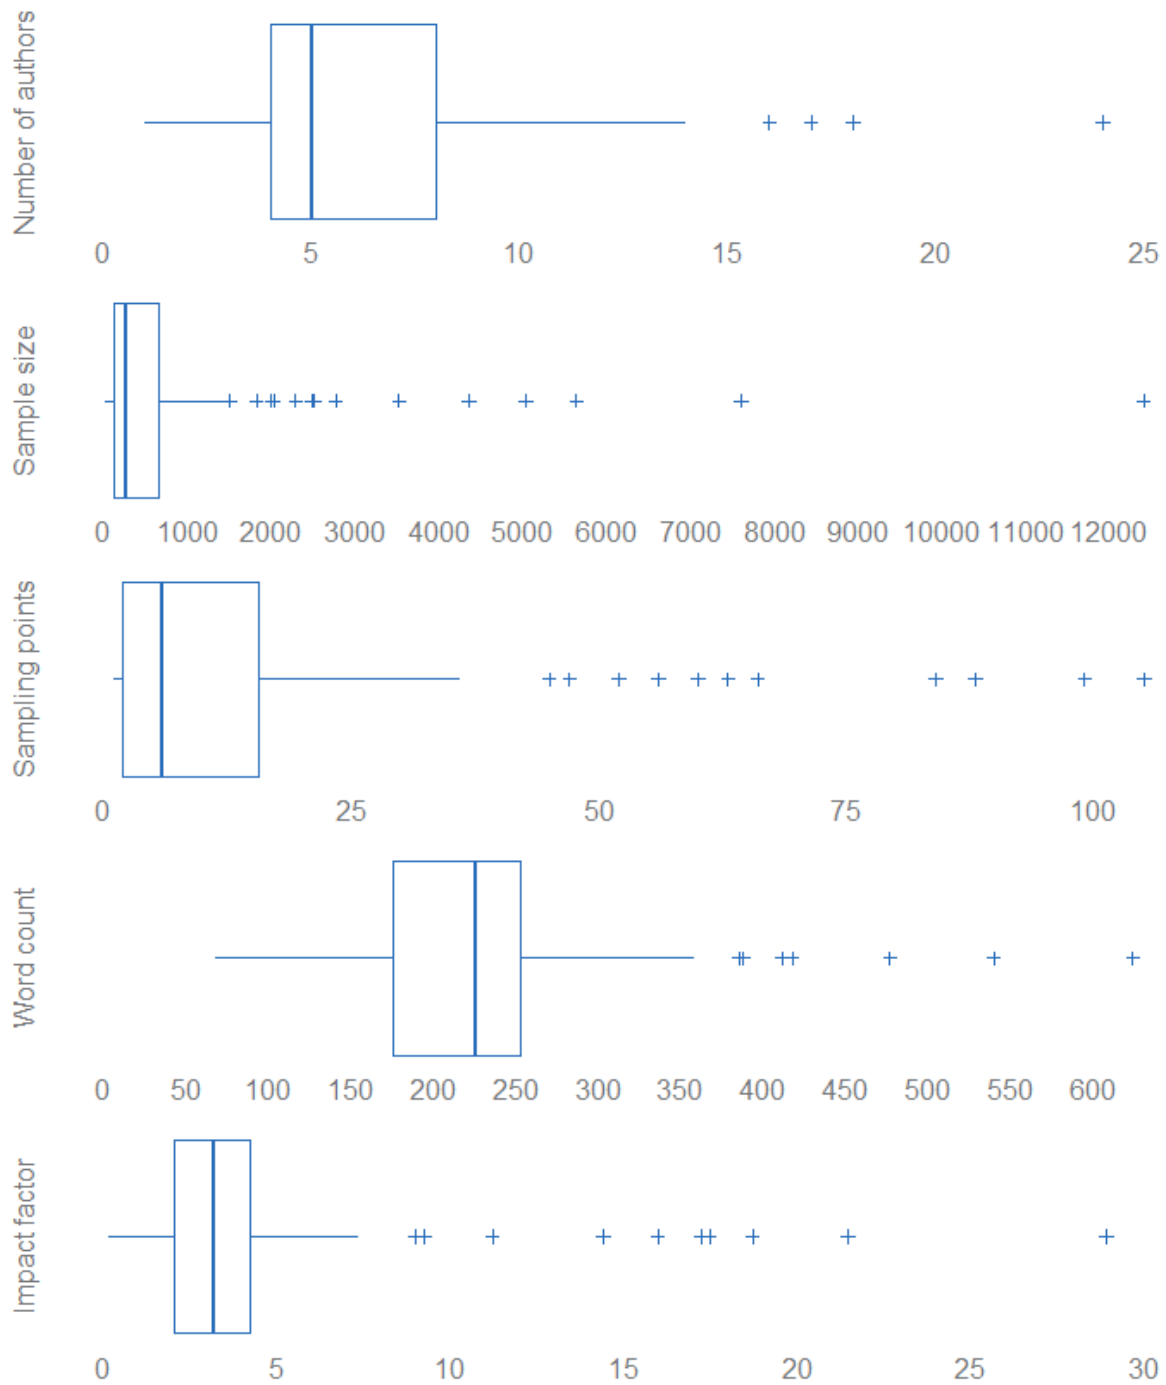

S7 Annual number of included trial reports by study design between January 2003 and August 2020 (N= 169).

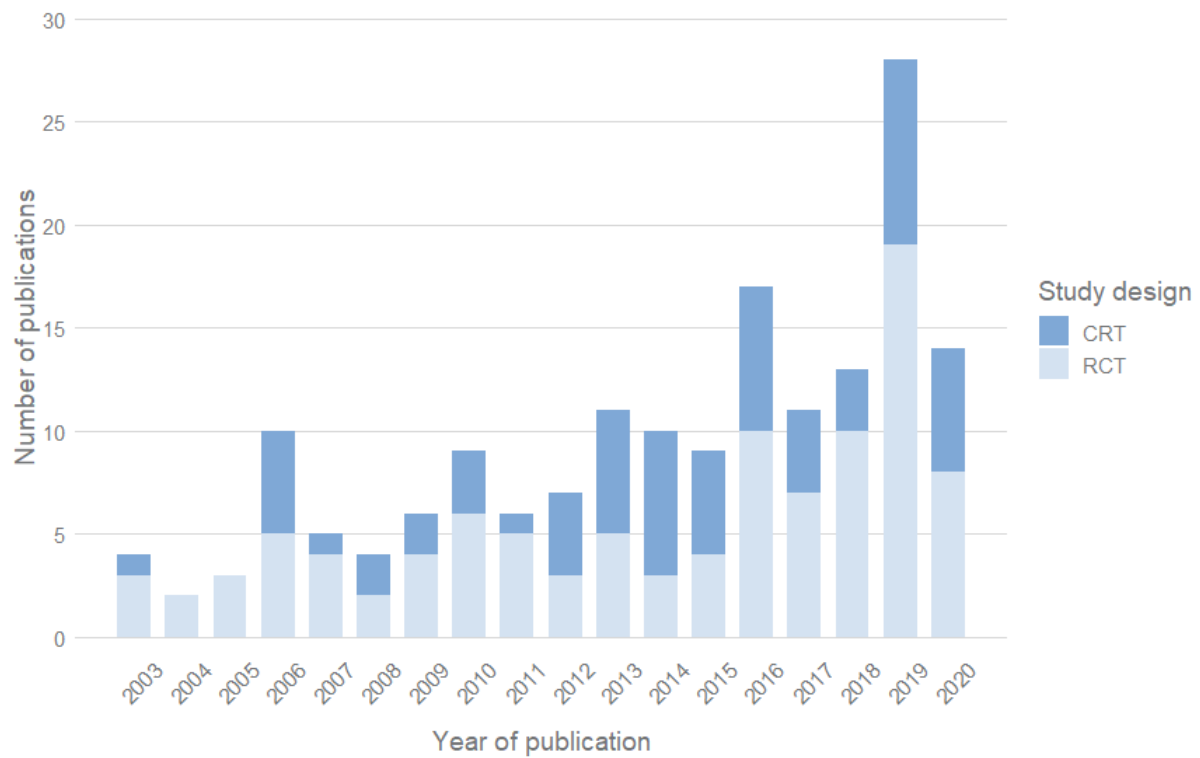

## REFERENCES

- 1 Kastner M, Wilczynski NL, Walker-Dilks C, et al. Age-specific search strategies for Medline. *J Med Internet Res* 2006;8(4):e25. doi:10.2196/jmir.8.4.e25 [published Online First: 25 October 2006].
- 2 Feinstein AR, Cicchetti DV. High agreement but low Kappa: I. the problems of two paradoxes. *J Clin Epidemiol* 1990;43(6):543–49.  
<http://www.sciencedirect.com/science/article/pii/089543569090158L>.
- 3 Hua F, Walsh T, Glenny A-M, et al. Structure formats of randomised controlled trial abstracts: a cross-sectional analysis of their current usage and association with methodology reporting. *BMC Med Res Methodol* 2018;18(1):6. doi:10.1186/s12874-017-0469-3 [published Online First: 10 January 2018].

**Proposed items to be used for reporting methodology research, adapted from the PRISMA Checklist (Murad & Wang, 2017)**

| Section and Topic    | Checklist item                                                                                                                                                                                                                         | Location where item is reported                                                             |
|----------------------|----------------------------------------------------------------------------------------------------------------------------------------------------------------------------------------------------------------------------------------|---------------------------------------------------------------------------------------------|
| <b>TITLE</b>         |                                                                                                                                                                                                                                        |                                                                                             |
| Title                | Identify the report as a meta-epidemiologic study                                                                                                                                                                                      | p. 1, l. 2                                                                                  |
| <b>ABSTRACT</b>      |                                                                                                                                                                                                                                        |                                                                                             |
| Structured summary   | Provide a structured summary that includes the background of the topic, goal of the study, data sources, method of data selection, appraisal and synthesis methods, results, limitations, conclusions and implications of key findings | p. 2, l. 11 -p. 3, l. 36                                                                    |
| <b>INTRODUCTION</b>  |                                                                                                                                                                                                                                        |                                                                                             |
| Rationale            | Describe the rationale for the meta-epidemiological study in the context of what is already known                                                                                                                                      | p. 4, l. 53 - 75                                                                            |
| Objective            | Provide an explicit statement of the goal of the meta-epidemiological study and the hypothesis being empirically tested                                                                                                                | p. 4, l. 75 - p. 5, l. 78                                                                   |
| <b>METHODS</b>       |                                                                                                                                                                                                                                        |                                                                                             |
| Protocol             | Indicate if a protocol exists, if and where it can be accessed (eg, Web address).<br>Registration of a protocol is not mandatory                                                                                                       | p. 16, l. 358 -<br>p. 17, l. 361                                                            |
| Eligibility criteria | Specify study characteristics used as criteria for eligibility with a rationale                                                                                                                                                        | p. 5, l. 81-88                                                                              |
| Information sources  | Describe all information sources (eg, databases with dates of coverage, contact with experts to identify additional studies, Internet searches) and search date                                                                        | p. 5, l. 90-98                                                                              |
| Search               | Present full electronic search strategy for at least one database, including any limits used, such that it could be repeated. Search is commonly not driven by a clinical question                                                     | Supplementary S2<br>(Tables longer than 2 pages are published as online only supplementary) |

|    |                                    |                                                |                  |
|----|------------------------------------|------------------------------------------------|------------------|
| 1  |                                    |                                                |                  |
| 2  |                                    |                                                |                  |
| 3  | Study selection                    | Describe the process for selecting studies     | p. 6, l. 100-109 |
| 4  |                                    | for inclusion (ie, how many reviewers          |                  |
| 5  |                                    | selected studies, reviewing in duplicate or    |                  |
| 6  |                                    | by single individuals)                         |                  |
| 7  |                                    |                                                |                  |
| 8  |                                    |                                                |                  |
| 9  | Data collection process            | Describe method of data extraction from        | p. 6, l. 111-116 |
| 10 |                                    | reports (eg, piloted forms, independently, in  |                  |
| 11 |                                    | duplicate) and any processes used for          |                  |
| 12 |                                    | manipulating data or obtaining and             |                  |
| 13 |                                    | confirming data from investigators             |                  |
| 14 |                                    |                                                |                  |
| 15 |                                    |                                                |                  |
| 16 |                                    |                                                |                  |
| 17 | Data items                         | List and define all variables for which data   | Supplementary S4 |
| 18 |                                    | were sought and any assumptions and            | and S 5          |
| 19 |                                    | imputations made                               |                  |
| 20 |                                    |                                                |                  |
| 21 |                                    |                                                |                  |
| 22 | Risk of bias in individual studies | If risk of bias assessment of individual       | Not relevant     |
| 23 |                                    | studies was relevant to the analysis,          |                  |
| 24 |                                    | describe the items used and how this           |                  |
| 25 |                                    | information is to be used during data          |                  |
| 26 |                                    | synthesis                                      |                  |
| 27 |                                    |                                                |                  |
| 28 |                                    |                                                |                  |
| 29 |                                    |                                                |                  |
| 30 | Summary measures                   | State the principal summary measures (eg,      | p. 7, l. 126-135 |
| 31 |                                    | ratio of risk ratios, difference in means) and |                  |
| 32 |                                    | explain its meaning and direction to readers   |                  |
| 33 |                                    |                                                |                  |
| 34 | Synthesis of results               | Describe the statistical or descriptive        | Not relevant     |
| 35 |                                    | methods of synthesis including measures        |                  |
| 36 |                                    | of consistency if relevant. If applicable,     |                  |
| 37 |                                    | describe the development of statistical or     |                  |
| 38 |                                    | simulation modelling based on theoretical      |                  |
| 39 |                                    | background. Describe and justify               |                  |
| 40 |                                    | assumptions and computational                  |                  |
| 41 |                                    | approximations. Describe methods of            |                  |
| 42 |                                    | additional analyses (eg, sensitivity or        |                  |
| 43 |                                    | subgroup analyses, meta-regression), if        |                  |
| 44 |                                    | done, indicating which were prespecified       |                  |
| 45 |                                    |                                                |                  |
| 46 |                                    |                                                |                  |
| 47 |                                    |                                                |                  |
| 48 |                                    |                                                |                  |
| 49 |                                    |                                                |                  |
| 50 |                                    |                                                |                  |
| 51 |                                    |                                                |                  |

## RESULTS

|    |                 |                                             |                  |
|----|-----------------|---------------------------------------------|------------------|
| 52 |                 |                                             |                  |
| 53 |                 |                                             |                  |
| 54 | Study selection | Give numbers of studies assessed for        | p. 6, l. 100-106 |
| 55 |                 | eligibility and included in the study, with |                  |
| 56 |                 | reasons for exclusions at each stage,       |                  |
| 57 |                 | ideally with a flow diagram. Present a      |                  |
| 58 |                 |                                             |                  |
| 59 |                 |                                             |                  |
| 60 |                 |                                             |                  |

|                               |                                                                                                                                                                                                                     |                                                           |                                                                                                                                       |
|-------------------------------|---------------------------------------------------------------------------------------------------------------------------------------------------------------------------------------------------------------------|-----------------------------------------------------------|---------------------------------------------------------------------------------------------------------------------------------------|
|                               |                                                                                                                                                                                                                     | measure of inter-reviewer agreement (eg, kappa statistic) |                                                                                                                                       |
| Study characteristics         | For each study, present characteristics for which data were extracted and provide the citations. Clinical characteristics may not always be relevant                                                                |                                                           | p. 8, l. 146 - 154                                                                                                                    |
| Risk of bias within studies   | If risk of bias assessment of individual studies was used in the meta-epidemiological analysis, report risk of bias indicators of each study to allow replication of findings                                       |                                                           | Not relevant                                                                                                                          |
| Results of individual studies | Present data elements used in the meta-epidemiological analysis from each study (results of clinical outcomes may not be relevant)                                                                                  |                                                           | Data of individual studies can be retrieved from an online repository ( <a href="https://bit.ly/3tl7kvz">https://bit.ly/3tl7kvz</a> ) |
| Synthesis of results          | Present results of statistical analysis done, including measures of precision and measures of consistency. Present validity of assumptions and fit of statistical or simulation modelling, if applicable            |                                                           | p. 8, l.156 –<br>p. 9, l. 177                                                                                                         |
| Additional analysis           | Give results of additional analyses, if done (eg, sensitivity or subgroup analyses, metaregression)                                                                                                                 |                                                           | Not relevant                                                                                                                          |
| <b>DISCUSSION</b>             |                                                                                                                                                                                                                     |                                                           |                                                                                                                                       |
| Summary of evidence           | Summarise the main findings and compare them with existing knowledge about the topic. The quality of evidence may not be relevant; however, investigators should describe their certainty in the results to readers |                                                           | p. 9, l. 179 –<br>p. 14, l. 298                                                                                                       |
| Limitations                   | Discuss limitations at research methodology level (eg, likelihood of reporting or publication bias)                                                                                                                 |                                                           | p. 14, l. 308 –<br>p. 15, l. 326                                                                                                      |
| Conclusions                   | Provide general interpretation of the results and implications for future research.                                                                                                                                 |                                                           | p. 15, l. 327 -<br>p. 16, l. 348                                                                                                      |

1  
2  
3 Provide any plausible impact on clinical  
4 practice  
5

## 6 FUNDING

7  
8 Funding

9 Describe sources of funding for the  
10 methodology research and role of funders

11 p. 16, l. 350-351  
12  
13  
14  
15  
16  
17  
18  
19  
20  
21  
22  
23  
24  
25  
26  
27  
28  
29  
30  
31  
32  
33  
34  
35  
36  
37  
38  
39  
40  
41  
42  
43  
44  
45  
46  
47  
48  
49  
50  
51  
52  
53  
54  
55  
56  
57  
58  
59  
60

For peer review only



# BMJ Open

## Reporting quality for abstracts of randomised trials on child and adolescent depression prevention: A meta-epidemiological study on adherence to CONSORT for abstracts

|                                 |                                                                                                                                                                                                                                                                                                         |
|---------------------------------|---------------------------------------------------------------------------------------------------------------------------------------------------------------------------------------------------------------------------------------------------------------------------------------------------------|
| Journal:                        | <i>BMJ Open</i>                                                                                                                                                                                                                                                                                         |
| Manuscript ID                   | bmjopen-2022-061873.R1                                                                                                                                                                                                                                                                                  |
| Article Type:                   | Original research                                                                                                                                                                                                                                                                                       |
| Date Submitted by the Author:   | 01-Jun-2022                                                                                                                                                                                                                                                                                             |
| Complete List of Authors:       | Wiehn, Jascha; Charité Universitätsmedizin Berlin, Institute of Public Health<br>Nonte, Johanna; Universität Bielefeld, Department of Population Medicine and Health Services Research, Bielefeld School of Public Health<br>Prugger, C; Charite Universitatsmedizin Berlin, Institute of Public Health |
| <b>Primary Subject Heading</b>: | Mental health                                                                                                                                                                                                                                                                                           |
| Secondary Subject Heading:      | Paediatrics, Mental health, Research methods                                                                                                                                                                                                                                                            |
| Keywords:                       | STATISTICS & RESEARCH METHODS, MENTAL HEALTH, PAEDIATRICS, Child & adolescent psychiatry < PSYCHIATRY, Depression & mood disorders < PSYCHIATRY                                                                                                                                                         |
|                                 |                                                                                                                                                                                                                                                                                                         |

SCHOLARONE™  
Manuscripts



I, the Submitting Author has the right to grant and does grant on behalf of all authors of the Work (as defined in the below author licence), an exclusive licence and/or a non-exclusive licence for contributions from authors who are: i) UK Crown employees; ii) where BMJ has agreed a CC-BY licence shall apply, and/or iii) in accordance with the terms applicable for US Federal Government officers or employees acting as part of their official duties; on a worldwide, perpetual, irrevocable, royalty-free basis to BMJ Publishing Group Ltd ("BMJ") its licensees and where the relevant Journal is co-owned by BMJ to the co-owners of the Journal, to publish the Work in this journal and any other BMJ products and to exploit all rights, as set out in our [licence](#).

The Submitting Author accepts and understands that any supply made under these terms is made by BMJ to the Submitting Author unless you are acting as an employee on behalf of your employer or a postgraduate student of an affiliated institution which is paying any applicable article publishing charge ("APC") for Open Access articles. Where the Submitting Author wishes to make the Work available on an Open Access basis (and intends to pay the relevant APC), the terms of reuse of such Open Access shall be governed by a Creative Commons licence – details of these licences and which [Creative Commons](#) licence will apply to this Work are set out in our licence referred to above.

Other than as permitted in any relevant BMJ Author's Self Archiving Policies, I confirm this Work has not been accepted for publication elsewhere, is not being considered for publication elsewhere and does not duplicate material already published. I confirm all authors consent to publication of this Work and authorise the granting of this licence.

1  
2  
3  
4  
5  
6  
7  
8  
9  
10  
11  
12  
13  
14  
15  
16  
17  
18  
19  
20  
21  
22  
23  
24  
25  
26  
27  
28  
29  
30  
31  
32  
33  
34  
35  
36  
37  
38  
39  
40  
41  
42  
43  
44  
45  
46  
47  
48  
49  
50  
51  
52  
53  
54  
55  
56  
57  
58  
59  
60

1 Title of the article: Reporting quality for abstracts of randomised trials on child and adolescent  
2 depression prevention: A meta-epidemiological study on adherence to CONSORT for abstracts

3 Corresponding author: Jascha Wiehn; [jascha.wiehn@charite.de](mailto:jascha.wiehn@charite.de), Charitéplatz 1, 10117 Berlin

4 First author: Jascha Wiehn, Institute of Public Health, Charité – Universitätsmedizin Berlin, Berlin,  
5 Germany

6 Second author: Johanna Nonte, Department of Population Medicine and Health Services  
7 Research, Bielefeld School of Public Health, Bielefeld University, Bielefeld, Germany

8 Third author: Christof Prugger, Institute of Public Health, Charité – Universitätsmedizin Berlin,  
9 Berlin, Germany

10 Word count: 3,850

11

## 12 **ABSTRACT**

### 13 **Objectives**

14 This study aimed to investigate adherence to CONSORT for abstracts in reports of randomised  
15 trials on child and adolescent depression prevention. Secondary objective was to examine factors  
16 associated with overall reporting quality.

### 18 **Design**

19 Meta-epidemiological study.

### 21 **Data Sources**

22 We searched MEDLINE, EMBASE, PsychINFO, PsycArticles, and CENTRAL.

### 24 **Eligibility Criteria**

25 Trials were eligible if the sample consisted of children and adolescents under 18 years with or  
26 without an increased risk for depression or subthreshold depression. We included reports  
27 published from January 1, 2003 to August 8, 2020 on RCTs and CRTs assessing universal,  
28 selective, and indicated interventions aiming to prevent the onset of depression or reducing  
29 depressive symptoms.

### 31 **Data extraction and synthesis**

32 As the primary outcome measure, we assessed for each trial abstract whether information  
33 recommended by CONSORT was adequately reported, inadequately reported, or not reported.

1  
2  
3 34 Moreover, we calculated a summative score of overall reporting quality and analysed associations  
4  
5 35 with trial and journal characteristics.  
6  
7

8 36  
9  
10 37 **Results**  
11  
12  
13 38 We identified 169 eligible studies, 103 (61%) RCTs and 66 (39%) CRTs. Adequate reporting  
14  
15 39 varied considerably across CONSORT items: while 9 out of 10 abstracts adequately reported the  
16  
17 40 study objective, no abstract adequately provided information on blinding. Important adverse  
18  
19 41 events or side effects were only adequately reported in one out of 169 abstracts. Summative  
20  
21 42 scores for the abstracts' overall reporting quality ranged from 17% to 83%, with a median of 40%.  
22  
23 43 Scores were associated with the number of authors, abstract word count, journal impact factor,  
24  
25 44 year of publication and abstract structure.  
26  
27  
28  
29 45

30  
31 46 **Conclusions**  
32  
33  
34 47 Reporting quality for abstracts of trials on child and adolescent depression prevention is  
35  
36 48 suboptimal. To help health professionals make informed judgments, efforts for improving  
37  
38 49 adherence to reporting guidelines for abstracts are needed.  
39  
40

#### 41 50 42 43 44 51 **Strengths and limitations of this study**

- 45  
46  
47 52 • This study is the first to systematically assess the reporting quality for abstracts of  
48  
49 53 randomized trials on paediatric depression prevention.  
50  
51 54 • Our extensive, reproducible search strategy identified 169 eligible journal articles reflecting  
52  
53 55 the available evidence from such trials published 2003 to 2020.  
54  
55  
56  
57  
58  
59

- 1  
2  
3 56 • Two reviewers independently screened abstracts and extracted data using standardised  
4  
5 57 methods, but the reviewers were not blinded to meta-data such as study authors, journal  
6  
7 58 name or year of publication.  
8  
9 59 • Since no method has so far been established for determining overall reporting quality of  
10  
11 60 abstracts, we approximated overall reporting quality by calculating a summative score  
12  
13 61 based on CONSORT items.  
14  
15 62 • Because we applied a topic-based approach without restricting the information source to  
16  
17 63 specific journals, our study findings offer insights into general reporting quality in trials on  
18  
19 64 childhood depression prevention.  
20  
21  
22  
23  
24  
25  
26  
27  
28  
29  
30  
31  
32  
33  
34  
35  
36  
37  
38  
39  
40  
41  
42  
43  
44  
45  
46  
47  
48  
49  
50  
51  
52  
53  
54  
55  
56  
57  
58  
59  
60

## 1 INTRODUCTION

Reports of trials should provide all necessary information allowing readers to evaluate the reproducibility, validity and utility of studies and findings. [1, 2] Poor reporting of health research leads, at the very least, to avoidable waste of resources [3] and can ultimately jeopardize patient care. [4] The same applies to abstracts of trials. Due to time, access and language constraints, health professionals often use abstracts as the primary source of information to learn about a trial, [5, 6] and the way abstracts report study details can influence their decisions in patient management. [7] Researchers conducting systematic reviews and meta-analyses may incorrectly exclude eligible studies in title and abstract screening due to poor reporting which can distort evidence synthesis. [8] Moreover, indexers of literature databases rely on adequate title and abstract reporting to correctly determine search terms such as medical subject headings, otherwise relevant journal articles cannot be found, read and quoted to affect medical practice.

For these reasons, authors of randomized trial reports are encouraged to follow the Consolidated Standards of Reporting Trials (CONSORT) guidelines [5–8] and its extension for abstracts (CONSORT-A). [9, 10] CONSORT-A was published in 2008 to provide guidance to authors on information to be reported in abstracts of randomized controlled trials (RCTs). In 2012, the guidelines were further complemented by a module for cluster randomized trial (CRT) abstracts (CONSORT-C). [11] Although some improvement in reporting quality of trials has been observed over recent years, [12] general adherence to CONSORT guidelines remains suboptimal in articles published both in general medicine [13–17] and psychiatry/psychology journals. [18–20] Similar results have been reported from studies on adherence to CONSORT-A for abstract reporting in various health disciplines including one previous study on abstracts of psychiatric RCTs.[21] However, no prior study has investigated the abstract reporting quality of depression prevention trials in young people. We therefore aimed to evaluate to what extent CONSORT-A and CONSORT-C criteria are met by abstracts of reports on child and adolescent depression

1  
2  
3 90 prevention trials. Secondary objective of our study was to explore trial and journal characteristics  
4  
5 91 associated with the abstracts' overall reporting quality.  
6  
7

8 92  
9

## 10 93 **2 METHODS**

### 11 94 **2.1 Eligibility criteria**

12  
13  
14  
15 95 We included reports on RCTs and CRTs assessing universal, selective and indicated interventions  
16  
17 96 aiming to prevent the onset of depression or reducing depressive symptoms in children and  
18  
19 97 adolescents under 18 years with or without an increased risk for depression or subthreshold  
20  
21 98 depression. A detailed list of the eligibility criteria is provided in Supplementary S1. We only  
22  
23 99 included research articles published in peer-reviewed journals, the primary source of information  
24  
25 100 for paediatric health specialists,[22] and we considered the period between January 1, 2003 and  
26  
27 101 August 5, 2020 to assess reporting quality before and after the publication of CONSORT-A and -  
28  
29 102 C guidelines.  
30  
31  
32

### 33 103 **2.2 Information sources**

34  
35 104 We searched the electronic literature databases MEDLINE (via PubMed and Ovid®), EMBASE  
36  
37 105 (via Ovid®), PsychINFO (via EBSCOhost®), PsycArticles (via EBSCOhost®), and CENTRAL (via  
38  
39 106 Cochrane Library) on March 9, 2019 and updated the search on August 8, 2020. Search strings  
40  
41 107 were developed in collaboration with a trained librarian. The electronic search strategy for  
42  
43 108 MEDLINE via PubMed is shown in Supplementary S2. Electronic search strategies for the other  
44  
45 109 databases are provided in an online repository. [23] Additional articles were retrieved by hand-  
46  
47 110 searching four specialty journals and the reference lists of systematic reviews (Supplementary  
48  
49 111 S3).  
50  
51  
52  
53  
54  
55  
56  
57  
58  
59  
60



## 2.3 Study selection and data collection

The study selection process consisted of a title and abstract screening, a full text screening and a discussion and consensus phase (Figure 1). Two independent reviewers extracted information from articles into piloted spreadsheets with drop-down menus. The reviewers first determined whether randomization was performed on an individual (RCT) or cluster level (CRT) and subsequently assessed all abstracts according to CONSORT-A and CRTs additionally according to CONSORT-C. [10, 11] For each item, the reviewers judged whether the abstract reported information adequately, inadequately or not at all.

For items with multiple dimensions, we operationalized each dimension separately and then created item variables for analysis based on the extracted information. For example, CONSORT-A item *03 Participants* requires reporting the eligibility criteria for participants and settings where the data were collected. Thus, if both dimensions were reported adequately (or not at all), then the item was judged as adequately reported (or as not reported). However, if either the eligibility criteria for participants or for settings was reported inadequately, the item was judged as inadequately reported.

Based on previous studies, we pre-specified seven study characteristics previously associated with overall reporting quality (Supplementary S4). We operationalized these study characteristics using the variable definitions in Supplementary S5.

## 2.4 Statistical analysis

We used descriptive statistics to summarize the extent to which RCT and CRT abstracts adhered to the 15 CONSORT-A items and CRT abstracts adhered to the additional eight CONSORT-C items. For each CONSORT item we thus present the proportion of trial abstracts adequately, inadequately, or not reporting the item information as required by the appropriate guideline.

We calculated summative scores of overall reporting quality grading CONSORT items as follows:

(i) adequately reported (2 points), (ii) inadequately reported (1 point), and (iii) not reported (0

1  
2  
3 137 points). Depending on the study design, these overall reporting quality scores (RQS) could thus  
4  
5 138 theoretically range from 0 to 30 for RCTs (15 CONSORT-A items) and from 0 to 46 for CRTs (eight  
6  
7 139 additional CONSORT-C items). We transformed RQS to standardized percentages with possible  
8  
9 140 ranges from 0 (lowest reporting quality) to 100 (highest reporting quality). We compared  
10  
11 141 unstructured (1 section), structured (2-4 sections) and highly structured (>4 sections) abstracts  
12  
13 142 [24] in relation to RQS using the Kruskal-Wallis test. We fitted separate linear regression models  
14  
15 143 to quantify associations between overall reporting quality and (i) number of authors, (ii) sample  
16  
17 144 size, (iii) number of sampling points, (iv) abstract word count, (v) journal impact factor and (vi) year  
18  
19 145 of publication. Because of heavily skewed distributions (Supplementary S6) we log-transformed  
20  
21 146 (log 10) the first five abovementioned variables for analysis. We used RStudio (R version 4.1.1)  
22  
23 147 for data analysis.  
24  
25  
26

## 27 148 **2.5 Patient and public involvement**

28  
29 149 Instead of patient data we used information of previously published trial reports. Thus, no patients  
30  
31 150 or public were involved in this study. Yet, our results can inform authors, editors, reviewers, and  
32  
33 151 readers of the scientific literature.  
34  
35  
36 152

## 39 153 **3 RESULTS**

### 42 154 **3.1 Included abstracts**

43  
44 155 We screened the title and abstract of 4279 articles and the full text of 520 articles, and we  
45  
46 156 ultimately included 169 articles in the data synthesis (Figure 1). Interrater reliability as assessed  
47  
48 157 by Cohen's kappa (unweighted) for the agreement between the three reviewer pairs (article  
49  
50 158 eligible vs. non-eligible) was moderate in the title and abstract screening with  $\kappa=0.39$ ,  $\kappa=0.47$  and  
51  
52 159  $\kappa=0.55$  and higher in the full text screening with  $\kappa=0.59$ ,  $\kappa=0.73$  and  $\kappa=0.67$ . For interrater  
53  
54 160 reliability on CONSORT items, please refer to Supplementary S7.  
55  
56  
57  
58  
59  
60

1  
2  
3 161 Of all 169 articles, 61% were reports on RCTs (n=103) and 39% reports on CRTs (n=66). More  
4  
5 162 than half of these articles were published between 2015 and 2020 (Supplementary S8). Median  
6  
7 163 number of authors was five (range: 1 – 24, Q1: 4, Q3: 8). Sample size ranged from 23 to 12,391  
8  
9 164 participants, with a median of 271 (Q1: 120, Q3: 670). Twenty-one of the reported studies were  
10  
11 165 performed at a single site, while 117 were reports of multicenter studies. Median abstract word  
12  
13 166 count was 225 words, with range from 68 to 623 (Q1: 175, Q3: 253). The median journal impact  
14  
15 167 factor was 3.2 (Q1: 2.1, Q3: 4.3). Fifty-seven percent of the included abstracts were unstructured  
16  
17 168 (n=97), one-third of the abstracts were structured with two to four sections (n=56), and the  
18  
19 169 remaining 10% were highly structured (n=16), i.e., with more than four sections.  
20  
21

### 22 170 **3.2 Adherence to CONSORT for abstracts**

23  
24  
25 171 Figure 2 summarizes the results on adherence to CONSORT for abstracts items, i.e. the  
26  
27 172 proportion of trial abstracts reporting item information adequately, inadequately and not at all  
28  
29 173 (please see also Supplementary S7 for exact figures). The percentage of adequate reporting  
30  
31 174 among general items ranged from 58.0% (item *01 Title*) to 30.2% (item *02 Trial design*). With  
32  
33 175 regards to trial methodology, the highest percentage of adequate reporting was in item *05*  
34  
35 176 *Objective* and the lowest in item *08 Blinding*. Regarding trial results, item *13 Conclusions* had the  
36  
37 177 highest percentage of adequate reporting (36.7%) and item *12 Harms* the lowest (0.6%).  
38  
39

### 40 178 **3.3 Overall reporting quality and associated factors**

41  
42  
43 179 The distribution of the RQS among all abstracts and stratified by study design is depicted in Figure  
44  
45 180 3.

46  
47  
48 181 The graphs in Figure 4 visualize the relationship of trial and journal characteristics with RQS.  
49  
50 182 Number of authors, abstract word count and journal impact factor were positively associated with  
51  
52 183 RQS. For example, for every 10% increase in the journal impact factor, the RQS increased by  
53  
54 184 about 1.9 percentage points (calculation: coefficient  $5.6 \times \log(1.10) \approx 1.9$ ). Structured (2-4  
55  
56 185 sections) and in particular highly structured abstracts (>4 sections) had a higher RQS than  
57  
58

1  
2  
3 186 unstructured abstracts (1 section). Sample size and number of sampling points were not related  
4  
5 187 to RQS. Finally, after publication of CONSORT-A in 2008, RQS annually increased by 0.57 units.  
6  
7  
8 188 An additional before-and-after comparison illustrates that the RQS was higher in the period from  
9  
10 189 2008 to 2020 (median: 36.7, Q1: 30.0, Q3: 43.5) than in the period from 2003 to 2007 (median:  
11  
12 190 32.0, Q1: 22.9, Q3: 41.8).

## 15 16 191 **4 DISCUSSION**

17  
18 192 In the present study, we assessed reporting quality for abstracts of child and adolescent  
19  
20 193 depression prevention trial reports. Overall, we found that adherence with CONSORT-A and  
21  
22 194 -C for abstracts is suboptimal in journal articles reporting on such studies between 2003 and  
23  
24 195 2020.

### 25 26 27 28 196 **4.1 Comparison with previous studies**

29  
30 197 Meta-epidemiological studies of reporting quality follow two distinct methodological approaches.  
31  
32 198 In the journal-based approach, one or more journals are selected, usually top journals in a specific  
33  
34 199 field with a high-impact factor, and the published articles are assessed. Examples comprise  
35  
36 200 studies on the abstract reporting quality in general [15, 16, 25–27] and internal medicine, [28–  
37  
38 201 30] anesthesiology, [31–33] surgery, [34, 35] nursing [36] and critical care.[37] The only prior  
39  
40 202 study on abstracts of psychiatric trials followed this approach as well. [21] However, the  
41  
42 203 restriction to top journals could affect generalizability, as a higher impact factor may be associated  
43  
44 204 with better reporting quality. [21, 28, 36, 38–42] Thus, journal-based meta-epidemiological studies  
45  
46 205 might overestimate the quality of abstract reporting. On the contrary, in the topic-based approach,  
47  
48 206 no constraints are made regarding the journals. Instead, literature databases are systematically  
49  
50 207 searched for articles on a specific disease, therapy or other topic.[38, 39, 42–48] This increases  
51  
52 208 the variety of journals, making it difficult to draw conclusions about reporting quality of specific  
53  
54  
55  
56  
57  
58  
59  
60

209 journals. However, the topic-based approach increases generalizability by also including journals  
210 with a lower impact factor and thus provide a more complete picture of reporting quality.

211

#### 212 4.1.1 General items

213 In our study, the general items *01 Title* and *02 Trial design* were adequately reported in about  
214 60% and 30% of trial abstracts, respectively. Similarly, Song et al. reported in their study that  
215 66% of trials stated “randomized” in the title but only 14% of trials described the study design  
216 in the abstract.[21]

217 CONSORT-C requires that abstracts are denoted as cluster randomized in the title (item *01*  
218 *Title (cluster extension)*). In our study, however, only one third of all CRT abstracts adequately  
219 reported this item. To our knowledge, the present study is the first to examine adherence to  
220 CONSORT-C guidelines in CRT abstracts. Yet, some meta-epidemiological studies examined  
221 adherence to CONSORT-C for full texts, which includes the same item. For example, Chan  
222 et al. showed that about two thirds of pilot or feasibility CRT reports published between 2011  
223 and 2014 adequately met this CONSORT item. [49] Similarly, Ivers et al., Diaz-Ordaz et al.,  
224 and Walleser et al. found that 48%, 60%, and 98% of CRTs, respectively, state in the title or  
225 abstract that the study is a CRT. [50–52]

#### 226 4.1.2 Trial methodology

227 Among all 169 included abstracts, 36% adequately reported both eligibility criteria for participants  
228 and setting. In line with many previous studies,[16, 21, 28, 33, 37, 53] we extracted the originally  
229 combined information for CONSORT item *03 Participants* using separate dimensions: (i) eligibility  
230 criteria for participants and (ii) eligibility criteria for settings. In contrast, other studies assessed  
231 reporting of eligibility criteria for participants only.[26, 43, 54, 55] It is not surprising that these  
232 studies show the highest proportions of adequate reporting for this item.

1  
2  
3 233 We found that 98% of abstracts failed to adequately include information on how participants were  
4  
5 234 assigned to interventions and that 96% of abstracts lacked complete information on whether  
6  
7 235 participants, program deliverer and data collectors/analysts were blinded. With a few  
8  
9 236 exceptions,[16, 36, 42–44, 48] most previous studies reported adherence to these items of well  
10  
11 237 below 10%. [15, 21, 25, 26, 28–35, 37–41, 45, 46, 55–60]

### 14 238 4.1.3 Trial results

16  
17 239 The number of participants randomized to each group was adequately reported in approximately  
18  
19 240 a third of all abstracts and only four percent of the included trial abstracts adequately reported the  
20  
21 241 number of participants analyzed in each group. This gap between item 09 *Numbers randomized*  
22  
23 242 and item 10 *Numbers analyzed* has also been observed in previous studies. [57]

24  
25  
26 243 Only one article in our sample elaborated on adverse or unintended effects in the abstract,  
27  
28 244 whereas all other 168 abstracts failed to mention important adverse events or side effects (item  
29  
30 245 12 *Harms*). Other meta-epidemiological studies found considerably higher proportions of  
31  
32 246 adequate reporting for this item, particularly trials that also included pharmacologic interventions.  
33  
34 247 [26, 34, 44]

35  
36  
37 248 Finally, our study showed that about 12% of abstracts adequately reported the item 15 *Funding*.  
38  
39 249 Many meta-epidemiological studies even found the proportion of abstracts that adequately report  
40  
41 250 funding is in the single digits [21, 30, 33, 37, 40, 46, 59, 61] or even zero percent. [29, 31, 32, 34,  
42  
43 251 35, 38, 41, 45, 55–57, 60] However, it may be rather the journal regulations than CONSORT to  
44  
45 252 influence whether funding information appears in the abstract or in another place, for example at  
46  
47 253 the end of the manuscript.

### 50 254 4.1.4 Associations with overall reporting quality

51  
52  
53 255 In line with previous findings,[28, 39–41, 46, 59] we observed that overall reporting quality  
54  
55 256 increases with the number of authors. In contrast, some studies found no such relationship.[21,

1  
2  
3 257 36, 46, 56–58] Other studies suggest, although not consistently[62], that the involvement of  
4  
5 258 methodologists is associated with higher reporting quality.[51, 63, 64] However, number of authors  
6  
7 259 may reflect at least to some extent whether author groups include methodologists.

8  
9  
10 260 Furthermore, overall reporting quality seems to be positively related with the abstract word count.  
11  
12 261 This observation is consistent with the results of previous meta-epidemiological studies. [39–43,  
13  
14 262 46, 48, 56, 61] It seems that the more words authors have at their disposal, the more information  
15  
16 263 they can provide.

17  
18  
19 264 Our data suggests that a higher journal impact factor correlates with increased overall reporting  
20  
21 265 quality. If the impact factor is an indicator for journal quality,[65] journals with a higher impact factor  
22  
23 266 may apply more rigorous quality control to reporting. This result would thus underline that  
24  
25 267 restricting studies to top journals may hamper generalizability.

26  
27  
28 268 We observed that structured abstracts showed higher overall reporting quality compared to  
29  
30 269 unstructured abstracts. With some exceptions,[16, 40, 46, 48, 57] many meta-epidemiological  
31  
32 270 studies have shown similar results both since [21, 28, 36, 39, 41, 42, 56, 61] and before the  
33  
34 271 publication of CONSORT-A.[66–72] However, few studies also suggest that structured abstracts  
35  
36 272 are not superior [73–75] and that abstract structure was unrelated to reporting quality.[76]

37  
38  
39 273 In line with previous studies, we found that abstract reporting quality was higher in the period since  
40  
41 274 the publication of CONSORT-A as compared to the period before. [21, 26, 29, 34, 38, 40, 41]  
42  
43 275 However, our data do not allow causal conclusions. Our data indicate that overall reporting quality  
44  
45 276 is improving since 2008: in contrast to the period from 2003 to 2007, the RQS increased between  
46  
47 277 2008 and 2020. Chhapola et al. observed a similar trend comparing the reporting quality of trial  
48  
49 278 abstracts published in high-impact paediatric journals in 2003 to 2007 and 2010 to 2014. [77]

## 52 53 279 **4.2 Strengths and limitations**

54  
55 280 This study is the first on reporting quality of trial abstracts in childhood depression prevention. Key  
56  
57 281 strength of our study is the topic-based approach we have chosen; compared to journal-based

1  
2  
3 282 studies, our results provide a more complete picture of abstract reporting in the field. We carried  
4  
5 283 out an extensive, reproducible methodology to screen the literature for eligible studies and retrieve  
6  
7 284 study information. We analysed abstracts published over a broad timespan allowing for  
8  
9 285 comparison of reporting quality before and after publication of CONSORT guidelines. We assess  
10  
11 286 adherence not only to CONSORT-A for RCT abstracts but also to CONSORT-C for CRT abstracts,  
12  
13 287 which was not evaluated by any prior study.

14  
15  
16 288 We applied CONSORT to measure reporting quality, although it was not designed for this purpose.  
17  
18 289 However, in the current absence of standardized tools for assessment, validated guidelines such  
19  
20 290 as CONSORT are the best available choice to evaluate reporting quality. Moreover, CONSORT  
21  
22 291 for social and psychological interventions were not checked for adherence. [78, 79] However,  
23  
24 292 these guidelines were only published in 2017 and 2018, respectively, and thus few studies could  
25  
26 293 have considered these standards. We assess the reporting quality of trial abstracts and cannot  
27  
28 294 draw conclusions about the quality of reporting in the main text. Reviewers were not blinded to  
29  
30 295 trial and journal characteristics such as authors, publication date and impact factor, during the  
31  
32 296 study selection and the data extraction. We can therefore not exclude the possibility of bias in the  
33  
34 297 evaluation due to metadata insight of the judging reviewers.

35  
36  
37  
38 298 When we calculated overall reporting quality scores, we treated each CONSORT item equally,  
39  
40 299 although some items could be more or less relevant than others.[30, 37, 43] These scores are  
41  
42 300 simplified proxies to represent reporting quality with a single measure. The assessment of  
43  
44 301 reporting quality should however primarily be based on the individual items. [31]

45  
46  
47 302 We did not assess associations between overall reporting quality and journal requirements, such  
48  
49 303 as word count limits and format structure. However, the word count and structure of the included  
50  
51 304 abstracts may largely reflect these journal requirements.

52  
53  
54 305 We used descriptive modelling to explore factors associated of reporting quality; neither predictive  
55  
56 306 nor causal conclusions can be derived from this. Unmeasured factors such as journal



1  
2  
3 307 endorsement of CONSORT [80] may also be associated with reporting quality. Findings from our  
4  
5 308 secondary research aim may thus be incomplete and should be interpreted with caution.  
6  
7

### 8 309 **4.3 Conclusions**

9  
10 310 Reporting quality plays a crucial role in generating and translating scientific evidence as it  
11  
12 311 increases transparency and accuracy and thereby enables health professionals to identify,  
13  
14 312 evaluate and replicate trial results. CONSORT extensions are valuable tools for authors,  
15  
16 313 reviewers and editors to formulate trial abstracts in a transparent and comprehensible way.  
17  
18 314 Although these tools have been openly available for years, the reporting quality of RCT and CRT  
19  
20 315 abstracts on the prevention of depression in children and adolescents is suboptimal. According to  
21  
22 316 our results, some CONSORT-A and -C items are adequately reported in most depression  
23  
24 317 prevention trial abstracts, and this should be the benchmark for all items. Interventions aimed at  
25  
26 318 strengthening abstract reporting quality are thus needed. [81] These efforts will very likely not only  
27  
28 319 benefit the scientific community and practitioners in the field, but may ultimately improve mental  
29  
30 320 health care for children and adolescents worldwide.  
31  
32  
33

34 321  
35  
36  
37 322  
38  
39  
40 323 **Funding statement.** This research received no specific grant from any funding agency in the  
41  
42 324 public, commercial or not-for-profit sectors.  
43

44  
45 325 **Authors' contributions.** JW is the guarantor. JW conceived the idea for the project. JW and CP  
46  
47 326 developed the concept and methods. JW and JN performed the data selection and extraction. CP  
48  
49 327 gave final instructions when consensus could not be reached. JW performed the statistical  
50  
51 328 analysis and interpreted the study findings. JW drafted the first version of the manuscript. CP  
52  
53 329 contributed to data interpretation, writing, and editing. All authors reviewed and approved the final  
54  
55 330 manuscript before submission.  
56  
57  
58  
59

331 **Ethics.** We analysed information from published abstracts and not from human subjects or  
332 animals. Therefore, ethics committee approval is not required for this study.

333 **Registration.** Even though reporting quality may indirectly affect patient care in the long-term, we  
334 did not assess outcomes of direct patient or clinical relevance. As this is a pre-requisite for  
335 registration, we could not register this study in the international prospective register of systematic  
336 reviews database (PROSPERO).

337 **Competing interests' statement.** All authors declare that they have no competing interests  
338 regarding the publication of this article.

339 **Acknowledgements.** We would like to thank Dr Jan Taubitz at the Medical Library, Charité -  
340 Universitätsmedizin Berlin, who with his expertise provided support for the research project in the  
341 development and evaluation of the literature search strategy.

342 **Reporting guidelines.** Strictly speaking, meta-epidemiological studies are not systematic  
343 reviews. Nevertheless, we used an adapted version of the Preferred Reporting Items for  
344 Systematic Reviews and Meta-Analyses (PRISMA) checklist to report our research (see PRISMA  
345 checklist available from the OSF repository).

346 **Data sharing statement.** Statistical code and dataset available from the OSF repository, [23]

347 **Keywords.** Meta-research, methodology research, quality of reporting, mental health, paediatrics,  
348 psychiatry, psychology

349 Additional MeSH: Depression, Research Report, Reproducibility of Results, Checklist, Reference  
350 Standards, Quality Control, Child, Adolescent

## 351 **FIGURES AND ILLUSTRATIONS**

352 Figure 1: PRISMA flowchart depicting the study selection process.

1  
2  
3 353 Figure 2: Percentage of abstracts adhering to CONSORT items in 169 trial reports on the  
4  
5 354 prevention of depression in children and adolescents.  
6  
7

8 355 Figure 3: Distribution of overall reporting quality by study design.  
9

10  
11 356 Figure 4: Associations of overall reporting quality with abstract and journal characteristics.  
12  
13  
14  
15  
16  
17  
18  
19  
20  
21  
22  
23  
24  
25  
26  
27  
28  
29  
30  
31  
32  
33  
34  
35  
36  
37  
38  
39  
40  
41  
42  
43  
44  
45  
46  
47  
48  
49  
50  
51  
52  
53  
54  
55  
56  
57  
58  
59  
60

## 357 5 REFERENCES

- 358 1 Simera, I., Moher, D., Hirst, A., Hoey, J., Schulz, K. F., & Altman, D. G. Transparent and  
359 accurate reporting increases reliability, utility, and impact of your research: reporting  
360 guidelines and the EQUATOR Network. *BMC medicine* 2010;8(24).
- 361 2 Brown SD, Furrow D, Hill DF, et al. A Duty to Describe. *Perspect Psychol Sci*  
362 2014;9(6):626–40.
- 363 3 Chalmers I, Glasziou P. Avoidable waste in the production and reporting of research  
364 evidence. *The Lancet* 2009;374(9683):86–89.
- 365 4 Altman DG, Moher D. Importance of Transparent Reporting of Health Research. In: Moher  
366 D, Altman DG, Schulz KF, et al., eds. *Guidelines for Reporting Health Research: A User's*  
367 *Manual*: John Wiley & Sons, Ltd 2014:1–13.
- 368 5 Begg C. Improving the Quality of Reporting of Randomized Controlled Trials. *JAMA*  
369 1996;276(8):637.
- 370 6 Moher D, Schulz KF, Altman DG. The CONSORT statement: revised recommendations for  
371 improving the quality of reports of parallel-group randomised trials. *The Lancet*  
372 2001;357(9263):1191–94.
- 373 7 Schulz KF, Altman DG, Moher D. CONSORT 2010 Statement: updated guidelines for  
374 reporting parallel group randomised trials. *BMJ* 2010;340(mar23 1):c332-c332.
- 375 8 Moher D, Hopewell S, Schulz KF, et al. CONSORT 2010 Explanation and Elaboration:  
376 updated guidelines for reporting parallel group randomised trials. *BMJ* 2010;340(mar23  
377 1):c869-c869.
- 378 9 Hopewell S, Clarke M, Moher D, et al. CONSORT for reporting randomised trials in journal  
379 and conference abstracts. *The Lancet* 2008;371(9609):281–83.
- 380 10 Hopewell S, Clarke M, Moher D, et al. CONSORT for Reporting Randomized Controlled  
381 Trials in Journal and Conference Abstracts: Explanation and Elaboration. *JAMA*  
382 2008;5(1):e20.

- 1  
2  
3 383 11 Campbell MK, Piaggio G, Elbourne DR, et al. Consort 2010 statement: extension to cluster  
4 384 randomised trials. *BMJ* 2012;345(sep04 1):e5661-e5661.  
5  
6  
7 385 12 Dechartres A, Trinquart L, Atal I, et al. Evolution of poor reporting and inadequate methods  
8 386 over time in 20 920 randomised controlled trials included in Cochrane reviews: research on  
9 387 research study. *BMJ* 2017:j2490.  
10  
11  
12  
13 388 13 Turner L, Shamseer L, Altman DG, et al. Does use of the CONSORT Statement impact the  
14 389 completeness of reporting of randomised controlled trials published in medical journals? A  
15 390 Cochrane review. *Systematic Reviews* 2012;1(1):60. [https://doi.org/10.1186/2046-4053-1-](https://doi.org/10.1186/2046-4053-1-60)  
16 391 60.  
17  
18  
19  
20  
21  
22 392 14 Moher D, Jones A, Lepage L, et al. Use of the CONSORT Statement and Quality of  
23 393 Reports of Randomized Trials. *JAMA* 2001;285(15):1992.  
24  
25  
26 394 15 Berwanger O, Ribeiro RA, Finkelsztejn A, et al. The quality of reporting of trial abstracts is  
27 395 suboptimal: Survey of major general medical journals. *J Clin Epidemiol* 2009;62(4):387–92.  
28  
29  
30 396 16 Ghimire S, Kyung E, Kang W, et al. Assessment of adherence to the CONSORT statement  
31 397 for quality of reports on randomized controlled trial abstracts from four high-impact general  
32 398 medical journals. *Trials* 2012;13(1):77. <https://doi.org/10.1186/1745-6215-13-77>.  
33  
34  
35  
36 399 17 Samaan Z, Mbuagbaw L, Kosa S, et al. A systematic scoping review of adherence to  
37 400 reporting guidelines in health care literature. *JMDH* 2013:169.  
38  
39  
40  
41 401 18 Stinson JN. Clinical Trials in the Journal of Pediatric Psychology: Applying the CONSORT  
42 402 Statement. *Journal of Pediatric Psychology* 2003;28(3):159–67.  
43  
44  
45 403 19 Han C, Kwak K, Marks DM, et al. The impact of the CONSORT statement on reporting of  
46 404 randomized clinical trials in psychiatry. *Contemporary Clinical Trials* 2009;30(2):116–22.  
47  
48  
49 405 20 Grant SP, Mayo-Wilson E, Melendez-Torres GJ, et al. Reporting Quality of Social and  
50 406 Psychological Intervention Trials: A Systematic Review of Reporting Guidelines and Trial  
51 407 Publications. *PLoS One* 2013;8(5):e65442.  
52  
53  
54  
55  
56  
57  
58  
59  
60

- 1  
2  
3 408 21 Song SY, Kim B, Kim I, et al. Assessing reporting quality of randomized controlled trial  
4  
5 409 abstracts in psychiatry: Adherence to CONSORT for abstracts: A systematic review. *PLoS*  
6  
7 410 *One* 2017;12(11):e0187807.  
8  
9 411 22 Jones TH, Hanney S, Buxton MJ. The information sources and journals consulted or read  
10  
11 412 by UK paediatricians to inform their clinical practice and those which they consider  
12  
13 413 important: a questionnaire survey. *BMC Pediatr* 2007;1. doi:10.1186/1471-2431-7-1  
14  
15 414 [published Online First: 15 January 2007].  
16  
17  
18 415 [dataset] 23 Wiehn J, Nonte J, Prugger C. Reporting quality of randomised controlled and  
19  
20 416 cluster randomised trial abstracts in childhood depression prevention: A meta-  
21  
22 417 epidemiologic study: Open Science Framework, May 31, 2022.  
23  
24 418 <https://doi.org/10.17605/OSF.IO/AHZWN>  
25  
26 419 24 Hua F, Walsh T, Glennly A-M, et al. Structure formats of randomised controlled trial  
27  
28 420 abstracts: a cross-sectional analysis of their current usage and association with  
29  
30 421 methodology reporting. *BMC Med Res Methodol* 2018;18(1):6. doi:10.1186/s12874-017-  
31  
32 422 0469-3 [published Online First: 10 January 2018].  
33  
34  
35 423 25 Chen Y, Li J, Ai C, et al. Assessment of the quality of reporting in abstracts of randomized  
36  
37 424 controlled trials published in five leading Chinese medical journals. *PLoS One*  
38  
39 425 2010;5(8):e11926. doi:10.1371/journal.pone.0011926 [published Online First: 2 August  
40  
41 426 2010].  
42  
43 427 26 Mbuagbaw L, Thabane M, Vanniyasingam T, et al. Improvement in the quality of abstracts  
44  
45 428 in major clinical journals since CONSORT extension for abstracts: a systematic review.  
46  
47 429 *Contemporary Clinical Trials* 2014;38(2):245–50. doi:10.1016/j.cct.2014.05.012 [published  
48  
49 430 Online First: 23 May 2014].  
50  
51 431 27 Hays M, Andrews M, Wilson R, et al. Reporting quality of randomised controlled trial  
52  
53 432 abstracts among high-impact general medical journals: a review and analysis. *BMJ Open*  
54  
55 433 2016;6(7):e011082.  
56  
57  
58  
59  
60

- 1  
2  
3 434 28 Bigna JJR, Noubiap JJN, Asangbeh SL, et al. Abstracts reporting of HIV/AIDS randomized  
4  
5 435 controlled trials in general medicine and infectious diseases journals: completeness to date  
6  
7 436 and improvement in the quality since CONSORT extension for abstracts. *BMC Med Res*  
8  
9 437 *Methodol* 2016;16(1):138. doi:10.1186/s12874-016-0243-y [published Online First: 13  
10  
11 438 October 2016].
- 13 439 29 Sriganesh K, Bharadwaj S, Wang M, et al. Quality of abstracts of randomized control trials  
14  
15 440 in five top pain journals: A systematic survey. *Contemporary Clinical Trials*  
16  
17 441 *Communications* 2017;7:64–68. doi:10.1016/j.conctc.2017.06.001 [published Online First:  
18  
19 442 9 June 2017].
- 22 443 30 Khan MS, Shaikh A, Ochani RK, et al. Assessing the Quality of Abstracts in Randomized  
23  
24 444 Controlled Trials Published in High Impact Cardiovascular Journals. *Circ: Cardiovascular*  
25  
26 445 *Quality and Outcomes* 2019;12(5):532.
- 28 446 31 Chow JTY, Turkstra TP, Yim E, et al. The degree of adherence to CONSORT reporting  
29  
30 447 guidelines for the abstracts of randomised clinical trials published in anaesthesia journals:  
31  
32 448 A cross-sectional study of reporting adherence in 2010 and 2016. *Eur J Anaesthesiol*  
33  
34 449 2018;942–48. doi:10.1097/EJA.0000000000000880 [published Online First: 17 September  
35  
36 450 2018].
- 39 451 32 Can OS, Yilmaz AA, Hasdogan M, et al. Has the quality of abstracts for randomised  
40  
41 452 controlled trials improved since the release of Consolidated Standards of Reporting Trial  
42  
43 453 guideline for abstract reporting? A survey of four high-profile anaesthesia journals. *Eur J*  
44  
45 454 *Anaesthesiol* 2011;28(7):485–92.
- 47 455 33 Janackovic K, Puljak L. Reporting quality of randomized controlled trial abstracts in the  
48  
49 456 seven highest-ranking anesthesiology journals. *Trials* 2018;19(1):591.  
50  
51 457 <https://pubmed.ncbi.nlm.nih.gov/30373644>.
- 53 458 34 Speich B, Mc Cord KA, Agarwal A, et al. Reporting Quality of Journal Abstracts for Surgical  
54  
55 459 Randomized Controlled Trials Before and After the Implementation of the CONSORT

- 1  
2  
3 460 Extension for Abstracts. *World J Surg* 2019;2371–78. doi:10.1007/s00268-019-05064-1  
4  
5 461 [published Online First: 20 June 2019].  
6  
7 462 35 Gallo L, Wakeham S, Dunn E, et al. The Reporting Quality of Randomized Controlled Trial  
8  
9 463 Abstracts in Plastic Surgery. *Aesthet Surg J* 2020;40(3):335–41.  
10  
11 464 36 Zhang J, RN WS, Ying Y, et al. Abstracts Reporting of Randomized Controlled Trials in Ten  
12  
13 465 Highest-ranking Nursing Journals: Improvement in the Quality Since CONSORT Extension  
14  
15 466 for Abstracts 2021.  
16  
17 467 37 Kuriyama A, Takahashi N, Nakayama T. Reporting of critical care trial abstracts: a  
18  
19 468 comparison before and after the announcement of CONSORT guideline for abstracts.  
20  
21 469 *Trials* 2017;18(1):32. doi:10.1186/s13063-017-1786-x [published Online First: 21 January  
22  
23 470 2017].  
24  
25 471 38 Cui Q, Tian J, Song X, et al. Does the CONSORT checklist for abstracts improve the  
26  
27 472 quality of reports of randomized controlled trials on clinical pathways? *J Eval Clin Pract*  
28  
29 473 2014;20(6):827–33. doi:10.1111/jep.12200 [published Online First: 11 June 2014].  
30  
31 474 39 Wang D, Chen L, Wang L, et al. Abstracts for reports of randomized trials of COVID-19  
32  
33 475 interventions had low quality and high spin. *J Clin Epidemiol* 2021;139:107–20.  
34  
35 476 40 Hua F, Deng L, Kau CH, et al. Reporting quality of randomized controlled trial abstracts.  
36  
37 477 *The Journal of the American Dental Association* 2015;146(9):669-678.e1.  
38  
39 478 41 Chen J, Li Z, Liu B, et al. Quality improvement in randomized controlled trial abstracts in  
40  
41 479 prosthodontics since the publication of CONSORT guideline for abstracts: a systematic  
42  
43 480 review. *J Dent* 2018;23–29. doi:10.1016/j.jdent.2018.04.025 [published Online First: 6 May  
44  
45 481 2018].  
46  
47 482 42 Guo J-W, Iribarren SJ. Reporting quality for abstracts of randomized controlled trials in  
48  
49 483 cancer nursing research. *Cancer Nurs* 2014;37(6):436–44.  
50  
51 484 43 Baulig C, Krummenauer F, Geis B, et al. Reporting quality of randomised controlled trial  
52  
53 485 abstracts on age-related macular degeneration health care: a cross-sectional quantification  
54  
55  
56  
57  
58  
59  
60



- 1  
2  
3 486 of the adherence to CONSORT abstract reporting recommendations. *BMJ Open*  
4  
5 487 2018;8(5):e021912. doi:10.1136/bmjopen-2018-021912 [published Online First: 22 May  
6  
7 488 2018].  
8  
9 489 44 Sivendran S, Newport K, Horst M, et al. Reporting quality of abstracts in phase III clinical  
10  
11 490 trials of systemic therapy in metastatic solid malignancies. *Trials* 2015;16:341.  
12  
13 491 doi:10.1186/s13063-015-0885-9 [published Online First: 8 August 2015].  
14  
15 492 45 Kumar S, Mohammad H, Vora H, et al. Reporting Quality of Randomized Controlled Trials  
16  
17 493 of Periodontal Diseases in Journal Abstracts-A Cross-sectional Survey and Bibliometric  
18  
19 494 Analysis. *J Evid Based Dent Pract* 2018;18(2):130-141.e22.  
20  
21 495 doi:10.1016/j.jebdp.2017.08.005 [published Online First: 21 September 2017].  
22  
23 496 46 Fang X, Hua F, Riley P, et al. Abstracts of published randomized controlled trials in  
24  
25 497 Endodontics: reporting quality and spin. *Int Endod J* 2020;53(8):1050–61.  
26  
27 498 47 Shaqman M, Al-Abedalla K, Wagner J, et al. Reporting quality and spin in abstracts of  
28  
29 499 randomized clinical trials of periodontal therapy and cardiovascular disease outcomes.  
30  
31 500 *PLoS One* 2020;15(4):e0230843. <https://doi.org/10.1371/journal.pone.0230843>.  
32  
33 501 48 Knippschild S, Loddenkemper J, Tulka S, et al. Assessment of reporting quality in  
34  
35 502 randomised controlled clinical trial abstracts of dental implantology published from 2014 to  
36  
37 503 2016. *BMJ Open* 2021;11(8):e045372.  
38  
39 504 49 Chan CL, Leyrat C, Eldridge SM. Quality of reporting of pilot and feasibility cluster  
40  
41 505 randomised trials: a systematic review. *BMJ Open* 2017;7(11):e016970.  
42  
43 506 50 Ivers NM, Taljaard M, Dixon S, et al. Impact of CONSORT extension for cluster  
44  
45 507 randomised trials on quality of reporting and study methodology: review of random sample  
46  
47 508 of 300 trials, 2000-8. *BMJ* 2011;343:d5886.  
48  
49 509 51 Diaz-Ordaz K, Froud R, Sheehan B, et al. A systematic review of cluster randomised trials  
50  
51 510 in residential facilities for older people suggests how to improve quality. *BMC Med Res*  
52  
53 511 *Methodol* 2013;13(1):127. <https://doi.org/10.1186/1471-2288-13-127>.  
54  
55  
56  
57  
58  
59  
60

- 1  
2  
3 512 52 Walleser S, Hill SR, Bero LA. Characteristics and quality of reporting of cluster randomized  
4  
5 513 trials in children: reporting needs improvement. *J Clin Epidemiol* 2011;64(12):1331–40.  
6  
7 514 53 Hua F, Sun Q, Zhao T, et al. Reporting quality of randomised controlled trial abstracts  
8  
9 515 presented at the SLEEP Annual Meetings: a cross-sectional study. *BMJ Open*  
10  
11 516 2019;9(7):e029270. doi:10.1136/bmjopen-2019-029270 [published Online First: 16 July  
12  
13 517 2019].  
14  
15 518 54 Yoon U, Knobloch K. Quality of reporting in sports injury prevention abstracts according to  
16  
17 519 the CONSORT and STROBE criteria: an analysis of the World Congress of Sports Injury  
18  
19 520 Prevention in 2005 and 2008. *Br J Sports Med* 2012;46(3):202–06.  
20  
21 521 doi:10.1136/bjism.2008.053876 [published Online First: 26 July 2009].  
22  
23 522 55 Wang L, Li Y, Li J, et al. Quality of reporting of trial abstracts needs to be improved: using  
24  
25 523 the CONSORT for abstracts to assess the four leading Chinese medical journals of  
26  
27 524 traditional Chinese medicine. *Trials* 2010;11:75.  
28  
29 525 <https://pubmed.ncbi.nlm.nih.gov/20615225>.  
30  
31 526 56 Jin L, Hua F, Cao Q. Reporting quality of randomized controlled trial abstracts published in  
32  
33 527 leading laser medicine journals: an assessment using the CONSORT for abstracts  
34  
35 528 guidelines. *Lasers Med Sci* 2016;31(8):1583–90. doi:10.1007/s10103-016-2018-4  
36  
37 529 [published Online First: 30 June 2016].  
38  
39 530 57 Fleming PS, Buckley N, Seehra J, et al. Reporting quality of abstracts of randomized  
40  
41 531 controlled trials published in leading orthodontic journals from 2006 to 2011. *Am J Orthod*  
42  
43 532 *Dentofacial Orthop* 2012;142(4):451–58.  
44  
45 533 58 Seehra J, Wright NS, Polychronopoulou A, et al. Reporting quality of abstracts of  
46  
47 534 randomized controlled trials published in dental specialty journals. *J Evid Based Dent Pract*  
48  
49 535 2013;13(1):1–8.  
50  
51 536 59 Kiriakou J, Pandis N, Madianos P, et al. Assessing the reporting quality in abstracts of  
52  
53 537 randomized controlled trials in leading journals of oral implantology. *J Evid Based Dent*  
54  
55  
56  
57  
58  
59  
60

- 1  
2  
3 538 *Pract* 2014;14(1):9–15. doi:10.1016/j.jebdp.2013.10.018 [published Online First: 19  
4  
5 539 December 2013].  
6  
7 540 60 Faggion Jr. CM, Giannakopoulos NN. Quality of Reporting in Abstracts of Randomized  
8  
9 541 Controlled Trials Published in Leading Journals of Periodontology and Implant Dentistry: A  
10  
11 542 Survey. *J Periodontol* 2012;83(10):1251–56.  
12  
13 543 61 Menne MC, Pandis N, Faggion CM. Reporting quality of abstracts of randomized controlled  
14  
15 544 trials related to implant dentistry. *J Periodontol* 2021.  
16  
17 545 62 Péron J, You B, Gan HK, et al. Influence of statistician involvement on reporting of  
18  
19 546 randomized clinical trials in medical oncology. *Anticancer Drugs* 2013;24(3):306–09.  
20  
21 547 63 Kloukos D, Papageorgiou SN, Doulis I, et al. Reporting quality of randomised controlled  
22  
23 548 trials published in prosthodontic and implantology journals. *J Oral Rehabil*  
24  
25 549 2015;42(12):914–25.  
26  
27 550 64 Pandis N, Polychronopoulou A, Eliades T. An assessment of quality characteristics of  
28  
29 551 randomised control trials published in dental journals. *J Dent* 2010;38(9):713–21.  
30  
31 552 <https://www.sciencedirect.com/science/article/pii/S0300571210001235>.  
32  
33 553 65 Saha S, Saint S, Christakis DA. Impact factor: a valid measure of journal quality? *J Med*  
34  
35 554 *Libr Assoc* 2003;91(1):42–46. <https://pubmed.ncbi.nlm.nih.gov/12572533>.  
36  
37 555 66 Trakas K, Addis A, Kruk D, et al. Quality Assessment of Pharmacoeconomic Abstracts of  
38  
39 556 Original Research Articles in Selected Journals. *Annals of Pharmacotherapy*  
40  
41 557 1997;31(4):423–28.  
42  
43 558 67 McIntosh N. Abstract information and structure at scientific meetings. *The Lancet*  
44  
45 559 1996;347(9000):544–45.  
46  
47 560 68 Taddio A, Pain T, Fassos FF, et al. Quality of nonstructured and structured abstracts of  
48  
49 561 original research articles in the British Medical Journal, the Canadian Medical Association  
50  
51 562 Journal and the Journal of the American Medical Association. *CMAJ* 1994;150(10):1611–  
52  
53 563 15. <https://pubmed.ncbi.nlm.nih.gov/8174031>.  
54  
55  
56  
57  
58  
59  
60

- 1  
2  
3 564 69 Dupuy A, Khosrotehrani K, Lebbé C, et al. Quality of Abstracts in 3 Clinical Dermatology  
4  
5 565 Journals. *Arch Dermatol* 2003;139(5):589–93.  
6  
7 566 70 Burns KEA, Adhikari NKJ, Kho M, et al. Abstract reporting in randomized clinical trials of  
8  
9 567 acute lung injury: An audit and assessment of a quality of reporting score\*. *Critical Care*  
10  
11 568 *Medicine* 2005;33(9).  
12  
13 569 71 Sandeep Sharma, Jayne E. Harrison. Structured abstracts: Do they improve the quality of  
14  
15 570 information in abstracts? *American Journal of Orthodontics and Dentofacial Orthopedics*  
16  
17 571 2006;130(4):523–30. [https://www.ajodo.org/article/S0889-5406\(06\)00893-6/fulltext](https://www.ajodo.org/article/S0889-5406(06)00893-6/fulltext).  
18  
19  
20 572 72 Rosen AB, Greenberg D, Stone PW, et al. Quality of Abstracts of Papers Reporting  
21  
22 573 Original Cost-Effectiveness Analyses. *Medical Decision Making* 2005;25(4):424–28.  
23  
24 574 73 Scherer RW. Reporting of Randomized Clinical Trial Descriptors and Use of Structured  
25  
26 575 Abstracts. *JAMA* 1998;280(3):269.  
27  
28 576 74 Einarson TR, Lee C, Smith R, et al. Quality and content of abstracts in papers reporting  
29  
30 577 about drug exposures during pregnancy. *Birth Defect Res A* 2006;76(8):621–28.  
31  
32 578 75 Khosrotehrani K, Dupuy A, Lebbé C, et al. [Abstract quality assessment of articles from the  
33  
34 579 *Annales de Dermatologie*]. *Annales de dermatologie et de venerologie* 2002;129(11).  
35  
36 580 <https://pubmed.ncbi.nlm.nih.gov/12514515/>.  
37  
38  
39 581 76 Wong H, Truong D, Mahamed A, et al. Quality of structured abstracts of original research  
40  
41 582 articles in the British Medical Journal, the Canadian Medical Association Journal and the  
42  
43 583 Journal of the American Medical Association: a 10-year follow-up study. *Current Medical*  
44  
45 584 *Research and Opinion* 2005;21(4):467–73.  
46  
47 585 77 Chhapola V, Tiwari S, Brar R, et al. An interrupted time series analysis showed suboptimal  
48  
49 586 improvement in reporting quality of trial abstract. *J Clin Epidemiol* 2016;71:11–17.  
50  
51 587 78 Boutron I, Altman DG, Moher D, et al. CONSORT Statement for Randomized Trials of  
52  
53 588 Nonpharmacologic Treatments: A 2017 Update and a CONSORT Extension for  
54  
55 589 Nonpharmacologic Trial Abstracts. *Annals of Internal Medicine* 2017;167(1):40–47.  
56  
57  
58  
59  
60

- 1  
2  
3 590 79 Montgomery P, Grant S, Mayo-Wilson E, et al. Reporting randomised trials of social and  
4  
5 591 psychological interventions: the CONSORT-SPI 2018 Extension. *Trials* 2018;19(1):407.  
6  
7 592 <https://doi.org/10.1186/s13063-018-2733-1>.  
8  
9 593 80 Sarkis-Onofre R, Poletto-Neto V, Cenci MS, et al. CONSORT endorsement improves the  
10  
11 594 quality of reports of randomized clinical trials in dentistry. *J Clin Epidemiol* 2020;122:20–26.  
12  
13 595 81 Blanco D, Altman D, Moher D, et al. Scoping review on interventions to improve adherence  
14  
15 596 to reporting guidelines in health research. *BMJ Open* 2019;9(5):e026589.  
16  
17  
18 597

1  
2  
3  
4  
5  
6  
7  
8  
9  
10  
11  
12  
13  
14  
15  
16  
17  
18  
19  
20  
21  
22  
23  
24  
25  
26  
27  
28  
29  
30  
31  
32  
33  
34  
35  
36  
37  
38  
39  
40  
41  
42  
43  
44  
45  
46  
47  
48  
49  
50  
51  
52  
53  
54  
55  
56  
57  
58  
59  
60  
Identification  
Screening  
Eligibility  
Included

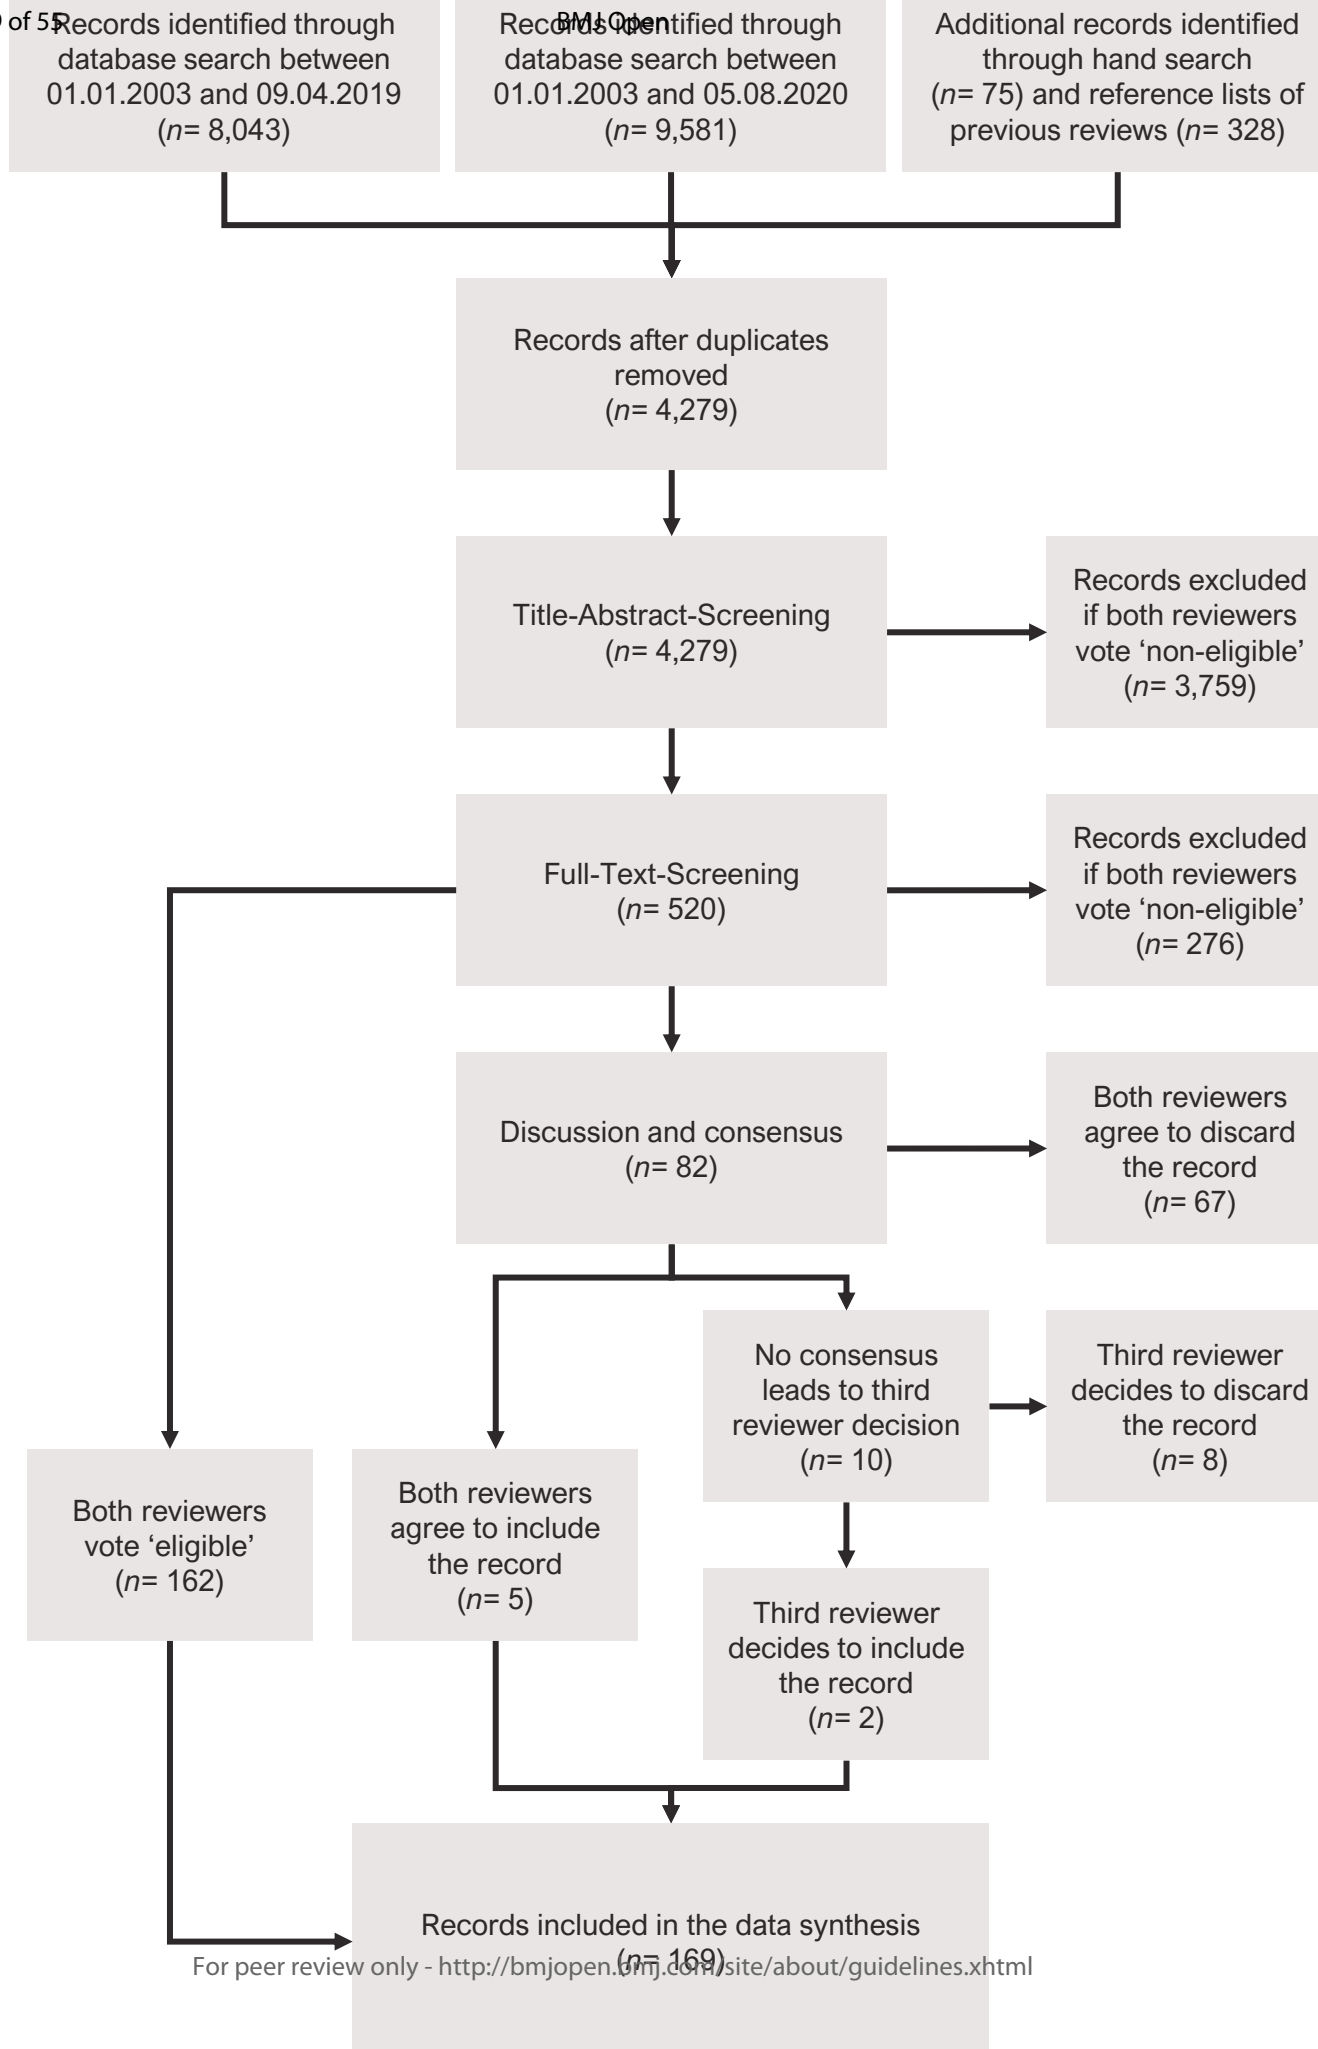

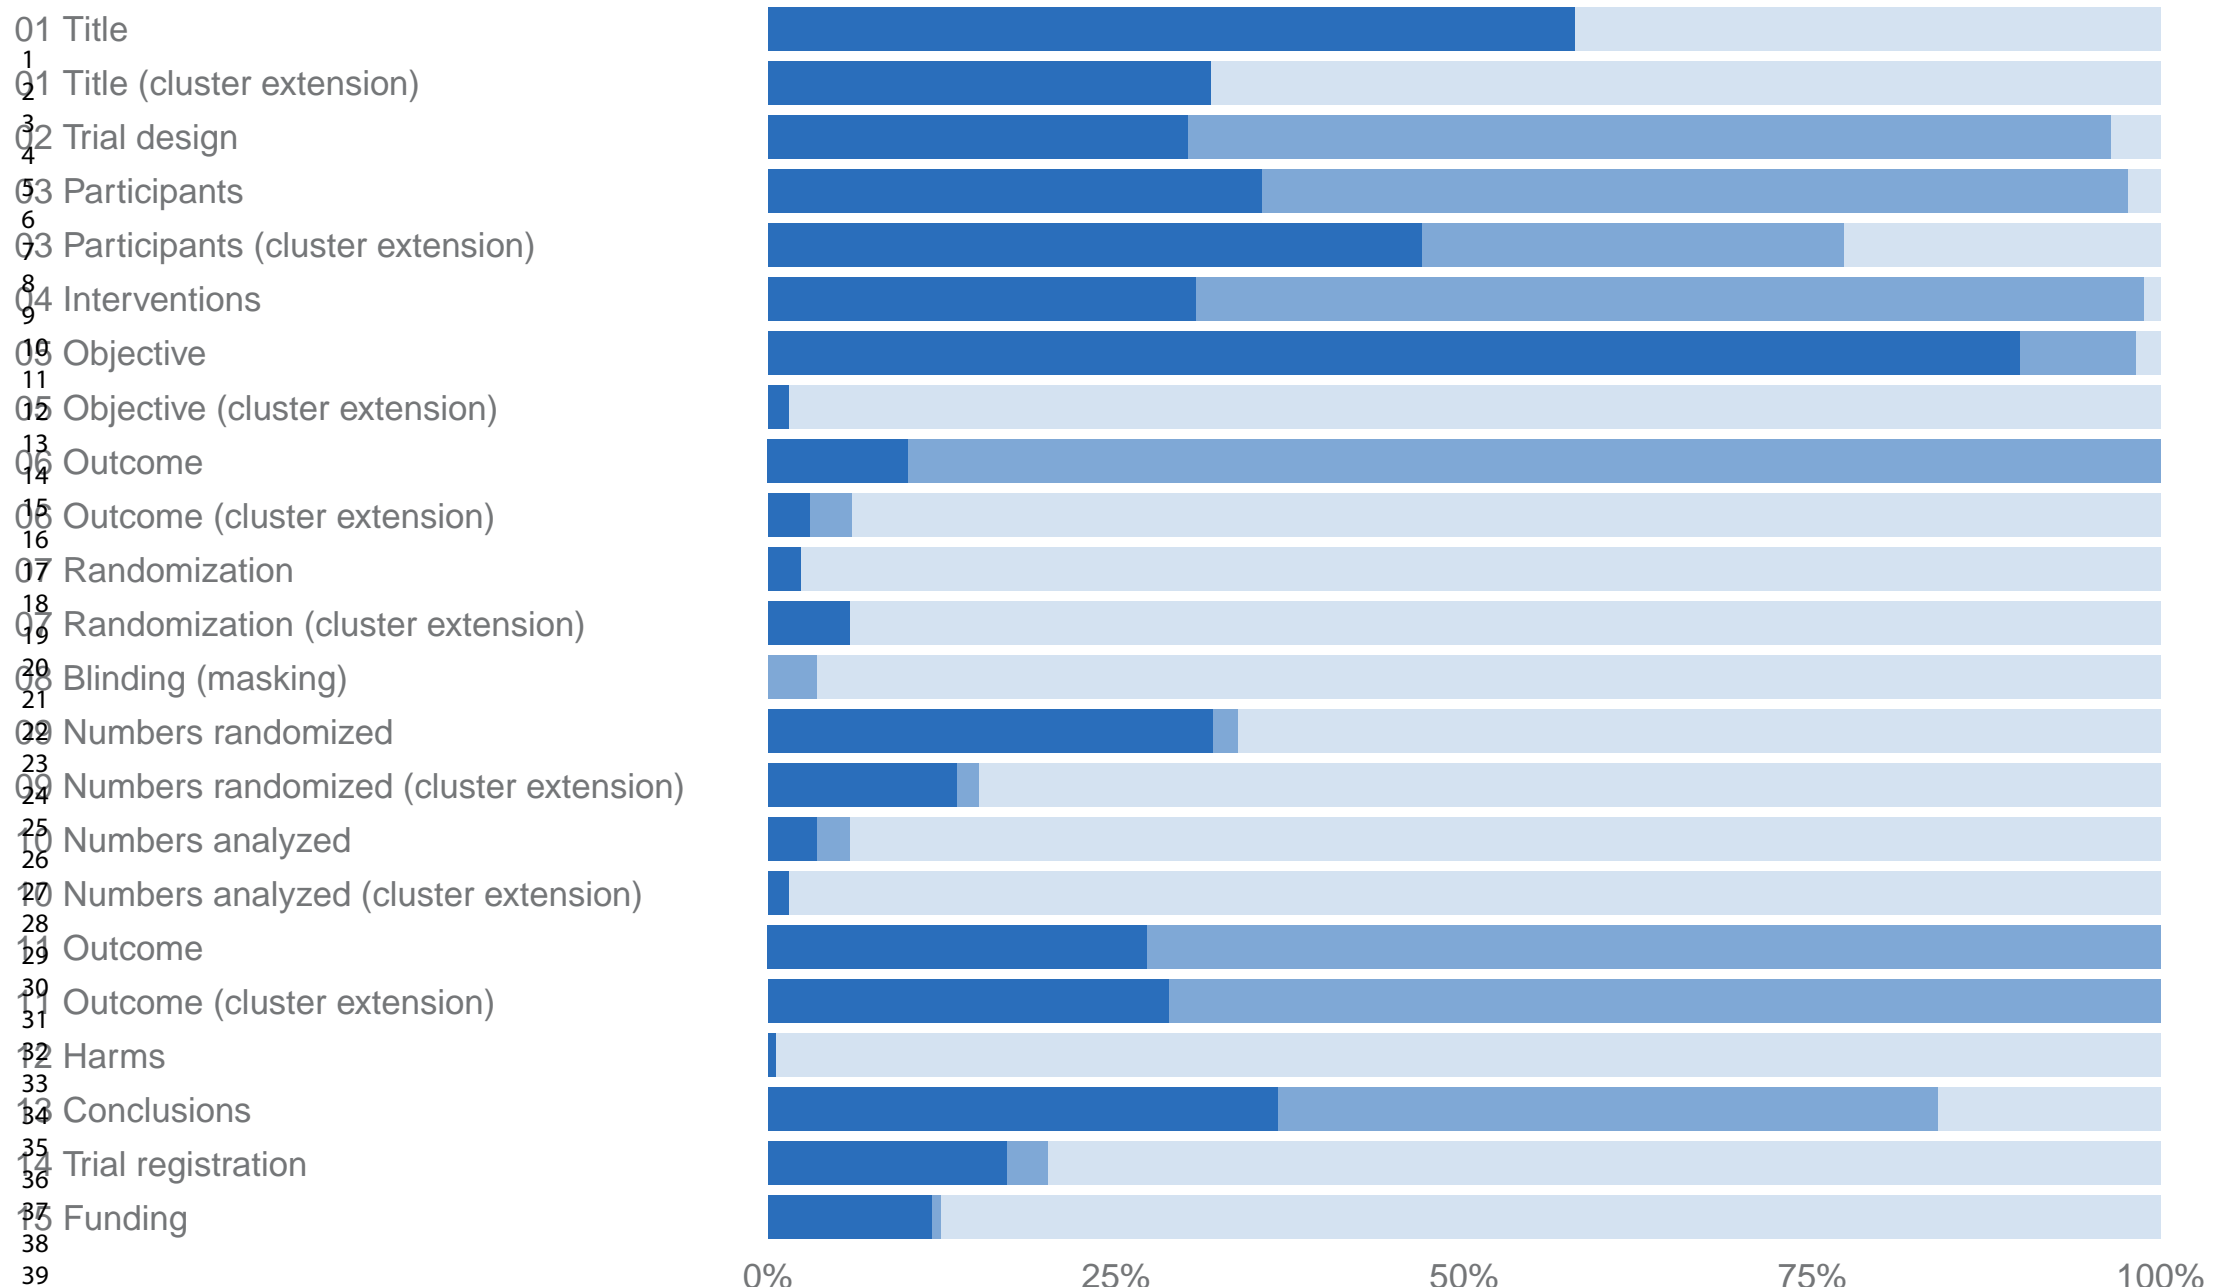

For peer review only - <http://bmjopen.bmj.com/site/about/guidelines.xhtml>

adequately reported    inadequately reported    not reported

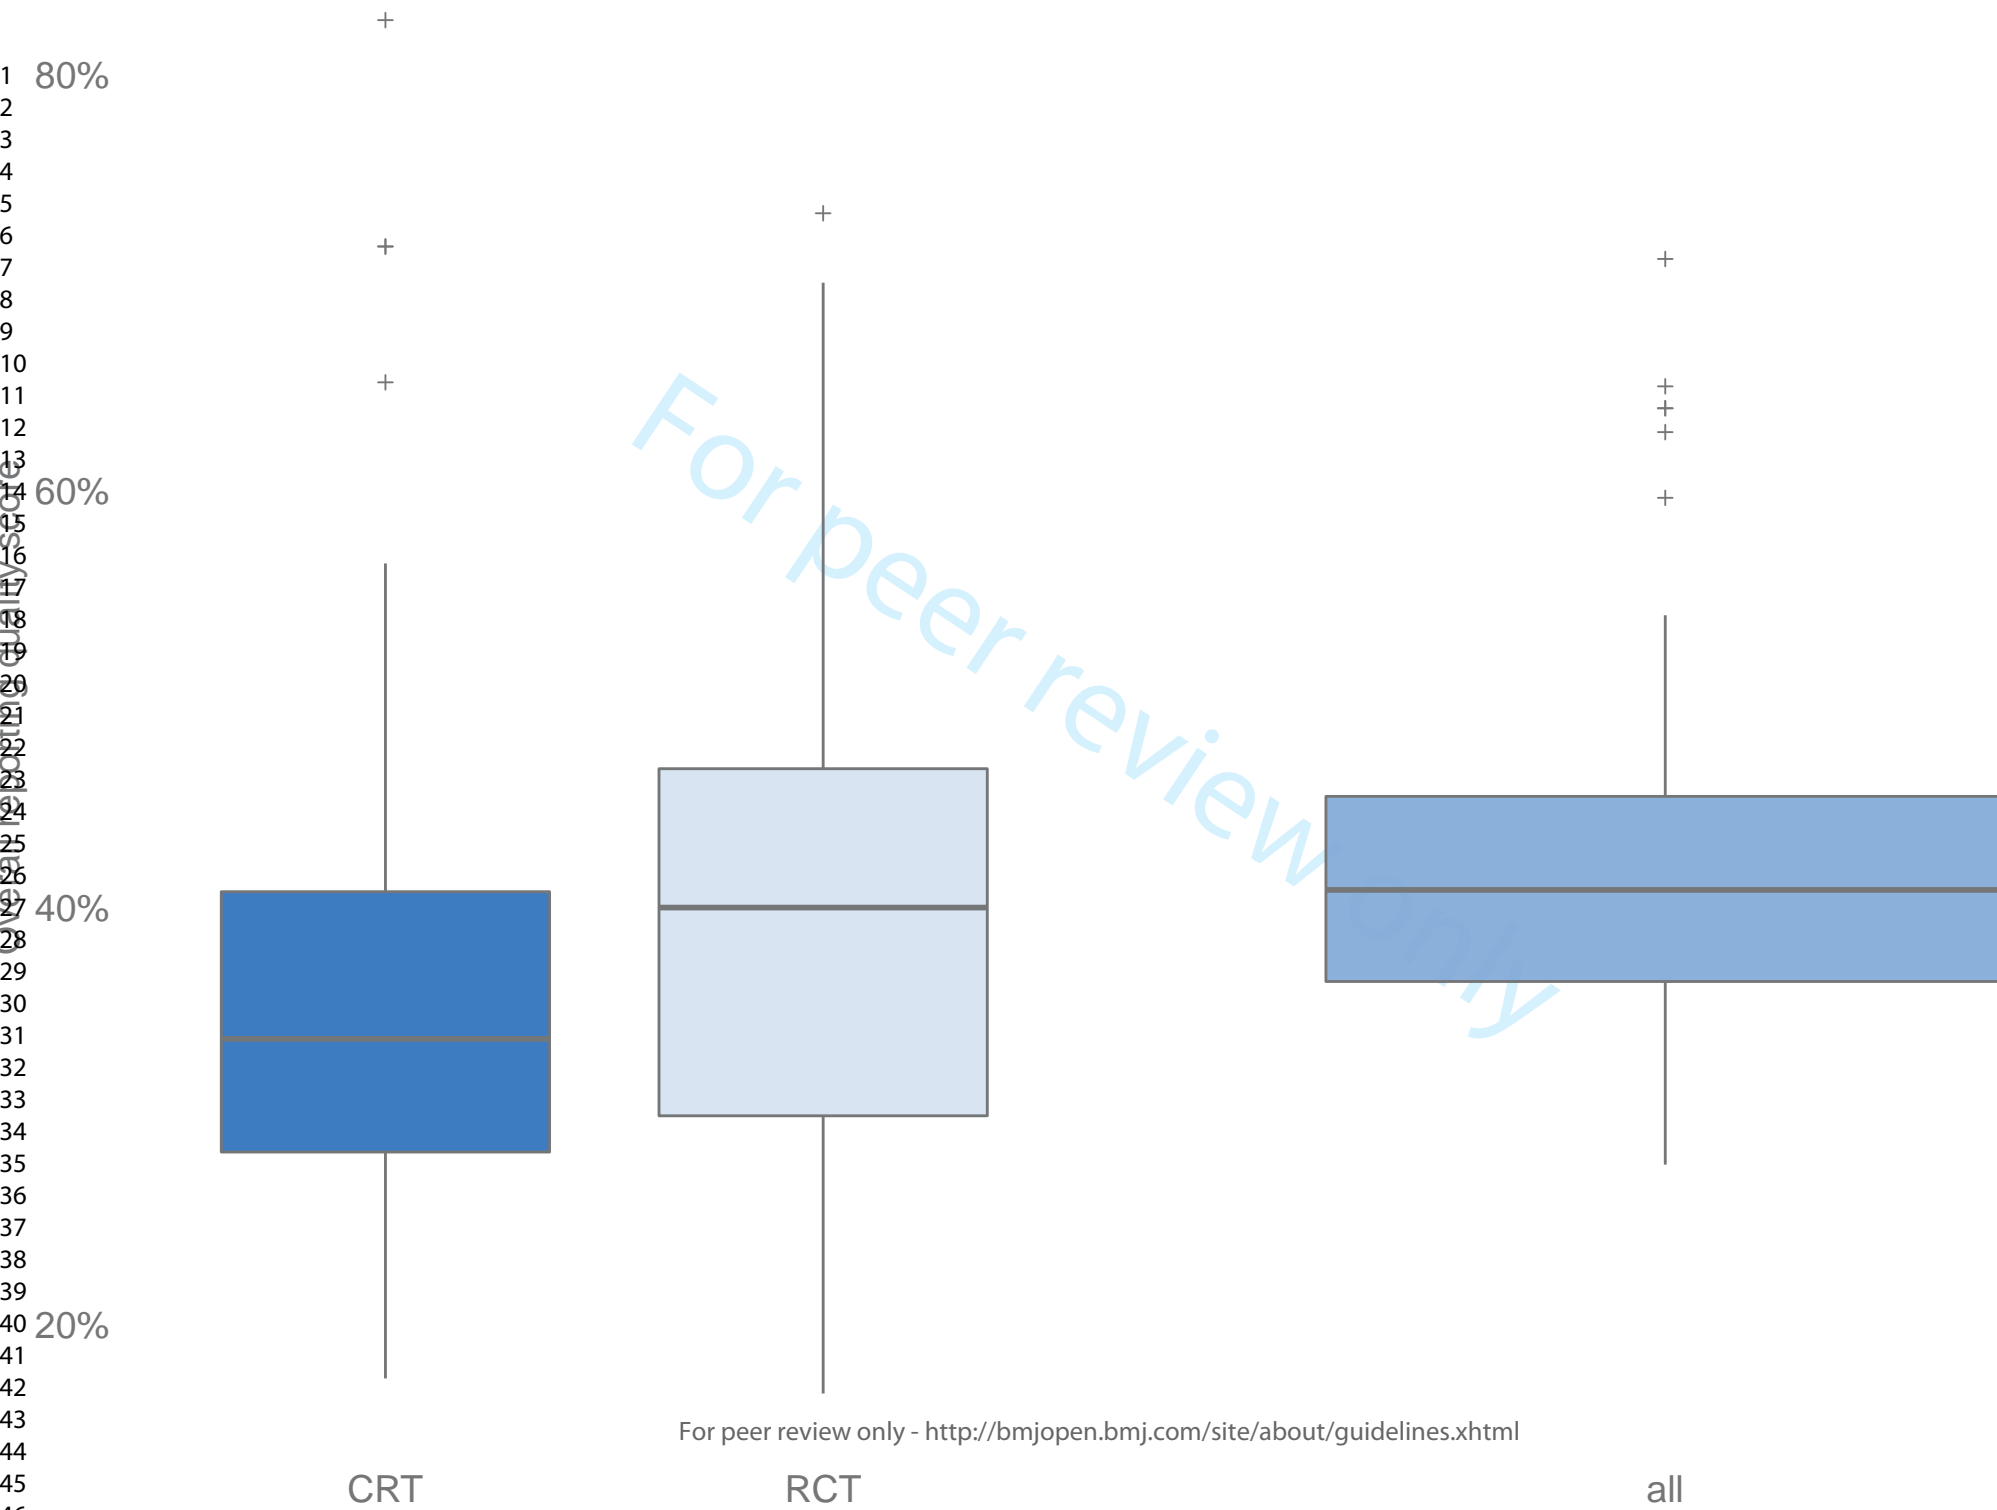

For peer review only - <http://bmjopen.bmj.com/site/about/guidelines.xhtml>

1  
2  
3  
4  
5  
6  
7  
8  
9  
10  
11  
12  
13  
14  
15  
16  
17  
18  
19  
20  
21  
22  
23  
24  
25  
26  
27  
28  
29  
30  
31  
32  
33  
34  
35  
36  
37  
38  
39  
40  
41  
42  
43  
44  
45  
46

CRT

RCT

all



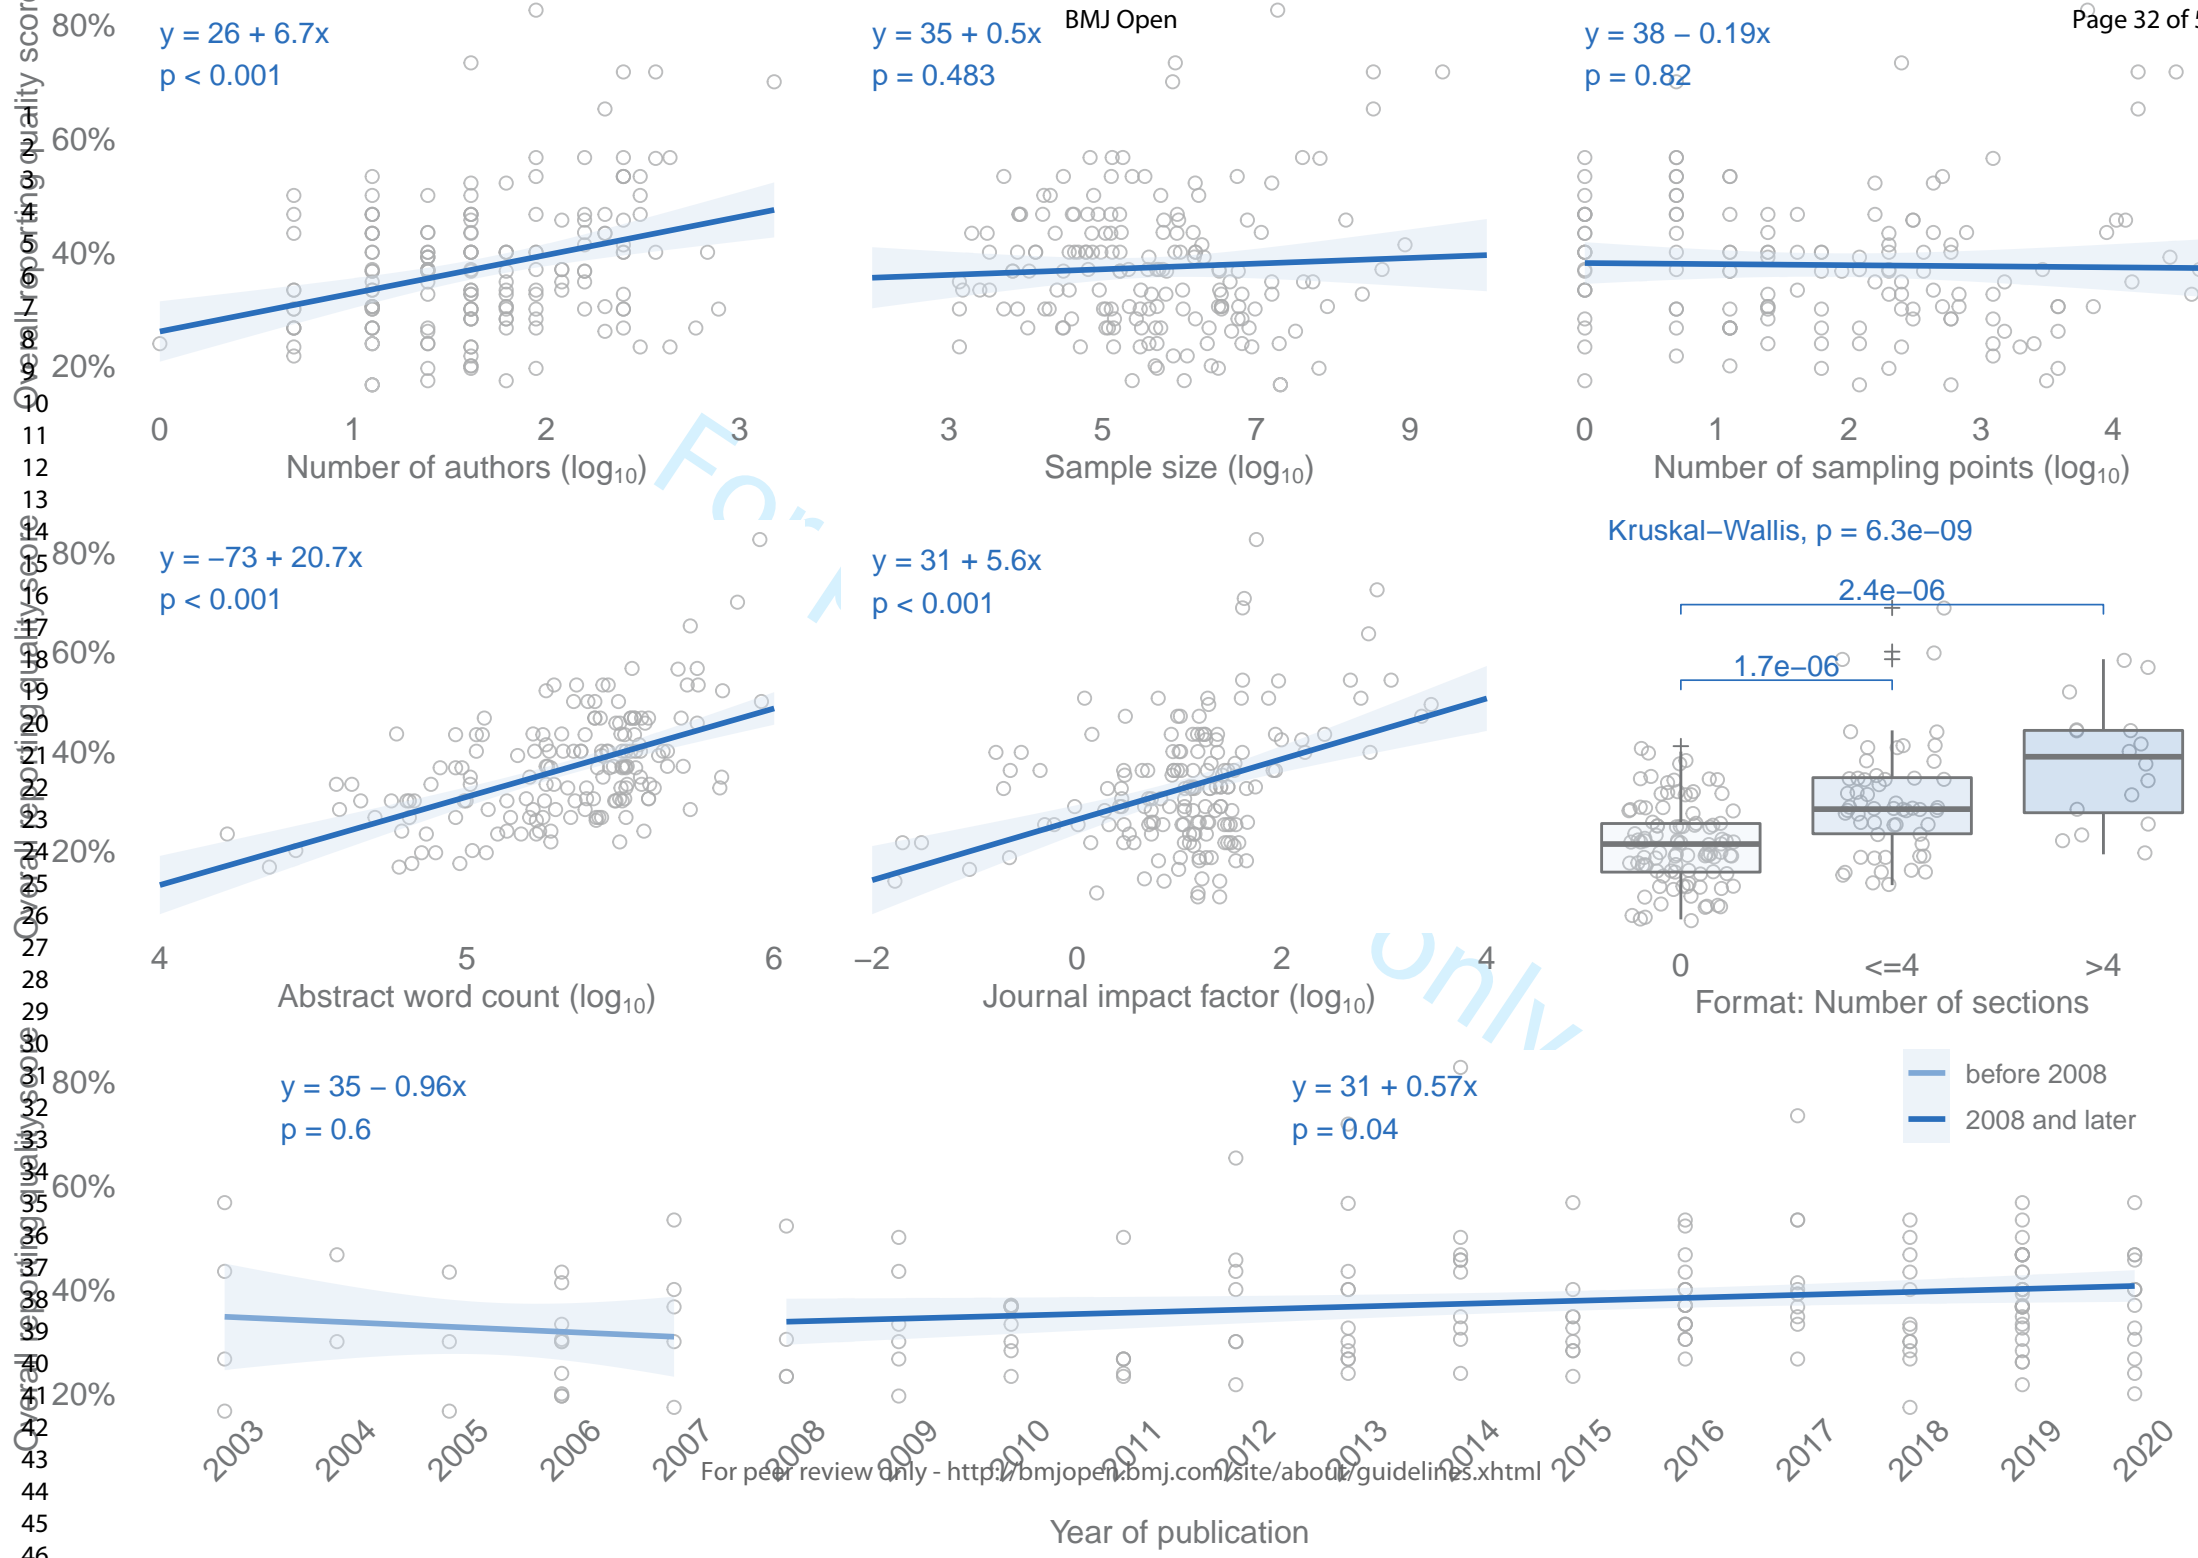

## Supplementary material

### S 1 Eligibility criteria for the study selection procedure.

|              | Inclusion criteria                                                                                                                                                                                                                                                                                                                                                                                                                                                   | Exclusion criteria                                                                                                                                                                                                                                                                                                                         |
|--------------|----------------------------------------------------------------------------------------------------------------------------------------------------------------------------------------------------------------------------------------------------------------------------------------------------------------------------------------------------------------------------------------------------------------------------------------------------------------------|--------------------------------------------------------------------------------------------------------------------------------------------------------------------------------------------------------------------------------------------------------------------------------------------------------------------------------------------|
| Population   | <ul style="list-style-type: none"> <li>• subjects are children or adolescents <math>\leq 18</math> years before treatment initiation (if age range is not available, then use mean age: <math>\leq 18.0</math> years)</li> <li>• clinical or community samples as well as samples drawn from the general population</li> <li>• participants with or without increased risk for depression</li> <li>• participants with or without subthreshold depression</li> </ul> | <ul style="list-style-type: none"> <li>• adult samples (<math>&gt; 18</math> years)</li> <li>• clinically depressed samples (<math>\geq 50\%</math> of participants currently meet or formerly met criteria for clinical diagnosis of depression before treatment initiation)</li> </ul>                                                   |
| Intervention | <ul style="list-style-type: none"> <li>• interventions aiming at preventing the onset of depression or reducing depressive symptoms (universal, selective, and indicated prevention)</li> <li>• social, psychological, or educational interventions targeting children and adolescents</li> </ul>                                                                                                                                                                    | <ul style="list-style-type: none"> <li>• interventions aiming at treating depression or preventing its reoccurrence (secondary or tertiary prevention)</li> <li>• interventions only targeting caregiver including any pharmacological and hormonal components or solely relying on music-based or physical activity components</li> </ul> |
| Control      | <ul style="list-style-type: none"> <li>• treatment as usual</li> <li>• wait-list control</li> <li>• attention placebo control</li> <li>• control arm with no treatment</li> </ul>                                                                                                                                                                                                                                                                                    | <ul style="list-style-type: none"> <li>• no control group</li> <li>• drug placebo</li> </ul>                                                                                                                                                                                                                                               |

## S1 Continued.

|              | Inclusion criteria                                                                                                                                                                                                                                                                                                                                                                                                                                                                                  | Exclusion criteria                                                                                                                                                                                                                                                                                                                                    |
|--------------|-----------------------------------------------------------------------------------------------------------------------------------------------------------------------------------------------------------------------------------------------------------------------------------------------------------------------------------------------------------------------------------------------------------------------------------------------------------------------------------------------------|-------------------------------------------------------------------------------------------------------------------------------------------------------------------------------------------------------------------------------------------------------------------------------------------------------------------------------------------------------|
| Outcome      | <ul style="list-style-type: none"> <li>outcome assessment before and after treatment initiation</li> <li>meeting diagnostic criteria for unipolar depressive disorder by administering fully structured or semi-structured diagnostic interviews or applying cut-off values on self- or proxy-report screening scales</li> <li>depressive symptom severity by administering fully structured or semi-structured diagnostic interviews or applying self- or proxy-report screening scales</li> </ul> | <ul style="list-style-type: none"> <li>bipolar depression, no depression, or depression only as secondary outcome</li> <li>only cost-effectiveness, process evaluation, surrogate outcome measures or multifactorial outcome index scores</li> </ul>                                                                                                  |
| Study design | <ul style="list-style-type: none"> <li>randomised controlled trials</li> <li>cluster randomised controlled trials</li> </ul>                                                                                                                                                                                                                                                                                                                                                                        | <ul style="list-style-type: none"> <li>meta-analysis</li> <li>systematic reviews</li> <li>narrative reviews/ overview articles</li> <li>observational studies</li> <li>qualitative studies</li> <li>non-controlled trials</li> <li>non-randomised trials</li> <li>quasi-randomised trials</li> <li>cross-over randomised controlled trials</li> </ul> |

## S 2 Electronic search strategy for MEDLINE via PubMed.

| Component                                      | ID  | Search term                                                                         |
|------------------------------------------------|-----|-------------------------------------------------------------------------------------|
| Search filter for the "children" component [1] | #1  | child*[tiab]                                                                        |
|                                                | #2  | adolescent[tiab]                                                                    |
|                                                | #3  | infan*[tiab]                                                                        |
|                                                | #4  | #1 OR #2 OR #3                                                                      |
| MeSH terms for "prevention" component          | #5  | "Mental Health Services"[mesh:noexp] AND Prevention and Control[sh:noexp]           |
|                                                | #6  | "Preventive Health Services"[mesh:noexp] AND Prevention and Control[sh:noexp]       |
|                                                | #7  | "Child Health Services"[mesh:noexp] AND Prevention and Control[sh:noexp]            |
|                                                | #8  | "Adolescent Health Services"[mesh:noexp] AND Prevention and Control[sh:noexp]       |
|                                                | #9  | "Community Mental Health Services"[mesh:noexp] AND Prevention and Control[sh:noexp] |
|                                                | #10 | "Preventive Medicine"[mesh:noexp] AND Prevention and Control[sh:noexp]              |
|                                                | #11 | "Early Intervention (Education)"[mesh:noexp] AND Prevention and Control[sh:noexp]   |
|                                                | #12 | "Health Education"[mesh:noexp] AND Prevention and Control[sh:noexp]                 |
|                                                | #13 | "Health Promotion"[mesh:noexp] AND Prevention and Control[sh:noexp]                 |
|                                                | #14 | "Family Therapy"[mesh:noexp] AND Prevention and Control[sh:noexp]                   |
|                                                | #15 | "Psychotherapy, Group"[mesh:noexp] AND Prevention and Control[sh:noexp]             |
|                                                | #16 | "School Health Services"[mesh:noexp] AND Prevention and Control[sh:noexp]           |
|                                                | #17 | #5 OR #6 OR #7 OR #8 OR #9 OR #10 OR #11 OR #12 OR #13 OR #14 OR #15 OR #16         |

Wiehn et al.

S 2 Continued.

| Component                                          | ID                       | Search term                                                                                   |
|----------------------------------------------------|--------------------------|-----------------------------------------------------------------------------------------------|
| Keywords for "prevention" component                | #18                      | primary[tiab]                                                                                 |
|                                                    | #19                      | targeted[tiab]                                                                                |
|                                                    | #20                      | universal[tiab]                                                                               |
|                                                    | #21                      | selective[tiab]                                                                               |
|                                                    | #22                      | selected[tiab]                                                                                |
|                                                    | #23                      | indicated[tiab]                                                                               |
|                                                    | #24                      | psycho*[tiab]                                                                                 |
|                                                    | #25                      | educat*[tiab]                                                                                 |
|                                                    | #26                      | social[tiab]                                                                                  |
|                                                    | #27                      | #18 OR #19 OR #20 OR #21 OR #22 OR #23 OR #24 OR #25 OR #26                                   |
|                                                    | #28                      | prevent*[tiab]                                                                                |
|                                                    | #29                      | intervention*[tiab]                                                                           |
|                                                    | #30                      | program*[tiab]                                                                                |
| #31                                                | promot*[tiab]            |                                                                                               |
| #32                                                | #28 OR #29 OR #30 OR #31 |                                                                                               |
| #33                                                | #27 AND #32              |                                                                                               |
| Keywords and MeSH terms for "prevention" component | #34                      | #17 OR #33                                                                                    |
| MeSH terms for "depression" component              | #35                      | "Depression"[mesh:noexp] AND (Epidemiology[sh:noexp] OR Psychology[sh:noexp])                 |
|                                                    | #36                      | "Depressive Disorder"[mesh:noexp] AND (Epidemiology[sh:noexp] OR Psychology[sh:noexp])        |
|                                                    | #37                      | "Depressive Disorder, Major"[mesh:noexp] AND (Epidemiology[sh:noexp] OR Psychology[sh:noexp]) |
|                                                    | #38                      | "Dysthymic Disorder"[mesh:noexp] AND (Epidemiology[sh:noexp] OR Psychology[sh:noexp])         |
|                                                    | #39                      | "Depression, Postpartum"[mesh:noexp] AND (Epidemiology[sh:noexp] OR Psychology[sh:noexp])     |
|                                                    | #40                      | #35 OR #36 OR #37 OR #38 OR #39                                                               |
| Keyword for "depression" component                 | #41                      | depress*[tiab]                                                                                |
| MeSH terms and keywords for "depression" component | #42                      | #40 OR #41                                                                                    |

## S 2 Continued.

| Component                                                          | ID  | Search term                                                                                         |
|--------------------------------------------------------------------|-----|-----------------------------------------------------------------------------------------------------|
| MeSH terms for "study design" component                            | #43 | "Controlled Clinical Trials as Topic"[mesh:noexp] AND (Methods[sh:noexp] OR Epidemiology[sh:noexp]) |
|                                                                    | #44 | exp "Randomized Controlled Trial"[Publication Type]                                                 |
|                                                                    | #45 | #43 OR #44                                                                                          |
| Keywords for "study design" component                              | #46 | random*[tiab]                                                                                       |
|                                                                    | #47 | trial[tiab]                                                                                         |
|                                                                    | #48 | #46 OR #47                                                                                          |
| MeSH terms and keywords for "study design" component               | #49 | #45 OR #48                                                                                          |
| Exclude animal-related research                                    | #50 | exp "Animals"[mesh]                                                                                 |
|                                                                    | #51 | exp "Humans"[mesh]                                                                                  |
|                                                                    | #52 | #50 NOT #51                                                                                         |
|                                                                    | #53 | #49 NOT #52                                                                                         |
| Exclude reviews, meta-analyses and research protocols              | #54 | Review [Publication Type]                                                                           |
|                                                                    | #55 | "Review Literature as Topic"[mesh:noexp]                                                            |
|                                                                    | #56 | #54 OR #55                                                                                          |
|                                                                    | #57 | meta analysis[ti]                                                                                   |
|                                                                    | #58 | review[ti]                                                                                          |
|                                                                    | #59 | protocol[ti]                                                                                        |
|                                                                    | #60 | #57 OR #58 OR #59                                                                                   |
| Components: "child" + "prevention"                                 | #61 | #56 OR #60                                                                                          |
|                                                                    | #62 | #53 NOT #61                                                                                         |
| Components: "child" + "prevention" + "depression"                  | #63 | #4 AND #34                                                                                          |
| Components: "child" + "prevention" + "depression"                  | #64 | #63 AND #42                                                                                         |
| Components: "child" + "prevention" + "depression" + "study design" | #65 | #64 AND #62                                                                                         |
| Restrict to records published between 2003 and 2019                | #66 | #65 AND 2003:2019[dp]                                                                               |

S3 Hand-searched journals and systematic reviews as additional sources of information.

Journals hand-searched for eligible primary studies

Journal of the American Academy of Child & Adolescent Psychiatry

Journal of Abnormal Child Psychology

Journal of Paediatric Psychology

Behaviour Research and Therapy

Systematic reviews for which the reference lists were searched for eligible primary studies

Ahlen, J., Lenhard, F., & Ghaderi, A. (2015). Universal prevention for anxiety and depressive symptoms in children: a meta-analysis of randomized and cluster-randomized trials. *The journal of primary prevention*, 36(6), 387-403.

Barry, M. M., Clarke, A. M., Jenkins, R., & Patel, V. (2013). A systematic review of the effectiveness of mental health promotion interventions for young people in low- and middle-income countries. *BMC public health*, 13(1), 835.

Bastounis, A., Callaghan, P., Banerjee, A., & Michail, M. (2016). The effectiveness of the Penn Resiliency Programme (PRP) and its adapted versions in reducing depression and anxiety and improving explanatory style: A systematic review and meta-analysis. *Journal of adolescence*, 52, 37-48.

Brunwasser, S. M., & Garber, J. (2016). Programs for the prevention of youth depression: Evaluation of efficacy, effectiveness, and readiness for dissemination. *Journal of Clinical Child & Adolescent Psychology*, 45(6), 763-783.

Brunwasser, S. M., Gillham, J. E., & Kim, E. S. (2009). A meta-analytic review of the Penn Resiliency Program's effect on depressive symptoms. *Journal of consulting and clinical psychology*, 77(6), 1042-1054.

Calear, A. L., & Christensen, H. (2010). Review of internet-based prevention and treatment programs for anxiety and depression in children and adolescents. *Medical Journal of Australia*, 192(11), S12.

Calear, A. L., & Christensen, H. (2010). Systematic review of school-based prevention and early intervention programs for depression. *Journal of adolescence*, 33(3), 429-438.

Cary, C. E., & McMillen, J. C. (2012). The data behind the dissemination: A systematic review of trauma-focused cognitive behavioral therapy for use with children and youth. *Children and Youth Services Review*, 34(4), 748-757.

Christensen, H., Pallister, E., Smale, S., Hickie, I. B. & Calear, A. L. (2010). Community-based prevention programs for anxiety and depression in youth: A systematic review. *Journal of Primary Prevention*, 31, 139-170.

Corrieri, S., Heider, D., Conrad, I., Blume, A., König, H. H., & Riedel-Heller, S. G. (2013). School-based prevention programs for depression and anxiety in adolescence: A systematic review. *Health promotion international*, 29(3), 427-441.

Cuijpers, P., van Straten, A., Smit, F., Mihalopoulos, C., & Beekman, A. (2008). Preventing the onset of depressive disorders: a meta-analytic review of psychological interventions. *American Journal of Psychiatry*, 165(10), 1272-1280.

Dardas, L. A., van de Water, B., & Simmons, L. A. (2017). Parental involvement in adolescent depression interventions: A systematic review of randomized clinical trials. *International journal of mental health nursing*, 27(2), 555-570.

Dray, J., Bowman, J., Campbell, E., Freund, M., Wolfenden, L., Hodder, R. K., ... & Small, T. (2017). Systematic review of universal resilience-focused interventions targeting child and adolescent mental health in the school setting. *Journal of the American Academy of Child & Adolescent Psychiatry*, 56(10), 813-824.

Ebert, D. D., Zarski, A. C., Christensen, H., Stikkelbroek, Y., Cuijpers, P., Berking, M., & Riper, H. (2015). Internet and computer-based cognitive behavioral therapy for anxiety and depression in youth: a meta-analysis of randomized controlled outcome trials. *PLOS ONE*, 10(3), e0119895.

Erford, B. T., Erford, B. M., Lattanzi, G., Weller, J., Schein, H., Wolf, E., ... & Peacock, E. (2011). Counseling outcomes from 1990 to 2008 for school-age youth with depression: A meta-analysis. *Journal of Counseling & Development*, 89(4), 439-457.

S3 Continued.

Systematic reviews for which the reference lists were searched for eligible primary studies

- Garber, J., Brunwasser, S. M., Zerr, A. A., Schwartz, K. T., Sova, K., & Weersing, V. R. (2016). Treatment and Prevention of Depression and Anxiety in Youth: Test of Cross-Over Effects. *Depression and anxiety*, 33(10), 939-959.
- Grist, R., Porter, J., & Stallard, P. (2017). Mental health mobile apps for preadolescents and adolescents: a systematic review. *Journal of medical internet research*, 19(5), e176.
- Grist, R., Croker, A., Denne, M., & Stallard, P. (2018). Technology Delivered Interventions for Depression and Anxiety in Children and Adolescents: A Systematic Review and Meta-analysis. *Clinical Child and Family Psychology Review*, 22(2), 147-171.
- Hetrick, S., Cox, G., & Merry, S. (2015). Where to go from here? An exploratory meta-analysis of the most promising approaches to depression prevention programs for children and adolescents. *International journal of environmental research and public health*, 12(5), 4758-4795.
- Hetrick, S. E., Cox, G. R., Witt, K. G., Bir, J. J., & Merry, S. N. (2016). Cognitive behavioural therapy (CBT), third-wave CBT and interpersonal therapy (IPT) based interventions for preventing depression in children and adolescents. *Cochrane Database of Systematic Reviews*, (8).
- Merry, S. N., Hetrick, S. E., Cox, G. R., Brudevold-Iversen, T., Bir, J. J., & McDowell, H. (2012). Psychological and educational interventions for preventing depression in children and adolescents. Evidence-Based Child Health: *A Cochrane Review Journal*, 7(5), 1409-1685.
- Merry, S. N. & Spence, S. H. (2007). Attempting to prevent depression in youth: A systematic review of the evidence. *Early Intervention in Psychiatry*, 1, 128-137.
- Neil, A. L., & Christensen, H. (2007). Australian school-based prevention and early intervention programs for anxiety and depression: a systematic review. *Medical Journal of Australia*, 186(6), 305.
- Richardson, T., Stallard, P., & Velleman, S. (2010). Computerised cognitive behavioural therapy for the prevention and treatment of depression and anxiety in children and adolescents: a systematic review. *Clinical child and family psychology review*, 13(3), 275-290.
- Stice, E., Shaw, H., Bohon, C., Marti, C. N., & Rohde, P. (2009). A meta-analytic review of depression prevention programs for children and adolescents: factors that predict magnitude of intervention effects. *Journal of consulting and clinical psychology*, 77(3), 486.
- Stockings, E. A., Degenhardt, L., Dobbins, T., Lee, Y. Y., Erskine, H. E., Whiteford, H. A., & Patton, G. (2016). Preventing depression and anxiety in young people: a review of the joint efficacy of universal, selective, and indicated prevention. *Psychological medicine*, 46(1), 11-26.
- Werner-Seidler, A., Perry, Y., Calcar, A. L., Newby, J. M., & Christensen, H. (2017). School-based depression and anxiety prevention programs for young people: A systematic review and meta-analysis. *Clinical psychology review*, 51, 30-47.



Wiehn et al.

S4 Pre-specified characteristics for the analysis based on previous studies on associations with reporting quality.

| Characteristic            | Previous studies reporting on associations with reporting quality                                                                                                                                                                                                                              |
|---------------------------|------------------------------------------------------------------------------------------------------------------------------------------------------------------------------------------------------------------------------------------------------------------------------------------------|
| Number of authors         | Bigna (2016) [2]<br>Chen (2018) [3]<br>Fang (2020) [9]<br>Fleming (2012) [10]<br>Guo (2014) [4]<br>Hua (2015) [5]<br>Jin (2016) [11]<br>Kiriakou (2014) [6]<br>Menne (2021) [7]<br>Seehra (2013) [12]<br>Song (2017) [13]<br>Wang (2021) [8]<br>Zhang (2021) [14]                              |
| Sample size               | Baulig (2018) [15]<br>Chen (2018) [3]<br>Fang et al. (2020)<br>Jin (2016) [11]<br>Mbuagbaw (2014) [16]<br>Song (2017) [13]<br>Sriganesh (2017) [17]<br>Wang (2021) [8]                                                                                                                         |
| Number of sampling points | Chen (2018) [3]<br>Fang (2020) [9]<br>Fleming (2012) [10]<br>Guo (2014) [4]<br>Hua (2015) [5]<br>Jin (2016) [11]<br>Kiriakou (2014) [6]<br>Mbuagbaw (2014) [16]<br>Menne (2021) [7]<br>Seehra (2013) [12]<br>Song (2017) [13]<br>Sriganesh (2017) [17]<br>Wang (2021) [8]<br>Zhang (2021) [14] |
| Abstract word count       | Baulig (2018) [15]<br>Chen (2018) [3]<br>Fang et al. (2020)<br>Guo (2014) [4]<br>Hua (2015) [5]<br>Jin (2016) [11]<br>Knippschild (2021) [18]<br>Menne (2021) [7]<br>Wang (2021) [8]                                                                                                           |

S4 Continued.

| Characteristic        | Previous studies reporting on associations with reporting quality                                                                                                                                                                                                                                                                                                  |
|-----------------------|--------------------------------------------------------------------------------------------------------------------------------------------------------------------------------------------------------------------------------------------------------------------------------------------------------------------------------------------------------------------|
| Journal impact factor | Baulig (2018) [15]<br>Bigna (2016) [2]<br>Chen (2018) [3]<br>Cui (2014) [19]<br>Guo (2014) [4]<br>Hua (2015) [5]<br>Knippschild (2021) [18]<br>Menne (2021) [7]<br>Song (2017) [13]<br>Wang (2021) [8]<br>Zhang (2021) [14]                                                                                                                                        |
| Abstract format       | Bigna (2016) [2]<br>Chen (2018) [3]<br>Fang (2020) [9]<br>Fleming (2012) [10]<br>Guo (2014) [4]<br>Hua (2015) [5]<br>Jin (2016) [11]<br>Knippschild (2021) [18]<br>Menne (2021) [7]<br>Song (2017) [13]<br>Wang (2021) [8]<br>Zhang (2021) [14]                                                                                                                    |
| Year of publication   | Baulig (2018) [15]<br>Bigna (2016) [2]<br>Can (2011) [20]<br>Chen (2018) [3]<br>Chow (2018) [21]<br>Cui (2014) [19]<br>Guo (2014) [4]<br>Hua (2015) [5]<br>Jin (2016) [11]<br>Knippschild (2021) [18]<br>Mbuagbaw (2014) [16]<br>Menne (2021) [7]<br>Sivendran (2015) [22]<br>Song (2017) [13]<br>Speich (2019) [23]<br>Sriganesh (2017) [17]<br>Zhang (2021) [14] |

Wiehn et al.

S5 Variables extracted during the data collection process according to S4.

| Variable                  | Definition                                                                                                                                                                                               | Source                                            |
|---------------------------|----------------------------------------------------------------------------------------------------------------------------------------------------------------------------------------------------------|---------------------------------------------------|
| Number of authors         | The number of authors who have published the trial report.                                                                                                                                               | First page of the trial report                    |
| Sample size               | The number of subjects in all study arms.                                                                                                                                                                | Methods of the manuscript                         |
| Number of sampling points | The number of sampling points in all study arms.                                                                                                                                                         | Methods of the manuscript                         |
| Abstract word count       | The number of words used only for the abstract, excluding keywords, author information and such.                                                                                                         | Abstract of the trial report                      |
| Journal impact factor     | The journal impact factor calculated from data indexed in the Web of Science Core Collection. If data was missing for a certain year, the journal impact factor from the latest year available was used. | Journal Citation Reports as provided by Clarivate |
| Abstract format           | The number of sections used to structure the abstract. Following Hua et al., abstracts were categorized as unstructured (1 section), structured (2-4 sections) or highly structured (>4 sections).[24]   | Abstract of the trial report                      |
| Year of publication       | The year in which the trial report was first published.                                                                                                                                                  | First page of the trial report                    |

S6 Boxplots visualizing the distribution of continuous variables possibly related to overall reporting quality.



Wiehn et al.

S7 Interrater-reliability (Cohen's Kappa) and adequate reporting (proportion of trial abstracts) in 169 abstracts assessed according to CONSORT-A and CONSORT-C checklist items.

| Item              | Extension for cluster trials * | Description                                                                                       | Cohen's kappa |               |                 | Proportion of trial abstract that reported... |              |            |
|-------------------|--------------------------------|---------------------------------------------------------------------------------------------------|---------------|---------------|-----------------|-----------------------------------------------|--------------|------------|
|                   |                                |                                                                                                   | unweighted    | equal weights | squared weights | adequately                                    | inadequately | not at all |
| General items     |                                |                                                                                                   |               |               |                 |                                               |              |            |
| 01 Title          | No                             | a) Identification of the study as randomized                                                      | .96           | .96           | .96             | 58.0                                          | -            | 42.0       |
|                   | Yes                            | b) Identification of study as cluster randomized                                                  | 1             |               | 1               | 31.8                                          | -            | 68.2       |
| 02 Trial design   | No                             | Description of the trial design (e.g. parallel, cluster, non-inferiority)                         | .38           | .45           | .53             | 30.2                                          | 66.3         | 3.6        |
| Trial Methodology |                                |                                                                                                   |               |               |                 |                                               |              |            |
| 03 Participants   | No                             | a) Eligibility criteria for participants <u>and</u> the settings where the data were collected ** |               |               |                 | 35.5                                          | 62.1         | 2.4        |
|                   |                                | (i) The authors report eligibility criteria for participants                                      | .77           | .78           | .80             | 80.5                                          | 17.2         | 2.4        |
|                   |                                | (ii) The authors report eligibility criteria for setting                                          | .81           | .85           | .89             | 35.5                                          | 30.2         | 34.3       |
|                   | Yes                            | b) Eligibility criteria for clusters                                                              | .80           |               | .79             | 47.0                                          | 30.3         | 22.7       |
| 04 Interventions  | No                             | Interventions intended for each group **                                                          |               |               |                 | 30.8                                          | 68.0         | 1.2        |
|                   |                                | (i) Authors report essential features of the experimental intervention                            | .80           | .81           | .82             | 52.7                                          | 45.6         | 1.8        |
|                   |                                | (ii) Authors report essential features of the comparison intervention                             | .76           | .82           | .86             | 47.9                                          | 21.3         | 30.8       |

S7 Continued.

| Item              | Extension for cluster trials * | Description                                                                                                                | Cohen's kappa |               |                 | Proportion of trial abstract that reported... |              |            |
|-------------------|--------------------------------|----------------------------------------------------------------------------------------------------------------------------|---------------|---------------|-----------------|-----------------------------------------------|--------------|------------|
|                   |                                |                                                                                                                            | unweighted    | equal weights | squared weights | adequately                                    | inadequately | not at all |
| Trial Methodology |                                |                                                                                                                            |               |               |                 |                                               |              |            |
| 05 Objective      | No                             | (a) Specific objective <u>or</u> hypothesis                                                                                | .73           | .74           | .76             | 89.9                                          | 8.3          | 1.8        |
|                   | Yes                            | (b) Whether objective <u>or</u> hypothesis pertains to the cluster level, the individual participant level, <u>or</u> both | .66           |               | .89             | 1.5                                           | -            | 98.5       |
| 06 Outcome        | No                             | (a) Clearly defined primary outcome for this report **                                                                     |               |               |                 | 10.1                                          | 89.9         | -          |
|                   |                                | (i) Authors explicitly state the primary outcome                                                                           | .91           | .91           | .91             | 14.8                                          | 84.6         | 0.6        |
|                   |                                | (ii) Authors explicitly state when the primary outcome was assessed                                                        | .69           | .78           | .84             | 51.5                                          | 23.1         | 25.4       |
|                   | Yes                            | (b) Whether the primary outcome pertains to the cluster level, the individual participant level <u>or</u> both             | .56           |               | .61             | 3.0                                           | 3.0          | 93.9       |
| 07 Randomization  | No                             | (a) How participants were allocated to interventions                                                                       | .49           | .59           | .66             | 2.4                                           | -            | 97.6       |
|                   | Yes                            | (b) How clusters were allocated to interventions                                                                           | .88           |               | .88             | 6.1                                           | -            | 93.9       |

Wiehn et al.

S7 Continued.

| Item                  | Extension for cluster trials * | Description                                                                                                           | Cohen's kappa |               |                 | Proportion of trial abstract that reported... |              |            |
|-----------------------|--------------------------------|-----------------------------------------------------------------------------------------------------------------------|---------------|---------------|-----------------|-----------------------------------------------|--------------|------------|
|                       |                                |                                                                                                                       | unweighted    | equal weights | squared weights | adequately                                    | inadequately | not at all |
| Trial Methodology     |                                |                                                                                                                       |               |               |                 |                                               |              |            |
| 08 Blinding (masking) | No                             | Whether or not participants, care givers, <u>and</u> those assessing the outcomes were blinded to group assignment ** |               |               |                 | -                                             | 3.6          | 96.4       |
|                       |                                | (i) Authors describe if participants were blinded                                                                     | .77           | .85           | .92             | 1.2                                           | 1.8          | 97.0       |
|                       |                                | (ii) Authors describe if program deliverer were blinded                                                               | .77           | .85           | .92             | 1.2                                           | 1.8          | 97.0       |
|                       |                                | (iii) Authors describe if data collectors/analysts were blinded                                                       | .66           | .66           | .66             | 0.6                                           | 1.8          | 97.6       |
| Trial results         |                                |                                                                                                                       |               |               |                 |                                               |              |            |
| 09 Numbers randomized | No                             | (a) Number of participants randomized to each group                                                                   | .95           | .97           | .98             | 32.0                                          | 1.8          | 66.3       |
|                       | Yes                            | (b) Number of clusters randomized to each group                                                                       | .76           |               | .78             | 13.6                                          | 1.5          | 84.8       |
| 10 Numbers analyzed   | No                             | (a) Number of participants analyzed in each group                                                                     | .88           | .93           | .96             | 3.6                                           | 2.4          | 94.1       |
|                       | Yes                            | (b) Number of clusters analyzed in each group                                                                         | 1             |               | 1               | 1.5                                           | -            | 98.5       |

S7 Continued.

| Item                  | Extension for cluster trials * | Description                                                                                          | Cohen's kappa |               |                 | Proportion of trial abstract that reported... |              |            |
|-----------------------|--------------------------------|------------------------------------------------------------------------------------------------------|---------------|---------------|-----------------|-----------------------------------------------|--------------|------------|
|                       |                                |                                                                                                      | unweighted    | equal weights | squared weights | adequately                                    | inadequately | not at all |
| Trial results         |                                |                                                                                                      |               |               |                 |                                               |              |            |
| 11 Outcome            | No                             | (a) For the primary outcome, a result for each group and the estimated effect size and its precision | .94           | .94           | .94             | 27.2                                          | 72.8         | -          |
|                       | Yes                            | (b) Results at the cluster or individual level as applicable for each primary outcome                | .96           |               | .96             | 28.8                                          | 71.2         | -          |
| 12 Harms              | No                             | Important adverse events or side effects                                                             | 0***          | 0***          | 0***            | 0.6                                           | -            | 99.4       |
| 13 Conclusions        | No                             | General interpretation of the results **                                                             |               |               |                 | 36.7                                          | 47.3         | 16.0       |
|                       |                                | (i) Authors state the conclusions of the trial                                                       | .75           | .79           | .82             | 71.0                                          | 1.8          | 27.2       |
|                       |                                | (ii) Authors state implications for further research or clinical practice                            | .74           | .78           | .81             | 46.2                                          | 8.3          | 45.6       |
| 14 Trial registration | No                             | Registration number and name of trial register **                                                    |               |               |                 | 17.2                                          | 3.0          | 79.9       |
|                       |                                | (i) Authors provide details on the trial registration number                                         | 1             | 1             | 1               | 20.1                                          | -            | 79.9       |
|                       |                                | (ii) Authors provide details on the name of the trial register                                       | .98           | .98           | .98             | 17.2                                          | 0.6          | 82.2       |
| 15 Funding            | No                             | Source of funding                                                                                    | .88           | .89           | .95             | 11.8                                          | 0.6          | 87.6       |

Comments: Items corresponding to author contact information and trial status were not assessed because these items are specific to conference abstracts that were excluded from this study. Because journals often have their own standards for positioning funding information, we rated funding as adequately reported if it was reported in the abstract or in a section other than the abstract (e.g., at the end of the article). Due to rounding errors, the percentages may not add up.



Wiehn et al.

---

1  
2  
3 \* Studies that randomized their intervention on the cluster level were assessed for adherence to CONSORT-A and CONSORT-C (N = 66). Studies that randomized on the individual level were evaluated  
4 for adherence to CONSORT-A, only (N = 103). As a result, all 169 reports were assessed for CONSORT-A, but only 66 cluster randomized trial reports were additionally checked for CONSORT-C.  
5

6 \*\* For those items where multiple dimensions are required, we operationalized each dimension separately. Subsequently we merged these dimensions into summary variables. If all dimensions were reported  
7 adequately, the summary variable was reported adequately. If at least one dimension was reported inadequately, the summary variable was reported inadequately. If all dimensions were not reported, the  
8 summary variable was not reported.  
9

10 \*\*\* The agreement of the CONSORT items Harms was almost identical. Kappa is nevertheless equal to zero. The correction factor of the kappa formula is responsible for this paradox. The factor corrects  
11 for random agreement between raters. If the proportion of observed agreement is high, it can lower the kappa values toward zero. For further explanation and examples, see Feinstein and Cicchetti. [25]  
12  
13  
14  
15  
16  
17  
18  
19  
20  
21  
22  
23  
24  
25  
26  
27  
28  
29  
30  
31  
32  
33  
34  
35  
36  
37  
38  
39  
40  
41  
42

S8 Annual number of included trial reports by study design between January 2003 and August 2020 (N= 169).

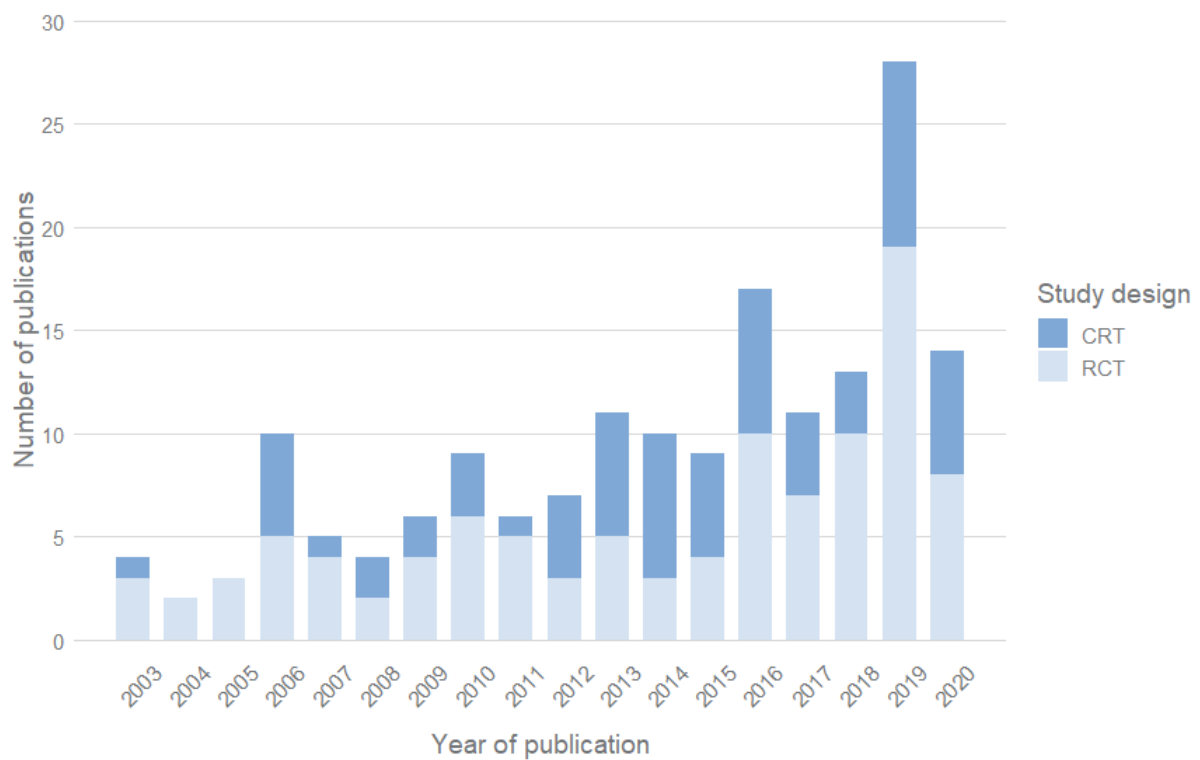

## REFERENCES

- 1 Kastner M, Wilczynski NL, Walker-Dilks C, et al. Age-specific search strategies for Medline. *J Med Internet Res* 2006;8(4):e25. doi:10.2196/jmir.8.4.e25 [published Online First: 25 October 2006].
- 2 Bigna JJR, Noubiap JJN, Asangbeh SL, et al. Abstracts reporting of HIV/AIDS randomized controlled trials in general medicine and infectious diseases journals: completeness to date and improvement in the quality since CONSORT extension for abstracts. *BMC Med Res Methodol* 2016;16(1):138. doi:10.1186/s12874-016-0243-y [published Online First: 13 October 2016].
- 3 Chen J, Li Z, Liu B, et al. Quality improvement in randomized controlled trial abstracts in prosthodontics since the publication of CONSORT guideline for abstracts: a systematic review. *J Dent* 2018:23–29. doi:10.1016/j.jdent.2018.04.025 [published Online First: 6 May 2018].
- 4 Guo J-W, Iribarren SJ. Reporting quality for abstracts of randomized controlled trials in cancer nursing research. *Cancer Nurs* 2014;37(6):436–44.
- 5 Hua F, Deng L, Kau CH, et al. Reporting quality of randomized controlled trial abstracts. *The Journal of the American Dental Association* 2015;146(9):669-678.e1.
- 6 Kiriakou J, Pandis N, Madianos P, et al. Assessing the reporting quality in abstracts of randomized controlled trials in leading journals of oral implantology. *J Evid Based Dent Pract* 2014;14(1):9–15. doi:10.1016/j.jebdp.2013.10.018 [published Online First: 19 December 2013].
- 7 Menne MC, Pandis N, Faggion CM. Reporting quality of abstracts of randomized controlled trials related to implant dentistry. *J Periodontol* 2021.
- 8 Wang D, Chen L, Wang L, et al. Abstracts for reports of randomized trials of COVID-19 interventions had low quality and high spin. *J Clin Epidemiol* 2021;139:107–20.
- 9 Fang X, Hua F, Riley P, et al. Abstracts of published randomized controlled trials in Endodontics: reporting quality and spin. *Int Endod J* 2020;53(8):1050–61.
- 10 Fleming PS, Buckley N, Seehra J, et al. Reporting quality of abstracts of randomized controlled trials published in leading orthodontic journals from 2006 to 2011. *Am J Orthod Dentofacial Orthop* 2012;142(4):451–58.
- 11 Jin L, Hua F, Cao Q. Reporting quality of randomized controlled trial abstracts published in leading laser medicine journals: an assessment using the CONSORT for abstracts guidelines. *Lasers Med Sci* 2016;31(8):1583–90. doi:10.1007/s10103-016-2018-4 [published Online First: 30 June 2016].
- 12 Seehra J, Wright NS, Polychronopoulou A, et al. Reporting quality of abstracts of randomized controlled trials published in dental specialty journals. *J Evid Based Dent Pract* 2013;13(1):1–8.

- 1  
2  
3 13 Song SY, Kim B, Kim I, et al. Assessing reporting quality of randomized controlled trial  
4 abstracts in psychiatry: Adherence to CONSORT for abstracts: A systematic review.  
5 *PLoS One* 2017;12(11):e0187807.  
6  
7  
8 14 Zhang J, RN WS, Ying Y, et al. Abstracts Reporting of Randomized Controlled Trials in  
9 Ten Highest-ranking Nursing Journals: Improvement in the Quality Since CONSORT  
10 Extension for Abstracts 2021.  
11  
12 15 Baulig C, Krummenauer F, Geis B, et al. Reporting quality of randomised controlled trial  
13 abstracts on age-related macular degeneration health care: a cross-sectional  
14 quantification of the adherence to CONSORT abstract reporting recommendations. *BMJ*  
15 *Open* 2018;8(5):e021912. doi:10.1136/bmjopen-2018-021912 [published Online First:  
16 22 May 2018].  
17  
18 16 Mbuagbaw L, Thabane M, Vanniyasingam T, et al. Improvement in the quality of  
19 abstracts in major clinical journals since CONSORT extension for abstracts: a  
20 systematic review. *Contemporary Clinical Trials* 2014;38(2):245–50.  
21 doi:10.1016/j.cct.2014.05.012 [published Online First: 23 May 2014].  
22  
23 17 Sriganesh K, Bharadwaj S, Wang M, et al. Quality of abstracts of randomized control  
24 trials in five top pain journals: A systematic survey. *Contemporary Clinical Trials*  
25 *Communications* 2017;7:64–68. doi:10.1016/j.conctc.2017.06.001 [published Online  
26 First: 9 June 2017].  
27  
28 18 Knippschild S, Loddenkemper J, Tulka S, et al. Assessment of reporting quality in  
29 randomised controlled clinical trial abstracts of dental implantology published from 2014  
30 to 2016. *BMJ Open* 2021;11(8):e045372.  
31  
32 19 Cui Q, Tian J, Song X, et al. Does the CONSORT checklist for abstracts improve the  
33 quality of reports of randomized controlled trials on clinical pathways? *J Eval Clin Pract*  
34 2014;20(6):827–33. doi:10.1111/jep.12200 [published Online First: 11 June 2014].  
35  
36 20 Can OS, Yilmaz AA, Hasdogan M, et al. Has the quality of abstracts for randomised  
37 controlled trials improved since the release of Consolidated Standards of Reporting  
38 Trial guideline for abstract reporting? A survey of four high-profile anaesthesia journals.  
39 *Eur J Anaesthesiol* 2011;28(7):485–92.  
40  
41 21 Chow JTY, Turkstra TP, Yim E, et al. The degree of adherence to CONSORT reporting  
42 guidelines for the abstracts of randomised clinical trials published in anaesthesia  
43 journals: A cross-sectional study of reporting adherence in 2010 and 2016. *Eur J*  
44 *Anaesthesiol* 2018:942–48. doi:10.1097/EJA.0000000000000880 [published Online  
45 First: 17 September 2018].  
46  
47 22 Sivendran S, Newport K, Horst M, et al. Reporting quality of abstracts in phase III  
48 clinical trials of systemic therapy in metastatic solid malignancies. *Trials* 2015;16:341.  
49 doi:10.1186/s13063-015-0885-9 [published Online First: 8 August 2015].  
50  
51  
52  
53  
54  
55  
56  
57  
58  
59  
60

Wiehn et al.

---

- 1  
2  
3 23 Speich B, Mc Cord KA, Agarwal A, et al. Reporting Quality of Journal Abstracts for  
4 Surgical Randomized Controlled Trials Before and After the Implementation of the  
5 CONSORT Extension for Abstracts. *World J Surg* 2019;2371–78. doi:10.1007/s00268-  
6 019-05064-1 [published Online First: 20 June 2019].  
7  
8  
9 24 Hua F, Walsh T, Glenny A-M, et al. Structure formats of randomised controlled trial  
10 abstracts: a cross-sectional analysis of their current usage and association with  
11 methodology reporting. *BMC Med Res Methodol* 2018;18(1):6. doi:10.1186/s12874-  
12 017-0469-3 [published Online First: 10 January 2018].  
13  
14  
15 25 Feinstein AR, Cicchetti DV. High agreement but low Kappa: I. the problems of two  
16 paradoxes. *J Clin Epidemiol* 1990;43(6):543–49.  
17  
18  
19 <http://www.sciencedirect.com/science/article/pii/089543569090158L>.  
20  
21  
22  
23  
24  
25  
26  
27  
28  
29  
30  
31  
32  
33  
34  
35  
36  
37  
38  
39  
40  
41  
42  
43  
44  
45  
46  
47  
48  
49  
50  
51  
52  
53  
54  
55  
56  
57  
58  
59  
60

**Proposed items to be used for reporting methodology research, adapted from the PRISMA Checklist (Murad & Wang, 2017)**

| Section and Topic    | Checklist item                                                                                                                                                                                                                         | Location where item is reported                                                               |
|----------------------|----------------------------------------------------------------------------------------------------------------------------------------------------------------------------------------------------------------------------------------|-----------------------------------------------------------------------------------------------|
| <b>TITLE</b>         |                                                                                                                                                                                                                                        |                                                                                               |
| Title                | Identify the report as a meta-epidemiologic study                                                                                                                                                                                      | p. 1, l. 2                                                                                    |
| <b>ABSTRACT</b>      |                                                                                                                                                                                                                                        |                                                                                               |
| Structured summary   | Provide a structured summary that includes the background of the topic, goal of the study, data sources, method of data selection, appraisal and synthesis methods, results, limitations, conclusions and implications of key findings | p. 2, l. 13 -p. 3, l. 49                                                                      |
| <b>INTRODUCTION</b>  |                                                                                                                                                                                                                                        |                                                                                               |
| Rationale            | Describe the rationale for the meta-epidemiological study in the context of what is already known                                                                                                                                      | p. 5, l. 66 - 88                                                                              |
| Objective            | Provide an explicit statement of the goal of the meta-epidemiological study and the hypothesis being empirically tested                                                                                                                | p. 5, l. 88 - p. 6, l. 91                                                                     |
| <b>METHODS</b>       |                                                                                                                                                                                                                                        |                                                                                               |
| Protocol             | Indicate if a protocol exists, if and where it can be accessed (eg, Web address).<br>Registration of a protocol is not mandatory                                                                                                       | p. 16, l. 334-337                                                                             |
| Eligibility criteria | Specify study characteristics used as criteria for eligibility with a rationale                                                                                                                                                        | p. 6, l. 95-102<br>Supplementary S1                                                           |
| Information sources  | Describe all information sources (eg, databases with dates of coverage, contact with experts to identify additional studies, Internet searches) and search date                                                                        | p. 6, l. 104-112<br>Supplementary S3                                                          |
| Search               | Present full electronic search strategy for at least one database, including any limits used, such that it could be repeated. Search is commonly not driven by a clinical question                                                     | Supplementary S2<br>(tables longer than two pages are published as online only supplementary) |

|    |                                    |                                                |                  |
|----|------------------------------------|------------------------------------------------|------------------|
| 1  |                                    |                                                |                  |
| 2  |                                    |                                                |                  |
| 3  | Study selection                    | Describe the process for selecting studies     | p. 7, l. 114-115 |
| 4  |                                    | for inclusion (ie, how many reviewers          | Figure 1         |
| 5  |                                    | selected studies, reviewing in duplicate or    |                  |
| 6  |                                    | by single individuals)                         |                  |
| 7  |                                    |                                                |                  |
| 8  |                                    |                                                |                  |
| 9  | Data collection process            | Describe method of data extraction from        | p. 7, l. 115-130 |
| 10 |                                    | reports (eg, piloted forms, independently, in  |                  |
| 11 |                                    | duplicate) and any processes used for          |                  |
| 12 |                                    | manipulating data or obtaining and             |                  |
| 13 |                                    | confirming data from investigators             |                  |
| 14 |                                    |                                                |                  |
| 15 |                                    |                                                |                  |
| 16 |                                    |                                                |                  |
| 17 | Data items                         | List and define all variables for which data   | Supplementary S5 |
| 18 |                                    | were sought and any assumptions and            | Supplementary S7 |
| 19 |                                    | imputations made                               |                  |
| 20 |                                    |                                                |                  |
| 21 |                                    |                                                |                  |
| 22 | Risk of bias in individual studies | If risk of bias assessment of individual       | Not relevant     |
| 23 |                                    | studies was relevant to the analysis,          |                  |
| 24 |                                    | describe the items used and how this           |                  |
| 25 |                                    | information is to be used during data          |                  |
| 26 |                                    | synthesis                                      |                  |
| 27 |                                    |                                                |                  |
| 28 |                                    |                                                |                  |
| 29 |                                    |                                                |                  |
| 30 | Summary measures                   | State the principal summary measures (eg,      | p. 7, l. 136 –   |
| 31 |                                    | ratio of risk ratios, difference in means) and | p. 8, l. 141     |
| 32 |                                    | explain its meaning and direction to readers   |                  |
| 33 |                                    |                                                |                  |
| 34 | Synthesis of results               | Describe the statistical or descriptive        | Not relevant     |
| 35 |                                    | methods of synthesis including measures        |                  |
| 36 |                                    | of consistency if relevant. If applicable,     |                  |
| 37 |                                    | describe the development of statistical or     |                  |
| 38 |                                    | simulation modelling based on theoretical      |                  |
| 39 |                                    | background. Describe and justify               |                  |
| 40 |                                    | assumptions and computational                  |                  |
| 41 |                                    | approximations. Describe methods of            |                  |
| 42 |                                    | additional analyses (eg, sensitivity or        |                  |
| 43 |                                    | subgroup analyses, meta-regression), if        |                  |
| 44 |                                    | done, indicating which were prespecified       |                  |
| 45 |                                    |                                                |                  |
| 46 |                                    |                                                |                  |
| 47 |                                    |                                                |                  |
| 48 |                                    |                                                |                  |
| 49 |                                    |                                                |                  |
| 50 |                                    |                                                |                  |
| 51 |                                    |                                                |                  |

## RESULTS

|    |                 |                                             |                  |
|----|-----------------|---------------------------------------------|------------------|
| 52 |                 |                                             |                  |
| 53 | Study selection | Give numbers of studies assessed for        | p. 8, l. 156-161 |
| 54 |                 | eligibility and included in the study, with | Figure 1         |
| 55 |                 | reasons for exclusions at each stage,       | Supplementary S7 |
| 56 |                 | ideally with a flow diagram. Present a      |                  |
| 57 |                 |                                             |                  |
| 58 |                 |                                             |                  |
| 59 |                 |                                             |                  |
| 60 |                 |                                             |                  |

|                               |                                                                                                                                                                                                                     |                                                           |                                                                                                                                       |
|-------------------------------|---------------------------------------------------------------------------------------------------------------------------------------------------------------------------------------------------------------------|-----------------------------------------------------------|---------------------------------------------------------------------------------------------------------------------------------------|
|                               |                                                                                                                                                                                                                     | measure of inter-reviewer agreement (eg, kappa statistic) |                                                                                                                                       |
| Study characteristics         | For each study, present characteristics for which data were extracted and provide the citations. Clinical characteristics may not always be relevant                                                                |                                                           | p. 9, l. 162 - 170                                                                                                                    |
| Risk of bias within studies   | If risk of bias assessment of individual studies was used in the meta-epidemiological analysis, report risk of bias indicators of each study to allow replication of findings                                       |                                                           | Not relevant                                                                                                                          |
| Results of individual studies | Present data elements used in the meta-epidemiological analysis from each study (results of clinical outcomes may not be relevant)                                                                                  |                                                           | Data of individual studies can be retrieved from an online repository ( <a href="https://bit.ly/3tl7kvz">https://bit.ly/3tl7kvz</a> ) |
| Synthesis of results          | Present results of statistical analysis done, including measures of precision and measures of consistency. Present validity of assumptions and fit of statistical or simulation modelling, if applicable            |                                                           | p. 8, l. 155 –<br>p. 9, l. 178                                                                                                        |
| Additional analysis           | Give results of additional analyses, if done (eg, sensitivity or subgroup analyses, metaregression)                                                                                                                 |                                                           | p. 9, l. 180 –<br>- 191                                                                                                               |
| <b>DISCUSSION</b>             |                                                                                                                                                                                                                     |                                                           |                                                                                                                                       |
| Summary of evidence           | Summarise the main findings and compare them with existing knowledge about the topic. The quality of evidence may not be relevant; however, investigators should describe their certainty in the results to readers |                                                           | p. 10, l. 198 –<br>p. 13, l. 279                                                                                                      |
| Limitations                   | Discuss limitations at research methodology level (eg, likelihood of reporting or publication bias)                                                                                                                 |                                                           | p. 13, l. 280 –<br>p. 15, l. 309                                                                                                      |
| Conclusions                   | Provide general interpretation of the results and implications for future research.                                                                                                                                 |                                                           | p. 15, l. 310 –<br>p. 15, l. 321                                                                                                      |



1  
2  
3 Provide any plausible impact on clinical  
4 practice  
5

## 6 FUNDING

7  
8 Funding

9 Describe sources of funding for the  
10 methodology research and role of funders

11 p. 15, l. 324-325  
12  
13  
14  
15  
16  
17  
18  
19  
20  
21  
22  
23  
24  
25  
26  
27  
28  
29  
30  
31  
32  
33  
34  
35  
36  
37  
38  
39  
40  
41  
42  
43  
44  
45  
46  
47  
48  
49  
50  
51  
52  
53  
54  
55  
56  
57  
58  
59  
60

For peer review only
